# Supplementary material for: Systematic review and meta-analysis of the risk of rheumatoid arthritis-associated interstitial lung disease related to anti-cyclic citrullinated peptide (CCP) antibody
Source: PubMed Central journal article supplement — BMJ Open. 2021 Mar 31;11(3):e040465. doi: 10.1136/bmjopen-2020-040465 (PMC8016072; doi:10.1136/bmjopen-2020-040465), 2021-03-31
Supplement: bmjopen-2020-040465.draft_revisions.pdf [file bmjopen-2020-040465.draft_revisions.pdf]

# BMJ Open

BMJ Open is committed to open peer review. As part of this commitment we make the peer review history of every article we publish publicly available.

When an article is published we post the peer reviewers' comments and the authors' responses online. We also post the versions of the paper that were used during peer review. These are the versions that the peer review comments apply to.

The versions of the paper that follow are the versions that were submitted during the peer review process. They are not the versions of record or the final published versions. They should not be cited or distributed as the published version of this manuscript.

BMJ Open is an open access journal and the full, final, typeset and author-corrected version of record of the manuscript is available on our site with no access controls, subscription charges or pay-per-view fees (<http://bmjopen.bmj.com>).

If you have any questions on BMJ Open's open peer review process please email [info.bmjopen@bmj.com](mailto:info.bmjopen@bmj.com)

# BMJ Open

## **A systematic review and meta-analysis of the risk of rheumatoid arthritis-associated interstitial lung disease related to anti-cyclic citrullinated peptide (CCP) antibody**

|                               |                                                                                                                                                                      |
|-------------------------------|----------------------------------------------------------------------------------------------------------------------------------------------------------------------|
| Journal:                      | <i>BMJ Open</i>                                                                                                                                                      |
| Manuscript ID                 | bmjopen-2020-040465                                                                                                                                                  |
| Article Type:                 | Original research                                                                                                                                                    |
| Date Submitted by the Author: | 14-May-2020                                                                                                                                                          |
| Complete List of Authors:     | Kamiya, Hiroyuki; Tatebayashi Kosei General Hospital, Department of Respiratory Medicine<br>Panlaqui, Ogee; Northern Hospital, Department of Intensive Care Medicine |
| Keywords:                     | RHEUMATOLOGY, Thoracic medicine < INTERNAL MEDICINE, Interstitial lung disease < THORACIC MEDICINE                                                                   |
|                               |                                                                                                                                                                      |

SCHOLARONE™  
Manuscripts

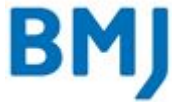

I, the Submitting Author has the right to grant and does grant on behalf of all authors of the Work (as defined in the below author licence), an exclusive licence and/or a non-exclusive licence for contributions from authors who are: i) UK Crown employees; ii) where BMJ has agreed a CC-BY licence shall apply, and/or iii) in accordance with the terms applicable for US Federal Government officers or employees acting as part of their official duties; on a worldwide, perpetual, irrevocable, royalty-free basis to BMJ Publishing Group Ltd ("BMJ") its licensees and where the relevant Journal is co-owned by BMJ to the co-owners of the Journal, to publish the Work in this journal and any other BMJ products and to exploit all rights, as set out in our [licence](#).

The Submitting Author accepts and understands that any supply made under these terms is made by BMJ to the Submitting Author unless you are acting as an employee on behalf of your employer or a postgraduate student of an affiliated institution which is paying any applicable article publishing charge ("APC") for Open Access articles. Where the Submitting Author wishes to make the Work available on an Open Access basis (and intends to pay the relevant APC), the terms of reuse of such Open Access shall be governed by a Creative Commons licence – details of these licences and which [Creative Commons](#) licence will apply to this Work are set out in our licence referred to above.

Other than as permitted in any relevant BMJ Author's Self Archiving Policies, I confirm this Work has not been accepted for publication elsewhere, is not being considered for publication elsewhere and does not duplicate material already published. I confirm all authors consent to publication of this Work and authorise the granting of this licence.

**Title**

A systematic review and meta-analysis of the risk of rheumatoid arthritis-associated interstitial lung disease related to anti-cyclic citrullinated peptide (CCP) antibody

**Authors**

Hiroyuki Kamiya<sup>1</sup>, Ogee Mer Panlaqui<sup>2</sup>

<sup>1</sup> Department of Respiratory Medicine, Tatebayashi Kosei General Hospital, Gunma, Japan

<sup>2</sup> Department of Intensive Care Medicine, Northern Hospital, Melbourne, Australia

**Correspondence**

Hiroyuki Kamiya

Department of Respiratory Medicine, Tatebayashi Kosei General Hospital, Gunma, Japan 374-8533

Phone: +81-276-72-3140

Email: mlb04194@nifty.com

**Word count**

3960

## Keywords

Rheumatoid arthritis, interstitial lung disease, anti-cyclic citrullinated peptide antibody, risk, review

## Article Summary

Strengths and limitations of this study

- This systematic review and meta-analysis addressed the risk of RA-ILD related to both the presence and titres of anti-CCP antibody, which was not clarified in previous literature.
- A substantial variance in the results of primary studies, which may have been derived from the diversity of anti-CCP antibody assays and included subjects, may undermine the generalizability of the findings of this study.
- The usefulness of the findings may be limited in clinical practice because of high probability of the autoantibody positivity for RA without ILD and no standard cut-off points for its assays.

## ABSTRACT

### Objective

To clarify the risk of rheumatoid arthritis-associated interstitial lung disease (RA-ILD) related to anti-cyclic citrullinated peptide (CCP) antibody.

### Design

A systematic review and meta-analysis.

### Data sources

Medline, EMBASE, Science Citation Index Expanded and Cochrane Central Register of Controlled Trials were searched from the inception through 12 November 2019.

### Eligibility criteria for selecting studies

Patients with RA with and without ILD were eligible. All assays for anti-CCP antibody were included although non-specified anti-citrullinated peptide antibody was excluded.

The primary outcome was the prevalence or incidence of ILD. Primary studies of any design aside from a case report were eligible.

### Data extraction and synthesis

Two reviewers independently selected eligible reports and extracted relevant data.

Meta-analysis was conducted using a random-effects model and summarized separately using odds ratios (ORs) or standardized mean differences (SMDs).

### Results

1  
2  
3  
4  
5  
6 29 out of 827 records retrieved through electronic databases and four additional reports  
7  
8 identified from other sources were eligible. Finally, 29 of these studies were focused for  
9  
10 the review. A total of 10158 subjects were included and the mean age was between 45.8  
11  
12 and 63.9 years. The mean disease duration was between 4.3 and 14.9 years. A number  
13  
14 of different anti-CCP antibody tests were employed and its positivity ranged from  
15  
16 50.7% to 95.8%. All studies except for two were deemed as high risk of bias. A pooled  
17  
18 analysis of univariate results demonstrated that the presence of anti-CCP antibody was  
19  
20 significantly associated with RA-ILD with an OR of 2.08 (95%CI: 1.05-2.88).  
21  
22 Similarly, the titre of anti-CCP antibody was significantly higher for RA-ILD with an  
23  
24 SMD of 0.42 (95%CI: 0.20-0.65). These results were confirmed by multivariate  
25  
26 analysis in the majority of studies and consistent by any subgroup and sensitivity  
27  
28 analyses.  
29  
30  
31  
32

### 33 Conclusion

34  
35  
36 The presence and higher titres of anti-CCP antibody were significantly associated with  
37  
38 an increased risk of RA-ILD.  
39  
40  
41  
42  
43  
44  
45  
46  
47  
48  
49  
50  
51  
52  
53  
54  
55  
56  
57  
58  
59  
60

## Background

Rheumatoid arthritis (RA) is a systemic autoimmune disorder that is characterized by a chronic synovial inflammation and eventual joint destruction.[1] Although arthritis is the main manifestation of the disease, it also damages diverse extra-articular organs such as heart, lung, kidney, eye and skin.[2] Interstitial lung disease (ILD) is one of the most common comorbidities of RA and the prevalence of ILD for patients with RA is reported to be 10% to 40% although it varies depending on the target population, a definition of the disease and diagnostic modalities.[3] A complication of ILD deeply affects the prognosis of RA because RA-associated ILD (RA-ILD) is often progressive and only a limited therapeutic option is available.[4] It is also complicated by acute exacerbation and lung cancer.[5-6] As a result, ILD is reported to be the third leading cause of deaths of RA [7] and approximately two thirds of patients with RA-ILD eventually die within 5 years, resulting in a hazard ratio of mortality about 3.0 in comparison to RA without ILD.[8] Moreover, the most common type of ILDs among RA-ILDs, i.e., usual interstitial pneumonia (UIP),[9] demonstrates the worst prognosis, which is similar to the mortality of idiopathic pulmonary fibrosis (IPF).[10] In this context estimating the risk of developing ILD will help clinicians' decision-making and may improve the prognosis of the disease.[11] Historically, a number of studies investigated risk factors for the development of ILD and some clinical information are reported to be associated with an increased risk of RA-ILD, which include male gender,[12] smoking,[13] severe disease [14] and rheumatoid factor (RF).[15] Anti-citrullinated peptide antibody (ACPA) is a specific marker for RA and included in the latest classification criteria for an accurate diagnosis of the disease.[16] Currently,



1  
2  
3  
4  
5  
6 anti-cyclic citrullinated peptide (CCP) antibody, representing ACPAs is available  
7  
8 commercially and usually measured in clinical practice. The autoantibody is also  
9  
10 reported to be associated with an increased risk of extra-articular manifestations such as  
11  
12 ILD.[17] However, previous studies noted inconsistent results [18-19] and the former  
13  
14 systematic review seems to be limited by relatively a small number of studies and  
15  
16 unclear definition of ILD and IPF.[20] The aim of this systematic review and  
17  
18 meta-analysis was to clarify current evidence regarding the association of anti-CCP  
19  
20 antibody with RA-ILD.  
21  
22

## 23 24 25 **Methods**

26  
27 This review was conducted and reported according to the Preferred Reporting Items for  
28  
29 Systematic Reviews and Meta-Analyses (PRISMA) [21] and the Meta-analysis of  
30  
31 Observational Studies in Epidemiology (MOOSE) statement.[22]  
32  
33

### 34 35 Patient and public involvement

36  
37 There was no patient and public involvement in the whole process of conducting this  
38  
39 research.  
40  
41

### 42 43 Eligibility

44  
45 Patients with RA were eligible for this review. RA was diagnosed based on its widely  
46  
47 used classification criteria, i.e., the 1987 American College of Rheumatology  
48  
49 classification criteria [23] and the 2010 American College of Rheumatology/European  
50  
51 League Against Rheumatism classification criteria.[16] ILD was characterized by  
52  
53 interstitial inflammatory and fibrotic changes in pulmonary parenchyma and diagnosed  
54  
55 based on symptomatic, functional, radiological and/or pathological findings.[24] The  
56  
57  
58  
59  
60

1  
2  
3  
4  
5  
6 pattern of ILD was classified following the international multidisciplinary classification  
7  
8 such as an official American Thoracic Society/European Respiratory Society  
9  
10 statement.[25] Other pulmonary lesions associated with RA such as bronchiolitis,  
11  
12 bronchiectasis and pleuritis were all excluded. An overlap with other connective tissue  
13  
14 diseases was included if RA was the main disease of interest in the study. There was no  
15  
16 limitation regarding demographic features of subjects, such as gender and ethnicity,  
17  
18 duration of RA and ILD and the severity of the disease unless they were less than the  
19  
20 age of 18. Subjects were allowed to participate at any point in time along their clinical  
21  
22 course of the disease.  
23  
24

25  
26  
27 Anti-CCP antibody was examined using Enzyme-Linked Immunosorbent Assay  
28  
29 (ELISA).[26] Although measurements of anti-CCP antibody were different among  
30  
31 manufacturers and each institution adopted a different test, all kinds of anti-CCP  
32  
33 antibody assays were eligible for the review. However, ACPA, which was not specified  
34  
35 as anti-CCP antibody, was excluded because it may have represented autoantibodies  
36  
37 against different citrullinated peptides.  
38  
39

40  
41 The outcome of interest in this review was the prevalence or incidence of ILD. Any  
42  
43 design of primary studies other than a case report was eligible if it described the  
44  
45 association of anti-CCP antibody with RA-ILD. Conference proceedings, letters or  
46  
47 editorials and review articles were ineligible. Only reports published in English was  
48  
49 considered.  
50  
51

## 52 53 Search strategy

54  
55  
56 The following electronic databases were searched, Medline, EMBASE, Science Citation  
57  
58 Index Expanded and Cochrane Central Register of Controlled Trials, using subject  
59  
60

1  
2  
3  
4  
5  
6 headings and text words related to study population such as ‘rheumatoid arthritis’,  
7  
8 ‘interstitial lung disease’ and ‘anti-cyclic citrullinated peptide antibodies’ (e-Appendix).  
9  
10 Search terms were constructed referring to a systematic review in a similar research area  
11  
12 identified through the Cochrane Database of Systematic Reviews (CDSR).[27]  
13  
14 Methodology filters were not used to avoid limiting the sensitivity of the search. The  
15  
16 search was covered from the inception of each database through to the 12<sup>th</sup> of  
17  
18 November 2019. The reference lists of eligible studies and relevant review articles were  
19  
20 also hand-searched to identify additional reports. Google Scholar was employed to  
21  
22 search grey literature.[28]  
23  
24  
25

#### 26 27 Study selection and data collection process

28  
29 Two reviewers (H.K. and O.M.P.) independently examined titles and abstracts of all  
30  
31 retrieved articles to select eligible reports. The same reviewers also extracted relevant  
32  
33 data based on a modified data extraction form, which was previously published in a  
34  
35 protocol paper for a systematic review.[29] Any uncertainty or disagreement between  
36  
37 reviewers arising from these processes was resolved through discussion. The following  
38  
39 data was extracted from each eligible study: first author’s name, year of publication,  
40  
41 study location, study design, sample size and its demographic features, ILD patterns if  
42  
43 available, manufacturers of anti-CCP antibody tests and their cut-off points if available,  
44  
45 a proportion of positivity and titres of anti-CCP antibodies for RA with and without  
46  
47 ILD, methods for statistical analysis, summary statistics and items associated with a risk  
48  
49 of bias.  
50  
51  
52  
53

#### 54 55 Risk of bias in individual studies

1  
2  
3  
4  
5  
6 As all studies investigated the association of anti-CCP antibody with RA-ILD as risk  
7  
8 estimates, the Quality in Prognostic Studies (QUIPS) tool was modified and applied to  
9  
10 assess a risk of bias in individual studies.[30] However, one of six domains that  
11  
12 constitute the tool, i.e., ‘the attrition of study population’, was considered irrelevant and  
13  
14 thus excluded because all studies were designed as cross-sectional or case-control  
15  
16 studies. Each domain received an individual bias rating (low, moderate or high), with an  
17  
18 overall risk of bias based on a total rating of all domains. For example, a study showing  
19  
20 a low risk of bias across all domains was deemed as being subject to a low risk of bias  
21  
22 overall.  
23  
24  
25

## 26 Statistical analysis

### 27 *Summary statistics*

28  
29  
30 The effect size of the risk of RA-ILD associated with the presence of anti-CCP antibody  
31  
32 was measured using either risk ratios (RRs) or odds ratios (ORs). In a case where titres  
33  
34 of anti-CCP antibody were compared between the two comparative groups with or  
35  
36 without ILD, the mean difference (MD) was calculated to reveal the difference of the  
37  
38 autoantibody titres. If the median was utilized instead of the mean, it was presented for  
39  
40 each of the two groups. If the summary statistics were not provided directly, the ORs or  
41  
42 RRs were calculated manually based on the absolute number of the outcome across the  
43  
44 two comparative groups.  
45  
46  
47  
48  
49

### 50 *Data synthesis*

51  
52 The effect size of an association between anti-CCP antibody and RA-ILD was  
53  
54 statistically combined if it was presented using the same statistics in three or more  
55  
56  
57  
58  
59  
60

1  
2  
3  
4  
5  
6 studies. The results were summarized using ORs if anti-CCP antibody was reported as  
7  
8 binary (positive/negative). If the titre of anti-CCP antibody was reported, a standardized  
9  
10 MD (calculated as Hedge's  $g$ ) was utilized to combine the results.[31] If the median,  
11  
12 range or interquartile range was described to report the autoantibody titres, they were  
13  
14 converted to the mean and standard deviation, using a formula reported by a previous  
15  
16 study, to be summarized as MDs or SMDs.[32] Only the results of univariate analysis  
17  
18 were combined whereas those of multivariate analysis were described qualitatively  
19  
20 because adjusted variables in multivariate models varied substantially between studies  
21  
22 and pooling these data could be misleading. If meta-analysis was feasible from the  
23  
24 collated data, it was conducted using a random-effects model employing the  
25  
26 DerSimonian and Laird method.[33] Meta-analysis was conducted using the statistical  
27  
28 software package, Review Manager (RevMan) Version 5.3 (Copenhagen: The Nordic  
29  
30 Cochrane Centre, The Cochrane Collaboration, 2014). Statistical significance was  
31  
32 considered with a p-value of  $<0.05$ . If combining data was deemed inappropriate due to  
33  
34 a small number of studies, the results were to be reported qualitatively.  
35  
36  
37  
38

#### 40 *Heterogeneity between studies*

41  
42  
43 Between-study variance was assessed using both  $Q$  statistics and  $I^2$  value. For the  
44  
45 assessment of heterogeneity between studies, statistical significance was considered  
46  
47 with a p-value of  $<0.1$  due to the low power of the test. Magnitude of heterogeneity was  
48  
49 categorised as low ( $<30\%$ ), moderate ( $\geq 30\%$ ,  $<50\%$ ), considerable ( $\geq 50\%$ ,  $<70\%$ ) and  
50  
51 substantial ( $\geq 70\%$ ).[34] When heterogeneity was identified, the 95% prediction interval  
52  
53 (PI) was presented in addition to the 95% confidence interval (CI).[35] To better  
54  
55 interpret sources of heterogeneity, subgroup analysis was conducted based on study  
56  
57  
58  
59  
60

1  
2  
3  
4  
5  
6 location (Asia or non-Asia) and study design (cross-sectional or case-control).

7  
8 Sensitivity analysis was also considered focusing on the measurements of anti-CCP  
9  
10 antibody (same manufacturer and same generation of the autoantibody assay).

### 11 12 13 *Meta-biases*

14  
15  
16 Small study bias (such as publication bias) was examined graphically using a funnel  
17  
18 plot and statistically by the Egger's test using Stata 14 (STATA Corp LLC., College  
19  
20 Station, TX, USA) if ten or more studies were available for meta-analysis.[36]

21  
22  
23 Statistical significance of the test was considered with a p-value of <0.1 due to the low  
24  
25 power of the test.

### 26 27 28 Confidence in cumulative evidence

29  
30  
31 The Grades of Recommendation, Assessment, Development and Evaluation (GRADE)  
32  
33 for prognosis [37] was applied to assess the credibility of evidence generated from this  
34  
35 review because all studies investigated the association of anti-CCP antibody with  
36  
37 RA-ILD as risk estimates.

## 38 39 40 **Results**

### 41 42 43 Search for eligible studies

44  
45  
46 Out of a total of 827 records identified through a search of five electronic databases, 182  
47  
48 duplicates were removed and 645 records were screened by titles and abstracts. After  
49  
50 320 records consisting of non-English reports (n=16) and 304 articles of ineligible types  
51  
52 (conference proceedings (n=153), case reports (n=72), editorials or letters (n=10) and  
53  
54 review articles (n=69)) and 265 irrelevant papers were further excluded, the remaining  
55  
56 60 records were retrieved as full-texts. Out of these, 29 reposts/studies were eligible for  
57  
58

1  
2  
3  
4  
5  
6 the review and additionally four reports were identified through a hand-search of  
7  
8 references of eligible studies. As a result, a total of 33 reports were considered for the  
9  
10 review (Figure 1). In each of three different groups, which conducted two studies  
11  
12 sharing the same cohort, only the study with a larger sample size was included for the  
13  
14 review.[38-40] Similarly, among three studies conducted by one group, the study with  
15  
16 the largest sample size was included for the review.[41] Furthermore, another study  
17  
18 among these three studies was also included because it reported two different cohorts,  
19  
20 one of which was not overlapped by the other studies.[42] There was also a study that  
21  
22 reported two different cohorts, only one of which was included because it was not  
23  
24 overlapped by the other studies.[43] Finally, a total of 29 studies/cohorts were focused  
25  
26 for further analysis.[38-66]

### 31 Characteristics of included studies

32  
33  
34 Study location of a total of 29 studies were distributed globally with Asia in the largest  
35  
36 number (n=15), which was followed by the Americas (n=7), Europe (n=3), Africa (n=2)  
37  
38 and others (n=2). 22 studies were cross-sectional while the remaining seven were  
39  
40 case-control studies. A complication of other CTDs was mentioned in 10 studies and  
41  
42 ILD patterns were detailed in three studies. The number of subjects enrolled in each  
43  
44 study ranged from 41 to 2702, which amounted to 10158 subjects in total and the mean  
45  
46 age was between 45.8 and 63.9 years. The proportion of men, smoking history and ILD  
47  
48 ranged from 4.0% to 90.1%, 1.9% to 98.9% and 4.9% to 71.6%, respectively. The mean  
49  
50 duration of RA was between 4.3 and 14.9 years and the disease activity, which was  
51  
52 represented by the mean disease activity score (DAS) 28, was between 2.5 and 5.4  
53  
54 (Table 1). The generation of anti-CCP antibody tests was specified in 14 studies, which  
55  
56  
57  
58  
59  
60

1  
2  
3  
4  
5  
6 consisted of the second generation in 12 studies and the third generation in two studies.

7  
8 The proportion of positivity of anti-CCP antibody was reported in 21 studies, which  
9  
10 ranged from 50.7% to 95.8% while the titre of the autoantibody was described in 18  
11  
12 studies (Table 2).

### 13 14 15 Risk of bias in individual studies

16  
17 All studies except for two contained high risk of bias rating in at least one domain and  
18  
19 thus was deemed as high risk of bias. Among the five domains constituting the QUIPS  
20  
21 tool, the risk of bias for statistical analysis and reporting and ILD confirmation were  
22  
23 rated as high in the majority of studies due to no or insufficient information regarding  
24  
25 model building process and inconsistent diagnostic procedures. The remaining two  
26  
27 studies were rated as moderate risk of bias (Table 3).

### 28 29 30 Association of anti-CCP antibody with RA-ILD

#### 31 32 33 *Univariate result*

34  
35 The association of the positivity of anti-CCP antibody with RA-ILD was reported in 20  
36  
37 studies. Eight out of these studies demonstrated significant results with the ORs ranging  
38  
39 from 1.98 to 44.5 (Table 2). Meta-analysis of 17 out of these 20 studies demonstrated  
40  
41 that the presence of anti-CCP antibody was significantly associated with RA-ILD with  
42  
43 an OR of 2.08 (95%CI: 1.05-2.88) with moderate heterogeneity ( $\chi^2=28.6$ ,  $p=0.03$ ,  
44  
45  $I^2=44\%$ ) (Figure 2).

46  
47 The titre of anti-CCP antibody was compared between RA with and without ILD in 18  
48  
49 studies. 11 out of these studies demonstrated significant results with higher titres  
50  
51 associated with RA-ILD (Table 2). Meta-analysis of 12 out of these 18 studies



1  
2  
3  
4  
5  
6 demonstrated that the titre of anti-CCP antibody was significantly higher for RA-ILD  
7  
8 with an SMD of 0.42 (95%CI: 0.20-0.65) with considerable heterogeneity ( $\chi^2=36.0$ ,  
9  
10  $p=0.0002$ ,  $I^2=69\%$ ) (Figure 3).

### 11 12 13 *Multivariate result*

14  
15  
16 Multivariate analysis was conducted in eight studies where detailed results were  
17  
18 available in seven studies and adjusted variables were diverse between studies. Six of  
19  
20 these seven studies demonstrated a positive association between the presence or higher  
21  
22 titres of anti-CCP antibody and RA-ILD and the results were statistically significant in  
23  
24 four studies (Table 2). Two studies (Yin 2014 [65] and Rocha-Munoz 2015 [59])  
25  
26 revealed the association of the positivity of anti-CCP antibody with RA-ILD as ORs of  
27  
28 3.50 (95%CI: 1.52-8.04) and 1.06 (95%CI: 1.02-1.10), respectively (Table 2). The  
29  
30 association of the titre of anti-CCP antibody with RA-ILD was reported by one study as  
31  
32 an OR of 1.08 (95%CI: 1.03-1.12) (Matsuo 2018 [53]) while it was described as 1.41  
33  
34 (95%CI: 1.01-1.97) by another study (Correia 2019 [47]).

### 35 36 37 38 39 *Subgroup analysis*

40  
41  
42 Subgroup analysis was conducted based on both study location and study design. There  
43  
44 was no significant difference in the effect size of the positivity of anti-CCP antibody  
45  
46 with ORs of 1.89 (95%CI: 1.21-2.95) by Asian reports and 2.31 (95%CI: 1.39-3.85) by  
47  
48 non-Asian reports ( $p=0.56$ ) although considerable heterogeneity remained in the latter  
49  
50 group (e-Figure 1). Similarly, there was no significant difference in the effect size of the  
51  
52 titre of anti-CCP antibody with SMDs of 0.38 (95%CI: 0.04-0.71) by Asian reports and  
53  
54 0.49 (95%CI: 0.24-0.74) by non-Asian reports ( $p=0.58$ ) although substantial  
55  
56 heterogeneity remained in the former group (e-Figure 2). There was no significant  
57  
58  
59  
60

1  
2  
3  
4  
5  
6 difference in the effect size of the positivity of anti-CCP antibody with ORs of 1.92  
7  
8 (95%CI: 1.32-2.80) by cross-sectional studies and 2.53 (95%CI: 1.26-5.08) by  
9  
10 case-control studies (p=0.50) although considerable heterogeneity remained in the latter  
11  
12 group (e-Figure 3). Similarly, there was no significant difference in the effect size of the  
13  
14 titre of anti-CCP antibody with SMDs of 0.39 (95%CI: 0.11-0.67) by cross-sectional  
15  
16 studies and 0.50 (95%CI: 0.12-0.89) by case-control studies (p=0.65) although  
17  
18 substantial heterogeneity remained in the former group (e-Figure 4).  
19  
20  
21

### 22 *Sensitivity analysis*

23  
24  
25 Sensitivity analysis was conducted focusing on the measurements of anti-CCP antibody.  
26  
27 A pooled analysis of 10 studies that examined the second generation of anti-CCP  
28  
29 antibody test demonstrated that the presence of anti-CCP antibody was significantly  
30  
31 associated with RA-ILD with an OR of 2.30 (95%CI: 1.34-3.93) although there  
32  
33 remained moderate heterogeneity ( $\chi^2=16.7$ ,  $p=0.05$ ,  $I^2=46\%$ ) (e-Figure 5).  
34  
35  
36

37  
38 A pooled analysis of three studies that examined the second generation of anti-CCP  
39  
40 antibody test by the same manufacture (Euroimmun, Lübeck, Germany) demonstrated  
41  
42 that the presence of anti-CCP antibody was significantly associated with RA-ILD with  
43  
44 an OR of 3.81 (95%CI: 1.08-13.5) although there remained considerable heterogeneity  
45  
46 ( $\chi^2=4.98$ ,  $p=0.08$ ,  $I^2=60\%$ ) (e-Figure 6).  
47  
48

49  
50 These sensitivity analyses were unable to be conducted for the titre of anti-CCP  
51  
52 antibody and other generations of the autoantibody test due to a small number of  
53  
54 studies.  
55

### 56 *Additional analysis*

1  
2  
3  
4  
5  
6 Two funnel plots (for both positivity and titre of anti-CCP antibody) were constructed to  
7  
8 investigate small study bias, both of which demonstrated no apparent asymmetry  
9  
10 (e-Figure 7 and e-Figure 8, respectively). This graphical assessment was confirmed  
11  
12 statistically by the Egger's test, which demonstrated no statistical significance ( $p=0.12$   
13  
14 and 0.28, respectively).  
15  
16

### 17 18 Assessment of evidence level

19  
20 Study limitation was considered present in all of the evidence because no studies were  
21  
22 deemed as low risk of bias. Publication bias was also considered present in all of the  
23  
24 evidence due to the property of studies of risk estimates [37] although it was not  
25  
26 confirmed in both graphical and statistical analyses for univariate results. Overall, the  
27  
28 level of evidence derived from this review was rated as low or very low (Table 4).  
29  
30  
31

### 32 33 Discussion

34  
35 This study demonstrated using a pooled analysis of univariate results that the presence  
36  
37 of anti-CCP antibody was significantly associated with RA-ILD and the titre of  
38  
39 anti-CCP antibody was significantly higher for RA-ILD than RA without ILD. The  
40  
41 results were confirmed by multivariate analyses in the majority of studies that reported  
42  
43 it. These findings suggest that anti-CCP antibody is related to an increased risk of ILD  
44  
45 for patients with RA. As this review was based on a large number of studies conducted  
46  
47 globally and the results were reproduced by any subgroup and sensitivity analyses, these  
48  
49 findings will be generalizable to a broader population.  
50  
51  
52

53  
54 It is desirable and important to identify a high risk group of patients with RA who are  
55  
56 likely to develop ILD because it is often progressive and worsens the prognosis of the  
57  
58

1  
2  
3  
4  
5  
6 disease.[67] If the development of ILD can be predicted, it will help clinicians'  
7  
8 decision-making and facilitate an efficient use of limited medical resources to change  
9  
10 clinical course of the disease. Much effort has been made to identify clinical  
11  
12 information such as serum biomarkers that can easily be obtained and help estimate the  
13  
14 risk of ILD for patients with RA.[68] Tests for ACPAs emerged as a tool to diagnose  
15  
16 early RA with higher specificity than traditionally employed RF.[69] They date back to  
17  
18 the discovery of anti-perinuclear factor and anti-keratin antibody in the sera of patients  
19  
20 with RA, which recognized the citrullinated protein filaggrin.[70] Subsequently, cyclic  
21  
22 citrullinated peptides (CCP) were synthesized to improve test performance [71] and  
23  
24 after further evolution currently the third generation of anti-CCP antibody test is  
25  
26 commercially available.[72] Anti-CCP antibody is not only helpful to diagnose RA but  
27  
28 also reported to be associated with extra-articular manifestations of the disease.[73] The  
29  
30 recent meta-analysis demonstrated an increased risk of RA-ILD as a result of serum  
31  
32 anti-CCP antibody positivity.[20] Although a number of specific citrullinated proteins  
33  
34 were discovered such as fibrinogen [74] and  $\alpha$ -enolase,[75] a diagnostic significance of  
35  
36 specific autoantibodies directed against these autoantigens has yet to be established.[76]

37  
38  
39  
40  
41  
42 RA is classified as a systemic autoimmune disorder although the pathogenesis of the  
43  
44 disease has been under dispute for many years.[77] Recent research suggests that the  
45  
46 breakdown of immunological tolerance initially occurs in the lungs under the influence  
47  
48 of environmental stress such as exposure to cigarette smoke and genetic  
49  
50 susceptibility.[78] In short, smoking accelerates the activity of the enzyme  
51  
52 peptidylarginine deiminase that catalyses the posttranslational convert of arginine to  
53  
54 citrulline, which eventually induces autoimmune reaction and leads to the formation of  
55  
56  
57  
58  
59  
60

1  
2  
3  
4  
5  
6 autoantibodies against citrullinated peptides under the interplay of both T and B  
7  
8 lymphocytes.[79] In these processes, a number of cytokines are generated and may  
9  
10 promote fibrotic changes of the lung.[80] Smoking is related to the development of ILD,  
11  
12 in particular, UIP, which is the most common type among RA-ILDs [9] and contributes  
13  
14 to the formation of ACPAs. Therefore, it is most likely that anti-CCP antibody is  
15  
16 closely associated with the development of ILD, in particular for genetically susceptible  
17  
18 subjects with smoking history and this relationship was confirmed in this report.  
19  
20  
21

22  
23 The current study is different from the previous systematic review [20] in that it  
24  
25 included a larger number of studies and subjects and thus the result is considered more  
26  
27 reliable. It also demonstrated that the titre of anti-CCP antibody was higher for RA-ILD  
28  
29 than RA without ILD. This finding is meaningful because anti-CCP antibody may be  
30  
31 positive in the majority of patients with RA regardless of the presence of ILD. Indeed,  
32  
33 the proportion of positivity of anti-CCP antibody for RA without ILD in this review  
34  
35 ranged from 49.1% to 95.8% with the median value of 71.0%. When the group of RA  
36  
37 without ILD is positive for anti-CCP antibody with high frequency, the benefit of the  
38  
39 autoantibody test for screening patients with RA at a higher risk of developing ILD will  
40  
41 be limited. Conversely, the finding of titres may be more informative because it can also  
42  
43 be employed to patients with RA without ILD who are tested positive for the  
44  
45 autoantibody. Therefore, titres of anti-CCP antibody may be more useful than just its  
46  
47 presence to estimate the risk of developing ILD. However, the interpretation of this  
48  
49 finding also needs a caution because it was derived from a comparison between  
50  
51 RA-ILD and RA without ILD and thus does not indicate any cut-off point that defines a  
52  
53 high or low titre of the autoantibody. As a result, in real clinical practice, clinicians need  
54  
55  
56  
57  
58  
59  
60

1  
2  
3  
4  
5  
6 to assess the implication of the titre of anti-CCP antibody on a case-by-case basis. What  
7  
8 makes the issue more complicated is the variability of measurements of anti-CCP  
9  
10 antibody, which were produced by a number of manufacturers. The sensitivity and  
11  
12 specificity varies depending on the tests and the titres are also different between  
13  
14 assays.[81] Although an SMD was employed in this review to enable the comparison of  
15  
16 titres derived from different tests, the result may be difficult to be applied in clinical  
17  
18 practice. These diversities of anti-CCP antibody tests can explain a large part of the  
19  
20 heterogeneity identified in meta-analyses of this review although other factors such as  
21  
22 the variability of enrolled subjects may also have been responsible for it.  
23  
24  
25

26  
27 There are other methodological limitations or caveats that need to be kept in mind to  
28  
29 appropriately interpret the results of this study. First, this review was only composed of  
30  
31 cross-sectional and case-control studies and thus causality between anti-CCP antibody  
32  
33 and RA-ILD cannot be deducted although it is aetiologically plausible. Second,  
34  
35 selection bias of subjects in individual studies cannot be ruled out. Patients with  
36  
37 RA-ILD at relatively advanced stage may have been included for the review. If this was  
38  
39 the case, the findings may not be applicable to an early stage of the disease and become  
40  
41 useless for screening purpose. Third, anti-CCP antibody may be most closely related to  
42  
43 UIP among other types of ILD complicated with RA. However, the association between  
44  
45 anti-CCP antibody and individual ILD patterns could not be elucidated in this review  
46  
47 because most of the studies did not report them. Finally, no studies were deemed as low  
48  
49 risk of bias. Due to this study limitation, the level of evidence obtained from this review  
50  
51 was all rated as low or very low. Therefore, more research with high quality using a  
52  
53  
54  
55  
56  
57  
58  
59  
60

1  
2  
3  
4  
5  
6 prospective cohort design needs to be accumulated to make a definitive conclusion or  
7  
8 solidify the findings of this review.  
9

## 10 **Conclusion**

11  
12  
13  
14 This systematic review and meta-analysis demonstrated that the presence of anti-CCP  
15  
16 antibody was significantly associated with RA-ILD and the titre of the autoantibody  
17  
18 was significantly higher for RA-ILD than RA without ILD. However, an applicability  
19  
20 of these findings may be limited due to the diversity of the autoantibody tests and high  
21  
22 frequency of their positivity for the control group.  
23  
24  
25

## 26 **Ethics approval and participant consent**

27  
28  
29 Neither ethics approval nor participant consent was required as this study was based  
30  
31 solely on the summary results of previously published articles. Individual patient data  
32  
33 were not obtained or accessed.  
34

## 35 **Data sharing**

36  
37  
38 The dataset used and/or analysed for this review will be available from the  
39  
40 corresponding author upon a reasonable request and may become open to the public  
41  
42 through a digital repository (such as Dryad) after the final result is published in a  
43  
44 journal.  
45

## 46 **Conflict of interest**

47  
48  
49 None to declare.  
50

## 51 **Funding**

52  
53  
54 This research received no specific grant from any funding agency in either the public,  
55  
56 commercial, or not-for-profit sectors.  
57  
58  
59

### Authors' contributions

H.K. planned the entire research project and analysed the data. He also summarized the result and wrote the manuscript. H.K. has full access to the data and takes responsibility for its integrity as well as the accuracy of the analysis.

O.M.P. contributed to the design of the research project and conducted the literature search and data extraction. He was also involved in revising the manuscript.

All researchers provided thoughts and opinions to compile a draft paper and approved of the final version of the manuscript.



## References

1. Smolen JS, Aletaha D, McInnes IB. Rheumatoid arthritis. *Lancet* 2016;388:2023-38.
2. Turesson C. Extra-articular rheumatoid arthritis. *Curr Opin Rheumatol* 2013;25:360-6.
3. Shaw M, Collins BF, Ho LA, et al. Rheumatoid arthritis-associated lung disease. *Eur Respir Rev* 2015;24:1-16.
4. Iqbal K, Kelly C. Treatment of rheumatoid arthritis-associated interstitial lung disease: a perspective review. *Ther Adv Musculoskelet Dis* 2015;7:247-67.
5. Hozumi H, Nakamura Y, Johkoh T, et al. Acute exacerbation in rheumatoid arthritis-associated interstitial lung disease: a retrospective case control study. *BMJ Open* 2013;3:e003132.
6. Nurmi HM, Purokivi MK, Karkkainen MS, et al. Variable course of disease of rheumatoid arthritis-associated usual interstitial pneumonia compared to other subtypes. *BMC Pulm Med* 2016;16:107.
7. Turesson C, Jacobsson L, Bergstrom U. Extra-articular rheumatoid arthritis: prevalence and mortality. *Rheumatology* 1999;38:668-74.
8. Bongartz T, Nannini C, Medina-Velasquez YF, et al. Incidence and mortality of interstitial lung disease in rheumatoid arthritis: a population-based study. *Arthritis Rheum* 2010;62:1583-91.
9. Tsuchiya Y, Takayanagi N, Sugiura H, et al. Lung diseases directly associated with rheumatoid arthritis and their relationship to outcome. *Eur Respir J* 2011;37:1411-7.

10. Solomon JJ, Ryu JH, Tazelaar HD, et al. Fibrosing interstitial pneumonia predicts survival in patients with rheumatoid arthritis-associated interstitial lung disease (RA-ILD). *Respir Med* 2013;107:1247-52.
11. Paulin F, Babini A, Mamani M, et al. Practical approach to the evaluation and management of rheumatoid arthritis-interstitial lung disease based on its proven and hypothetical mechanisms. *Rev Invest Clin* 2017;69:235-42.
12. Gabbay E, Tarala R, Will R, et al. Interstitial lung disease in recent onset rheumatoid arthritis. *Am J Respir Crit Care Med* 1997;156:528-35.
13. Gochuico BR, Avila NA, Chow CK, et al. Progressive preclinical interstitial lung disease in rheumatoid arthritis. *Arch Intern Med* 2008;168:159-66.
14. Habib HM, Eisa AA, Arafat WR, et al. Pulmonary involvement in early rheumatoid arthritis patients. *Clin Rheumatol* 2011;30:217-21.
15. Zhang Y, Li H, Wu N, et al. Retrospective study of the clinical characteristics and risk factors of rheumatoid arthritis-associated interstitial lung disease. *Clin Rheumatol* 2017;36:817-23.
16. Aletaha D, Neogi T, Silman AJ, et al. 2010 Rheumatoid arthritis classification criteria: an American College of Rheumatology/European League Against Rheumatism collaborative initiative. *Arthritis Rheum* 2010;62:2569-81.
17. Aubart F, Crestani B, Nicaise-Roland P, et al. High levels of anti-cyclic citrullinated peptide autoantibodies are associated with co-occurrence of pulmonary diseases with rheumatoid arthritis. *J Rheumatol* 2011;38:979-82.
18. Inui N, Enomoto N, Suda T, et al. Anti-cyclic citrullinated peptide antibodies in lung diseases associated with rheumatoid arthritis. *Clin Biochem* 2008;41:1074-7.

- 1  
2  
3  
4  
5  
6 19. Jearn LH, Kim TY. Level of anticitrullinated peptide/protein antibody is not  
7 associated with lung diseases in rheumatoid arthritis. *J Rheumatol* 2012;39:1493-4.  
8  
9  
10 20. Zhu J, Zhou Y, Chen X, et al. A metaanalysis of the increased risk of  
11 rheumatoid arthritis-related pulmonary disease as a result of serum anticitrullinated  
12 protein antibody positivity. *J Rheumatol* 2014;41:1282-9.  
13  
14  
15 21. Moher D, Liberati A, Tetzlaff J, et al. Preferred reporting items for systematic  
16 reviews and meta-analyses: the PRISMA statement. *Ann Intern Med* 2009;151:264-9.  
17  
18  
19 22. Stroup DF, Berlin JA, Morton SC, et al. Meta-analysis of observational studies  
20 in epidemiology: a proposal for reporting. Meta-analysis of observational studies in  
21 epidemiology (MOOSE) group. *JAMA* 2000;283:2008-12.  
22  
23  
24 23. Arnett FC, Edworthy SM, Bloch DA, et al. The American Rheumatism  
25 Association 1987 revised criteria for the classification of rheumatoid arthritis. *Arthritis*  
26 *Rheum* 1988;31:315-24.  
27  
28  
29 24. American Thoracic Society. American Thoracic Society/European Respiratory  
30 Society international multidisciplinary consensus classification of the idiopathic  
31 interstitial pneumonias. *Am J Respir Crit Care Med* 2002;165:277-304.  
32  
33  
34 25. Travis WD, Costabel U, Hansell DM, et al. An official American Thoracic  
35 Society/European Respiratory Society statement: update of the international  
36 multidisciplinary classification of the idiopathic interstitial pneumonias. *Am J Respir*  
37 *Crit Care Med* 2013;188:733-48.  
38  
39  
40 26. Suzuki K, Sawada T, Murakami A, et al. High diagnostic performance of  
41 ELISA detection of antibodies to citrullinated antigens in rheumatoid arthritis. *Scand J*  
42 *Rheumatol* 2003;32:197-204.  
43  
44  
45  
46  
47  
48  
49  
50  
51  
52  
53  
54  
55  
56  
57  
58  
59  
60

- 1  
2  
3  
4  
5  
6 27. Lopez-Olivo MA, Siddhanamatha HR, Shea B, et al. Methotrexate for treating  
7  
8  
9  
10  
11 28. Haddaway NR, Collins AM, Coughlin D, et al. The role of google scholar in  
12  
13  
14  
15  
16  
17 29. Kamiya H, Panlaqui OM. Prognostic significance of autoantibodies for  
18  
19  
20  
21  
22  
23  
24 30. Hayden JA, Cote P, Bombardier C. Evaluation of the quality of prognosis  
25  
26  
27  
28  
29 31. Hedges LV. Distribution theory for Glass's estimator of effect size and related  
30  
31  
32  
33  
34  
35  
36  
37  
38  
39  
40 33. DerSimonian R, Laird N. Meta-analysis in clinical trials. *Control Clin Trials*  
41  
42  
43  
44  
45  
46  
47  
48  
49  
50  
51 35. Riley RD, Higgins JP, Deeks JJ. Interpretation of random effects  
52  
53  
54  
55  
56  
57  
58 36. Egger M, Davey Smith G, Schneider M, et al. Bias in meta-analysis detected  
59  
60

- 1  
2  
3  
4  
5  
6 37. Huguet A, Hayden JA, Stinson J, et al. Judging the quality of evidence in  
7 reviews of prognostic factor research: adapting the GRADE framework. *Syst Rev*  
8 2013;2:71.  
9  
10  
11  
12 38. Alunno A, Bistoni O, Pratesi F, et al. Anti-citrullinated alpha enolase  
13 antibodies, interstitial lung disease and bone erosion in rheumatoid arthritis.  
14 *Rheumatology* 2018;57:850-5.  
15  
16  
17 39. England BR, Duryee MJ, Roul P, et al. Malondialdehyde-acetaldehyde adducts  
18 and antibody responses in rheumatoid arthritis-interstitial lung disease. *Arthritis*  
19 *Rheumatol* 2019;71:1483-93.  
20  
21  
22 40. Giles JT, Danoff SK, Sokolove J, et al. Association of fine specificity and  
23 repertoire expansion of anticitrullinated peptide antibodies with rheumatoid arthritis  
24 associated interstitial lung disease. *Ann Rheum Dis* 2014;73:1487-94.  
25  
26  
27 41. Chen J, Shi Y, Wang X, et al. Asymptomatic preclinical rheumatoid  
28 arthritis-associated interstitial lung disease. *Clin Dev Immunol* 2013;2013:406927.  
29  
30  
31 42. Chen J, Doyle TJ, Liu Y, et al. Biomarkers of rheumatoid arthritis-associated  
32 interstitial lung disease. *Arthritis Rheumatol* 2015;67:28-38.  
33  
34  
35 43. Doyle TJ, Patel AS, Hatabu H, et al. Detection of rheumatoid  
36 arthritis-interstitial lung disease is enhanced by serum biomarkers. *Am J Respir Crit*  
37 *Care Med* 2015;191:1403-12.  
38  
39  
40 44. Abdel-Mageed SA-H, Foda EE, Abdel-Azeez EM, et al. Increased risk of  
41 rheumatoid arthritis-related pulmonary disease as a results of serum anticitrullinated  
42 protein antibody positivity. *Egypt J Hosp Med* 2019;76:3572-80.  
43  
44  
45 45. Akiyama M, Kaneko Y, Yamaoka K, et al. Association of disease activity with  
46 acute exacerbation of interstitial lung disease during tocilizumab treatment in patients  
47  
48  
49  
50  
51  
52  
53  
54  
55  
56  
57  
58  
59  
60

- with rheumatoid arthritis: a retrospective, case-control study. *Rheumatol Int* 2016;36:881-9.
46. Alexiou I, Germenis A, Koutroumpas A, et al. Anti-cyclic citrullinated peptide-2 (CCP2) autoantibodies and extra-articular manifestations in Greek patients with rheumatoid arthritis. *Clin Rheumatol* 2008;27:511-3.
47. Correia CS, Briones MR, Guo R, et al. Elevated anti-cyclic citrullinated peptide antibody titer is associated with increased risk for interstitial lung disease. *Clin Rheumatol* 2019;38:1201-6.
48. Fadda S, Khairy N, Fayed H, et al. Interstitial lung disease in Egyptian patients with rheumatoid arthritis: frequency, pattern and correlation with clinical manifestations and anti-citrullinated peptide antibodies level. *Egypt Rheumatol* 2018;40:155-60.
49. Furukawa H, Oka S, Shimada K, et al. Association of human leukocyte antigen with interstitial lung disease in rheumatoid arthritis: a protective role for shared epitope. *PLoS One* 2012;7:e33133.
50. Kakutani T, Hashimoto A, Tominaga A, et al. Related factors, increased mortality and causes of death in patients with rheumatoid arthritis-associated interstitial lung disease. *Mod Rheumatol* 2019:1-19.
51. Kelly CA, Saravanan V, Nisar M, et al. Rheumatoid arthritis-related interstitial lung disease: associations, prognostic factors and physiological and radiological characteristics-a large multicentre UK study. *Rheumatology* 2014;53:1676-82.
52. Liu Y, Liu C, Li L, et al. High levels of antibodies to citrullinated alpha-enolase peptide-1 (CEP-1) identify erosions and interstitial lung disease (ILD) in a Chinese rheumatoid arthritis cohort. *Clinical Immunology* 2019;200:10-5.

- 1  
2  
3  
4  
5  
6 53. Matsuo T, Hashimoto M, Ito I, et al. Interleukin-18 is associated with the  
7 presence of interstitial lung disease in rheumatoid arthritis: a cross-sectional study.  
8  
9 *Scand J Rheumatol* 2019;48:87-94.  
10  
11  
12 54. Mori S, Koga Y, Sugimoto M, et al. Different risk factors between interstitial  
13 lung disease and airway disease in rheumatoid arthritis. *Respir Med* 2012;106:1591-9.  
14  
15  
16 55. Ortancil O, Bulmus N, Ozdolap S, et al. Anti-cyclic citrullinated peptide  
17 antibodies in rheumatoid arthritis and their relationship with extra-articular  
18 manifestations. *Turk J Rheumatol* 2011;26:193-8.  
19  
20  
21  
22 56. Park WH, Kim SS, Shim SC, et al. Visual Assessment of chest computed  
23 tomography findings in anti-cyclic citrullinated peptide antibody positive rheumatoid  
24 arthritis: is it associated with airway abnormalities? *Lung* 2016;194:97-105.  
25  
26  
27  
28 57. Paulin F, Doyle TJ, Mercado JF, et al. Development of a risk indicator score  
29 for the identification of interstitial lung disease in patients with rheumatoid arthritis.  
30  
31 *Reumatol Clin* 2019;S1699-258X: 30111-1.  
32  
33  
34  
35 58. Restrepo JF, del Rincon I, Battafarano DF, et al. Clinical and laboratory factors  
36 associated with interstitial lung disease in rheumatoid arthritis. *Clin Rheumatol*  
37  
38 2015;34:1529-36.  
39  
40  
41  
42 59. Rocha-Munoz AD, Ponce-Guarneros M, Gamez-Nava JI, et al. Anti-cyclic  
43 citrullinated peptide antibodies and severity of interstitial lung disease in women with  
44  
45  
46  
47  
48  
49  
50  
51 60. Sargin G, Kose R, Senturk T. Tumor-associated antigens in rheumatoid  
52  
53  
54  
55  
56  
57  
58  
59  
60

- 1  
2  
3  
4  
5  
6 61. Sulaiman FN, Wong KK, Ahmad WAW, et al. Anti-cyclic citrullinated peptide  
7 antibody is highly associated with rheumatoid factor and radiological defects in  
8 rheumatoid arthritis patients. *Medicine* 2019;98:e14945.  
9  
10  
11  
12 62. Tian F, Li J, Tuo H, et al. The anti-mutated citrullinated vimentin antibody as a  
13 potential predictor for rheumatoid arthritis associated interstitial lung diseases. *Int J*  
14 *Clin Exp Med* 2016;9:6813-8.  
15  
16  
17 63. Wang T, Zheng XJ, Liang BM, et al. Clinical features of rheumatoid  
18 arthritis-associated interstitial lung disease. *Sci Rep* 2015;5:14897.  
19  
20  
21 64. Yang JA, Lee JS, Park JK, et al. Clinical characteristics associated with  
22 occurrence and poor prognosis of interstitial lung disease in rheumatoid arthritis.  
23 *Korean J Intern Med* 2019;34:434-41.  
24  
25  
26 65. Yin Y, Liang D, Zhao L, et al. Anti-cyclic citrullinated peptide antibody is  
27 associated with interstitial lung disease in patients with rheumatoid arthritis. *PLoS One*  
28 2014;9:e92449.  
29  
30  
31 66. Zhang J, Li J, Yu X, et al. Changes and clinical significance of serum tumor  
32 markers in patients with rheumatoid arthritis combined with interstitial lung disease. *J*  
33 *Hainan Med Univ* 2018;24:46-9.  
34  
35  
36 67. Kim EJ, Elicker BM, Maldonado F, et al. Usual interstitial pneumonia in  
37 rheumatoid arthritis-associated interstitial lung disease. *Eur Respir J* 2010;35:1322-8.  
38  
39  
40 68. Trouw LA, Mahler M. Closing the serological gap: promising novel  
41 biomarkers for the early diagnosis of rheumatoid arthritis. *Autoimmun Rev*  
42 2012;12:318-22.  
43  
44  
45  
46  
47  
48  
49  
50  
51  
52  
53  
54  
55  
56  
57  
58  
59  
60



- 1  
2  
3  
4  
5  
6 69. Taylor P, Gartemann J, Hsieh J, et al. A systematic review of serum biomarkers  
7  
8 anti-cyclic citrullinated peptide and rheumatoid factor as tests for rheumatoid arthritis.  
9  
10 *Autoimmune Dis* 2011;2011:815038.  
11  
12  
13 70. Girbal-Neuhauser E, Durieux JJ, Arnaud M, et al. The epitopes targeted by the  
14  
15 rheumatoid arthritis-associated antifilaggrin autoantibodies are posttranslationally  
16  
17 generated on various sites of (pro)filaggrin by deimination of arginine residues. *J*  
18  
19 *Immunol* 1999;162:585-94.  
20  
21  
22 71. Schellekens GA, Visser H, de Jong BA, et al. The diagnostic properties of  
23  
24 rheumatoid arthritis antibodies recognizing a cyclic citrullinated peptide. *Arthritis*  
25  
26 *Rheum* 2000;43:155-63.  
27  
28  
29 72. Swart A, Burlingame RW, Gurtler I, et al. Third generation anti-citrullinated  
30  
31 peptide antibody assay is a sensitive marker in rheumatoid factor negative rheumatoid  
32  
33 arthritis. *Clin Chim Acta* 2012;414:266-72.  
34  
35  
36 73. Turesson C, Jacobsson LT, Sturfelt G, et al. Rheumatoid factor and antibodies  
37  
38 to cyclic citrullinated peptides are associated with severe extra-articular manifestations  
39  
40 in rheumatoid arthritis. *Ann Rheum Dis* 2007;66:59-64.  
41  
42  
43 74. Sebbag M, Moinard N, Auger I, et al. Epitopes of human fibrin recognized by  
44  
45 the rheumatoid arthritis-specific autoantibodies to citrullinated proteins. *Eur J Immunol*  
46  
47 2006;36:2250-63.  
48  
49  
50 75. Mahdi H, Fisher BA, Kallberg H, et al. Specific interaction between genotype,  
51  
52 smoking and autoimmunity to citrullinated alpha-enolase in the etiology of rheumatoid  
53  
54 arthritis. *Nat Genet* 2009;41:1319-24.  
55  
56  
57 76. Boman A, Brink M, Lundquist A, et al. Antibodies against citrullinated  
58  
59 peptides are associated with clinical and radiological outcomes in patients with early  
60

1  
2  
3  
4  
5  
6 rheumatoid arthritis: a prospective longitudinal inception cohort study. *RMD Open*  
7  
8 2019;5:e000946.

9  
10 77. Scott DL, Wolfe F, Huizinga TW. Rheumatoid arthritis. *Lancet*  
11  
12 2010;376:1094-108.

13  
14 78. Perry E, Kelly C, Eggleton P, et al. The lung in ACPA-positive rheumatoid  
15  
16 arthritis: an initiating site of injury? *Rheumatology* 2014;53:1940-50.

17  
18 79. Cavagna L, Monti S, Grosso V, et al. The multifaceted aspects of interstitial  
19  
20 lung disease in rheumatoid arthritis. *Biomed Res Int* 2013;2013:759760.

21  
22 80. Brito Y, Glassberg MK, Ascherman DP. Rheumatoid arthritis-associated  
23  
24 interstitial lung disease: current concepts. *Curr Rheumatol Rep* 2017;19:79.

25  
26 81. Van Hoovels L, Jacobs J, Vander Cruyssen B, et al. Performance  
27  
28 characteristics of rheumatoid factor and anti-cyclic citrullinated peptide antibody assays  
29  
30 may impact ACR/EULAR classification of rheumatoid arthritis. *Ann Rheum Dis*  
31  
32 2018;77:667-77.  
33  
34  
35  
36  
37  
38  
39  
40  
41  
42  
43  
44  
45  
46  
47  
48  
49  
50  
51  
52  
53  
54  
55  
56  
57  
58  
59  
60

Table 1 Baseline characteristics of included studies<sup>a</sup>

| Study                | Location | Design                       | Number<br>(n) | Age (years)            | Gender (male)<br>(n (%)) | Smoking (n<br>(%)) | Proportion of ILD<br>(n (%)) <sup>b</sup> | Disease duration<br>(years)           | Disease activity <sup>c</sup>       | Other CTDS<br>(n) | ILD patterns (on<br>HRCT) (n) |
|----------------------|----------|------------------------------|---------------|------------------------|--------------------------|--------------------|-------------------------------------------|---------------------------------------|-------------------------------------|-------------------|-------------------------------|
| Alunno 2018<br>[38]  | Italy    | Cross-sectional              | 252           | 61.7±0.8               | 56 (22.2)                | -                  | 37 (20.2) (n=183)                         | 12.6±0.6                              | -                                   | -                 | -                             |
| England 2019<br>[39] | US       | Cross-sectional <sup>d</sup> | 1823          | 63.5±11.0              | (90.1)                   | (89.5)             | 90 (4.9)                                  | 11.1±11.5                             | 4.0±1.6                             | -                 | -                             |
| Giles 2014<br>[40]   | US       | Cross-sectional <sup>d</sup> | 177           | 59±8 <sup>g</sup>      | 71 (40.1)                | 105 (59.3)         | 120 (67.8)                                | 9 (5-19) vs. 8<br>(4-16) <sup>g</sup> | 3.7 (2.9-4.4) <sup>g</sup><br>(CRP) | -                 | -                             |
| Chen 2013<br>[41]    | China    | Cross-sectional              | 103           | 49.1±14.7              | 27 (26.2)                | 2 (1.9)            | 63 (61.2)                                 | 4.3±5.7                               | 4.4±1.4                             | -                 | -                             |
| Chen 2015<br>[42]    | China    | Cross-sectional              | 71            | 60.7±12.1 <sup>e</sup> | 37 (52.1)                | 35 (49.3)          | 49 (69.0)                                 | 12.8±10.3 vs.<br>8.4±8.1 (n=68)       | 3.7±1.2 vs.<br>3.3±1.7 (n=43)       | -                 | -                             |
| Doyle 2015<br>[43]   | US       | Cross-sectional <sup>d</sup> | 75            | 61.5±12.7 <sup>e</sup> | 11 (14.7)                | 41 (54.7)          | -                                         | -                                     | -                                   | -                 | -                             |
| Abdel-Hamid          | Egypt    | Cross-sectional              | 50            | 45.8±12.3              | 2 (4.0)                  | -                  | 19 (38.0)                                 | 9.8±6.6                               | 4.7±1.3                             | 0                 | -                             |

|              |        |                 |      |                        |            |            |                 |                        |                  |              |               |  |
|--------------|--------|-----------------|------|------------------------|------------|------------|-----------------|------------------------|------------------|--------------|---------------|--|
| 2019 [44]    |        |                 |      |                        |            |            |                 |                        |                  |              |               |  |
| Akiyama      | Japan  | Cross-sectional | 395  | 58.5±13.1              | 49 (12.4)  | 69 (20.3)  | 78 (19.7)       | 129.4±115.2            | 4.9±1.6 (n=372)  | 38 (SS, SSc, | -             |  |
| 2016 [45]    |        |                 |      |                        |            | (n=340)    |                 | (months)               |                  | PM/DM,       |               |  |
|              |        |                 |      |                        |            |            |                 |                        |                  | SLE)         |               |  |
| Alixiou 2008 | Greece | Case-control    | 136  | -                      | -          | -          | N/A (ILD 11/no  | -                      | -                | -            | -             |  |
| [46]         |        |                 |      |                        |            |            | ILD 125)        |                        |                  |              |               |  |
| Correia 2019 | US     | Cross-sectional | 453  | 59.6±15.7              | (19.4)     | -          | (6.0)           | -                      | -                | 0            | -             |  |
| [47]         |        |                 |      |                        |            |            |                 |                        |                  |              |               |  |
| Fadda 2018   | Egypt  | Cross-sectional | 88   | 50.2±9.0               | 13 (14.8)  | 87 (98.9)  | 63 (71.6)       | 10.2±6.2               | 14 (1-32) vs. 12 | 0            | UIP 62%, NSIP |  |
| [48]         |        |                 |      |                        |            |            |                 |                        | (3-25) (median   |              | 27%, Mixed 1% |  |
|              |        |                 |      |                        |            |            |                 |                        | (range)) (CDAI)  |              |               |  |
| Furukawa     | Japan  | Case-control    | 450  | 63.9±10.9 <sup>e</sup> | 89 (19.8)  | 130 (28.9) | N/A (ILD 129/no | 14.5±10.9 <sup>e</sup> | -                | -            | -             |  |
| 2012 [49]    |        |                 |      |                        |            |            | ILD 321)        |                        |                  |              |               |  |
| Kakutani     | Japan  | Cross-sectional | 2702 | 62.8±12.5              | (17.8)     | (28.9)     | 261 (9.7)       | 9 (15) vs. 10 (17)     | 3.2±1.0 (ESR)    | -            | -             |  |
| 2019 [50]    |        |                 |      |                        |            |            |                 | (median (IQR))         |                  |              |               |  |
| Kelly 2014   | UK     | Case-control    | 460  | -                      | 220 (47.8) | -          | N/A (ILD 230/no | -                      | -                | -            | -             |  |

1  
2  
3  
4  
5  
6  
7  
8  
9  
10  
11  
12  
13  
14  
15  
16  
17  
18  
19  
20  
21  
22  
23  
24  
25  
26  
27  
28  
29  
30  
31  
32  
33  
34  
35  
36  
37  
38  
39  
40  
41  
42  
43  
44  
45  
46

---

|                    |           |                 |     |                                                                        |           |           |                 |                                                        |               |                       |   |                           |
|--------------------|-----------|-----------------|-----|------------------------------------------------------------------------|-----------|-----------|-----------------|--------------------------------------------------------|---------------|-----------------------|---|---------------------------|
| [51]               |           |                 |     |                                                                        |           |           |                 | ILD 230)                                               |               |                       |   |                           |
| Liu 2019 [52]      | China     | Cross-sectional | 101 | 54 (17)<br>(median<br>(IQR))                                           | 26 (25.7) | -         | 23 (22.8)       | 7 (14) (median<br>(IQR))                               | 4.0±1.9       | -                     | - |                           |
| Matsuo 2018 [53]   | Japan     | Cross-sectional | 312 | 63.5±12.7                                                              | 41 (13.1) | 95 (30.4) | 26 (8.3)        | 14.9±11.6                                              | 2.5±1.1 (CRP) | 11 (not<br>specified) | - |                           |
| Mori 2012 [54]     | Japan     | Cross-sectional | 356 | 72.5 (12.3)<br>(n=24) vs.<br>59.0 (16)<br>(n=302)<br>(median<br>(IQR)) | 85 (23.9) | 76 (21.3) | 24 (6.7)        | 1.5 (6.3) (n=24)<br>vs 0 (6) (n=302)<br>(median (IQR)) | -             | -                     | - | UIP 5, NSIP 19            |
| Ortancil 2011 [55] | Turkey    | Cross-sectional | 67  | 57.4±13.5                                                              | 14 (20.9) | -         | 12 (17.9)       | 10.2±11.7 <sup>e</sup>                                 | -             | -                     | - |                           |
| Park 2016 [56]     | Korea     | Cross-sectional | 83  | 53.7±10.1 <sup>e</sup>                                                 | 10 (12.0) | -         | 7 (8.4)         | -                                                      | -             | -                     | - | UIP 6,<br>Indeterminate 1 |
| Paulin 2019        | Argentina | Case-control    | 118 | 56.7±15.7                                                              | 26 (22.0) | 52 (44.1) | N/A (ILD 52/ no | -                                                      | 3.4±1.1       | -                     | - |                           |

---

|    |             |          |                 |     |                        |            |            |                |                        |                      |   |   |
|----|-------------|----------|-----------------|-----|------------------------|------------|------------|----------------|------------------------|----------------------|---|---|
| 1  |             |          |                 |     |                        |            |            |                |                        |                      |   |   |
| 2  |             |          |                 |     |                        |            |            |                |                        |                      |   |   |
| 3  |             |          |                 |     |                        |            |            |                |                        |                      |   |   |
| 4  |             |          |                 |     |                        |            |            |                |                        |                      |   |   |
| 5  | [57]        |          |                 |     |                        |            |            | ILD 66)        |                        |                      |   |   |
| 6  |             |          |                 |     |                        |            |            |                |                        |                      |   |   |
| 7  | Restrepo    | US       | Cross-sectional | 779 | 53.7±13.3              | 161 (25.5) | 357 (56.5) | 69 (8.9)       | 10.5±10.3 <sup>e</sup> | 5.4±1.4 <sup>e</sup> | - | - |
| 8  |             |          |                 |     |                        |            |            |                |                        |                      |   |   |
| 9  | 2015 [58]   |          |                 |     | (n=632) <sup>e</sup>   | (n=632)    | (n=632)    |                |                        |                      |   |   |
| 10 |             |          |                 |     |                        |            |            |                |                        |                      |   |   |
| 11 | Rocha-Munoz | Mexico   | Case-control    | 81  | 51.0                   | -          | 22 (27.2)  | N/A (ILD 39/no | 7.0 (1.0-35.0) vs.     | 3.9 (1.7-5.3) vs.    | 0 | - |
| 12 |             |          |                 |     |                        |            |            |                |                        |                      |   |   |
| 13 | 2015 [59]   |          |                 |     | (36.0-72.0)            |            |            | ILD 42)        | 6.5 (0.75-25.0)        | 2.5 (1.7-5.1)        |   |   |
| 14 |             |          |                 |     | vs. 49.0               |            |            |                | (median (range))       | (median (range))     |   |   |
| 15 |             |          |                 |     |                        |            |            |                |                        |                      |   |   |
| 16 |             |          |                 |     | (24.0-73.0)            |            |            |                |                        |                      |   |   |
| 17 |             |          |                 |     |                        |            |            |                |                        |                      |   |   |
| 18 |             |          |                 |     | (median                |            |            |                |                        |                      |   |   |
| 19 |             |          |                 |     | (range))               |            |            |                |                        |                      |   |   |
| 20 |             |          |                 |     |                        |            |            |                |                        |                      |   |   |
| 21 |             |          |                 |     |                        |            |            |                |                        |                      |   |   |
| 22 | Sargin 2018 | Turkey   | Cross-sectional | 83  | 59.3±12.1              | 20 (24.1)  | 9 (10.8)   | 43 (51.8)      | -                      | -                    | 0 | - |
| 23 |             |          |                 |     |                        |            |            |                |                        |                      |   |   |
| 24 | [60]        |          |                 |     |                        |            |            |                |                        |                      |   |   |
| 25 |             |          |                 |     |                        |            |            |                |                        |                      |   |   |
| 26 | Sulaiman    | Malaysia | Cross-sectional | 159 | 48.3±14.1              | 25 (15.7)  | -          | 21 (13.2)      | -                      | 4.7±0.9 (ESR)        | 0 | - |
| 27 |             |          |                 |     |                        |            |            |                |                        |                      |   |   |
| 28 | 2019 [61]   |          |                 |     |                        |            |            |                |                        |                      |   |   |
| 29 |             |          |                 |     |                        |            |            |                |                        |                      |   |   |
| 30 | Tian 2016   | China    | Cross-sectional | 75  | -                      | 29 (38.7)  | -          | 37 (49.3)      | -                      | -                    | - | - |
| 31 |             |          |                 |     |                        |            |            |                |                        |                      |   |   |
| 32 | [62]        |          |                 |     |                        |            |            |                |                        |                      |   |   |
| 33 |             |          |                 |     |                        |            |            |                |                        |                      |   |   |
| 34 | Wang 2015   | China    | Cross-sectional | 41  | 60.7±12.4 <sup>e</sup> | 20 (48.8)  | -          | 25 (61.0)      | 108 (5-360) vs. 72     | -                    | - | - |
| 35 |             |          |                 |     |                        |            |            |                |                        |                      |   |   |
| 36 | [63]        |          |                 |     |                        |            |            |                | (2-552) (months)       |                      |   |   |
| 37 |             |          |                 |     |                        |            |            |                |                        |                      |   |   |

|    |               |       |                 |     |                        |           |           |                 |                       |         | (median (range))        |   |  |
|----|---------------|-------|-----------------|-----|------------------------|-----------|-----------|-----------------|-----------------------|---------|-------------------------|---|--|
| 7  | Yang 2019     | Korea | Case-control    | 308 | 57.0±12.0 <sup>e</sup> | 76 (24.7) | 39 (17.7) | N/A (ILD 77/ no | 11.0±7.3 <sup>e</sup> | -       | -                       | - |  |
| 8  | [64]          |       |                 |     |                        |           | (n=220)   | ILD 231)        |                       |         |                         |   |  |
| 11 | Yin 2014 [65] | China | Cross-sectional | 285 | 51.7±13.4 <sup>e</sup> | 74 (26.0) | 59 (20.7) | 71 (24.9)       | 9.0 (16.0) vs. 4.0    | 5.4±1.7 | 61 <sup>f</sup> (SS 41, | - |  |
| 12 |               |       |                 |     |                        |           |           |                 | (9.1) (median         |         | SSc 7,                  |   |  |
| 13 |               |       |                 |     |                        |           |           |                 | (IQR))                |         | PM/DM 4,                |   |  |
| 14 |               |       |                 |     |                        |           |           |                 |                       |         | SLE 16)                 |   |  |
| 15 |               |       |                 |     |                        |           |           |                 |                       |         |                         |   |  |
| 16 |               |       |                 |     |                        |           |           |                 |                       |         |                         |   |  |
| 17 |               |       |                 |     |                        |           |           |                 |                       |         |                         |   |  |
| 18 | Zhang 2018    | China | Case-control    | 75  | 41-69 vs.              | 30 (40.0) | -         | N/A (ILD 28/ no | -                     | -       | 0                       | - |  |
| 19 | [66]          |       |                 |     | 40-70                  |           |           | ILD 47)         |                       |         |                         |   |  |
| 20 |               |       |                 |     | (range)                |           |           |                 |                       |         |                         |   |  |
| 21 |               |       |                 |     |                        |           |           |                 |                       |         |                         |   |  |
| 22 |               |       |                 |     |                        |           |           |                 |                       |         |                         |   |  |
| 23 |               |       |                 |     |                        |           |           |                 |                       |         |                         |   |  |

a, Comparisons correspond to RA-ILD vs. RA without ILD and the values are expressed as mean±SD or number (proportion) unless otherwise specified;

b, N/A indicates not applicable due to case-control studies;

c, Disease activity was estimated using disease activity score (DAS) 28 unless otherwise specified and a laboratory marker used to calculate the score was described as either ESR or CRP if it was specified;

d, indicates a prospective study while all of the other studies are retrospectively designed;

e, calculated combining the figure in both comparative groups;

1  
2  
3  
4 f, some patients had multiple CTDs;  
5

6  
7 g, unknown statistics;  
8

9 CDAI, clinical disease activity index; CRP, C-reactive protein; CTD, connective tissue disease; ESR, erythrocyte sedimentation rate; HRCT, high  
10 resolution computed tomography; ILD, interstitial lung disease; IQR, interquartile range; NSIP, non-specific interstitial pneumonia;  
11 PM/DM, polymyositis/dermatomyositis; RA, rheumatoid arthritis; SLE, systemic lupus erythematosus; SS, Sjögren syndrome; SSc,  
12 systemic sclerosis; UIP, usual interstitial pneumonia;  
13  
14  
15  
16  
17  
18  
19  
20  
21  
22  
23  
24  
25  
26  
27  
28  
29  
30  
31  
32  
33  
34  
35  
36  
37  
38  
39  
40  
41  
42  
43  
44  
45  
46



Table 2 Anti-cyclic citrullinated peptide (CCP) antibody tests and its association with rheumatoid arthritis-associated interstitial lung disease<sup>a</sup>

| Study             | Measurements of anti-CCP antibody (manufacturer) (cut-off points) | Proportion of anti-CCP antibody | Titres of anti-CCP antibody                              | Univariate result (positivity) | Univariate result (titre)   | Multivariate result (positivity) | Multivariate result (titre) | Adjusted variables |
|-------------------|-------------------------------------------------------------------|---------------------------------|----------------------------------------------------------|--------------------------------|-----------------------------|----------------------------------|-----------------------------|--------------------|
| Alunno 2018 [38]  | Second generation (Thermo Fisher Scientific or Aesku)             | 28/37 (75.7) vs. 90/146 (61.6)  | -                                                        | OR 1.94 (0.85-4.42)            | -                           | -                                | -                           | -                  |
| England 2019 [39] | Second generation                                                 | (86.7) vs. (76.7)               | -                                                        | <b>OR 1.98, p=0.03</b>         | -                           | -                                | -                           | -                  |
| Giles 2014 [40]   | Second generation                                                 | 51/57 (89.5) vs. 82/120 (68.3)  | 152 (99-194) (n=32) vs. 89 (11-152) (n=120) <sup>d</sup> | <b>OR 3.94 (1.57-9.90)</b>     | <b>p=0.0005<sup>b</sup></b> | -                                | -                           | -                  |
| Chen 2013 [41]    | Not specified                                                     | -                               | 231.8±178.0 (n=63) vs. 196.8±161.1 (n=40)                | -                              | MD 35.0 (-33.0-103.0)       | -                                | -                           | -                  |
| Chen 2015 [42]    | Not specified                                                     | -                               | 142.6±151.9 (n=49) vs. 154.6±151.4 (n=22)                | -                              | MD -12.0 (-88.2-64.2)       | -                                | -                           | -                  |

|    |              |                     |                  |                         |                            |                           |                   |                       |                       |
|----|--------------|---------------------|------------------|-------------------------|----------------------------|---------------------------|-------------------|-----------------------|-----------------------|
| 1  |              |                     |                  |                         |                            |                           |                   |                       |                       |
| 2  |              |                     |                  |                         |                            |                           |                   |                       |                       |
| 3  |              |                     |                  |                         |                            |                           |                   |                       |                       |
| 4  |              |                     |                  |                         |                            |                           |                   |                       |                       |
| 5  | Doyle 2015   | Not specified       | -                | 188±133 vs. 83±113      | -                          | -                         | -                 | -                     | -                     |
| 6  | [43]         |                     |                  |                         |                            |                           |                   |                       |                       |
| 7  |              |                     |                  |                         |                            |                           |                   |                       |                       |
| 8  | Abdel-Hamid  | Third generation    | 30/50 (60.0)     | 100 (390) (n=19) vs. 20 | -                          | <b>p=0.04<sup>b</sup></b> | -                 | -                     | -                     |
| 9  | 2019 [44]    |                     |                  | (298) (n=31) (median    |                            |                           |                   |                       |                       |
| 10 |              |                     |                  | (IQR))                  |                            |                           |                   |                       |                       |
| 11 |              |                     |                  |                         |                            |                           |                   |                       |                       |
| 12 |              |                     |                  |                         |                            |                           |                   |                       |                       |
| 13 |              |                     |                  |                         |                            |                           |                   |                       |                       |
| 14 | Akiyama      | Not specified (≥4.5 | 69/75 (92.0) vs. | -                       | <b>OR 2.82 (1.17-6.81)</b> | -                         | OR 1.80           | -                     | age, sex, smoking, RF |
| 15 | 2016 [45]    | U/mL)               | 245/305 (80.3)   |                         |                            |                           | (0.70-4.40)       |                       |                       |
| 16 |              |                     |                  |                         |                            |                           | (positive with    |                       |                       |
| 17 |              |                     |                  |                         |                            |                           | high titre (>13.5 |                       |                       |
| 18 |              |                     |                  |                         |                            |                           | U/mL))            |                       |                       |
| 19 |              |                     |                  |                         |                            |                           |                   |                       |                       |
| 20 |              |                     |                  |                         |                            |                           |                   |                       |                       |
| 21 |              |                     |                  |                         |                            |                           |                   |                       |                       |
| 22 |              |                     |                  |                         |                            |                           |                   |                       |                       |
| 23 |              |                     |                  |                         |                            |                           |                   |                       |                       |
| 24 | Alexiou 2008 | Second generation   | 10/11 (90.9) vs. | 152.6±104.5 (n=11) vs.  | OR 7.12 (0.89-56.9)        | <b>MD 79.5</b>            | -                 | -                     | -                     |
| 25 | [46]         | (INOVA Diagnostics) | 73/125 (58.4)    | 73.1±114.0 (n=125)      |                            | <b>(9.72-149.3)</b>       |                   |                       |                       |
| 26 |              | (20 IU/mL)          |                  |                         |                            |                           |                   |                       |                       |
| 27 |              |                     |                  |                         |                            |                           |                   |                       |                       |
| 28 |              |                     |                  |                         |                            |                           |                   |                       |                       |
| 29 |              |                     |                  |                         |                            |                           |                   |                       |                       |
| 30 | Correia 2019 | Second generation   | -                | 113.0±5.9 (162.4 vs.    | OR 1.51 (0.48-4.74)        | <b>p=0.04<sup>b</sup></b> | -                 | <b>OR 1.41</b>        | age, smoking          |
| 31 | [47]         | (Euro-Diagnostica)  |                  | 109.9) (mean±SE)        | (low titre), 2.61          |                           |                   | <b>(1.01-1.97)/1</b>  |                       |
| 32 |              | (≥6 U/mL)           |                  |                         | (0.59-11.5)( moderate      |                           |                   | <b>group of titre</b> |                       |
| 33 |              |                     |                  |                         | titre), 2.83 (0.96-8.39)   |                           |                   |                       |                       |
| 34 |              |                     |                  |                         | (high titre)               |                           |                   |                       |                       |
| 35 |              |                     |                  |                         |                            |                           |                   |                       |                       |
| 36 |              |                     |                  |                         |                            |                           |                   |                       |                       |
| 37 |              |                     |                  |                         |                            |                           |                   |                       |                       |
| 38 |              |                     |                  |                         |                            |                           |                   |                       |                       |

|    |               |                     |                    |                        |                            |                           |                 |   |                       |
|----|---------------|---------------------|--------------------|------------------------|----------------------------|---------------------------|-----------------|---|-----------------------|
| 1  |               |                     |                    |                        |                            |                           |                 |   |                       |
| 2  |               |                     |                    |                        |                            |                           |                 |   |                       |
| 3  |               |                     |                    |                        |                            |                           |                 |   |                       |
| 4  |               |                     |                    |                        |                            |                           |                 |   |                       |
| 5  | Fadda 2018    | Third generation    | 84/88 (95.5)       | 220 (0-500) (n=63) vs. | -                          | <b>MD 67.5</b>            | -               | - | -                     |
| 6  | [48]          | (INOVA Diagnostics) |                    | 120 (30-400) (n=25),   |                            | <b>(19.5-115.5),</b>      |                 |   |                       |
| 7  |               | (20 U/mL)           |                    | (median (range))       |                            | <b>OR1.006</b>            |                 |   |                       |
| 8  |               |                     |                    |                        |                            | <b>(1.001-1.011)</b>      |                 |   |                       |
| 9  |               |                     |                    |                        |                            | <b>(/1 U/mL)</b>          |                 |   |                       |
| 10 |               |                     |                    |                        |                            |                           |                 |   |                       |
| 11 |               |                     |                    |                        |                            |                           |                 |   |                       |
| 12 |               |                     |                    |                        |                            |                           |                 |   |                       |
| 13 |               |                     |                    |                        |                            |                           |                 |   |                       |
| 14 | Furukawa      | Not specified       | 116/129 (89.9) vs. | -                      | OR 1.38 (0.71-2.69)        | -                         | -               | - | -                     |
| 15 | 2012 [49]     | (Medical &          | 278/321 (86.6)     |                        |                            |                           |                 |   |                       |
| 16 |               | Biological          |                    |                        |                            |                           |                 |   |                       |
| 17 |               | Laboratories)       |                    |                        |                            |                           |                 |   |                       |
| 18 |               |                     |                    |                        |                            |                           |                 |   |                       |
| 19 |               |                     |                    |                        |                            |                           |                 |   |                       |
| 20 |               |                     |                    |                        |                            |                           |                 |   |                       |
| 21 | Kakutani      | Not specified       | (93.2) vs. (82.9)  | -                      | <b>OR 2.83, p=0.002</b>    | -                         | -               | - | -                     |
| 22 | 2019 [50]     |                     |                    |                        |                            |                           |                 |   |                       |
| 23 |               |                     |                    |                        |                            |                           |                 |   |                       |
| 24 |               |                     |                    |                        |                            |                           |                 |   |                       |
| 25 |               |                     |                    |                        |                            |                           |                 |   |                       |
| 26 | Kelly 2014    | Not specified       | -                  | 180 (8-340) vs. 78     | <b>OR 4.00 (2.00-7.80)</b> | <b>p=0.02<sup>b</sup></b> | <b>OR 0.33,</b> | - | age, sex, smoking, RF |
| 27 | [51]          |                     |                    | (8-340) (median        |                            |                           | <b>p=0.003</b>  |   |                       |
| 28 |               |                     |                    | (range))               |                            |                           |                 |   |                       |
| 29 |               |                     |                    |                        |                            |                           |                 |   |                       |
| 30 |               |                     |                    |                        |                            |                           |                 |   |                       |
| 31 | Liu 2019 [52] | Second generation   | 77/101 (76.2)      | -                      | OR 0.64 (0.23-1.80)        | -                         | -               | - | -                     |
| 32 |               | (Euro- Diagnostica) |                    |                        |                            |                           |                 |   |                       |
| 33 |               | (≥25 U/mL)          |                    |                        |                            |                           |                 |   |                       |
| 34 |               |                     |                    |                        |                            |                           |                 |   |                       |
| 35 |               |                     |                    |                        |                            |                           |                 |   |                       |
| 36 |               |                     |                    |                        |                            |                           |                 |   |                       |
| 37 |               |                     |                    |                        |                            |                           |                 |   |                       |
| 38 |               |                     |                    |                        |                            |                           |                 |   |                       |
| 39 |               |                     |                    |                        |                            |                           |                 |   |                       |
| 40 |               |                     |                    |                        |                            |                           |                 |   |                       |
| 41 |               |                     |                    |                        |                            |                           |                 |   |                       |
| 42 |               |                     |                    |                        |                            |                           |                 |   |                       |
| 43 |               |                     |                    |                        |                            |                           |                 |   |                       |
| 44 |               |                     |                    |                        |                            |                           |                 |   |                       |
| 45 |               |                     |                    |                        |                            |                           |                 |   |                       |
| 46 |               |                     |                    |                        |                            |                           |                 |   |                       |

|    |               |                      |                  |                        |                            |                      |                 |                    |                      |
|----|---------------|----------------------|------------------|------------------------|----------------------------|----------------------|-----------------|--------------------|----------------------|
| 1  |               |                      |                  |                        |                            |                      |                 |                    |                      |
| 2  |               |                      |                  |                        |                            |                      |                 |                    |                      |
| 3  |               |                      |                  |                        |                            |                      |                 |                    |                      |
| 4  |               |                      |                  |                        |                            |                      |                 |                    |                      |
| 5  | Matsuo 2018   | Not specified        | 25/26 (96.2) vs. | 199.7±104.6 (n=26) vs. | <b>OR 5.43 (1.11-98.0)</b> | <b>MD 79.0</b>       | -               | <b>OR 1.08</b>     | age, smoking, RF,    |
| 6  | [53]          |                      | 235/286 (82.2)   | 120.7±112.6 (n=286)    |                            | <b>(34.1-123.9),</b> |                 | <b>(1.03-1.12)</b> | LDH, CRP, ESR,       |
| 7  |               |                      |                  |                        |                            | <b>OR 1.06</b>       |                 | <b>(/10U/mL)</b>   | KL-6, MMP-3, IL18,   |
| 8  |               |                      |                  |                        |                            | <b>(1.02-1.10)</b>   |                 |                    | dose of MTX, dose of |
| 9  |               |                      |                  |                        |                            | <b>(/10U/mL)</b>     |                 |                    | PSL                  |
| 10 |               |                      |                  |                        |                            |                      |                 |                    |                      |
| 11 |               |                      |                  |                        |                            |                      |                 |                    |                      |
| 12 |               |                      |                  |                        |                            |                      |                 |                    |                      |
| 13 |               |                      |                  |                        |                            |                      |                 |                    |                      |
| 14 | Mori 2012     | Second generation    | 24/24 (100) vs.  | 283.5 (695) (n=24) vs. | OR 6.41 (0.38-107.8)       | <b>MD 275.2</b>      | RR 2.73         | -                  | age, sex, smoking,   |
| 15 | [54]          | (Axis-Shield         | 294/332 (88.6)   | 81.1 (228) (n=302)     |                            | <b>(184.1-366.3)</b> | (0.91-8.23)     |                    | advanced stage, RF,  |
| 16 |               | Diagnostic) (>4.6    |                  | (median (IQR)          |                            |                      | (positive with  |                    | HLA-DRB1*04,         |
| 17 |               | U/mL)                |                  |                        |                            |                      | high titre (≥90 |                    | HLA-DRB1*1502        |
| 18 |               |                      |                  |                        |                            |                      | U/mL))          |                    |                      |
| 19 |               |                      |                  |                        |                            |                      |                 |                    |                      |
| 20 |               |                      |                  |                        |                            |                      |                 |                    |                      |
| 21 |               |                      |                  |                        |                            |                      |                 |                    |                      |
| 22 |               |                      |                  |                        |                            |                      |                 |                    |                      |
| 23 | Ortancil 2011 | Second generation    | 7/12 (58.3) vs.  | -                      | OR 1.45 (0.41-5.08)        | -                    | -               | -                  | -                    |
| 24 | [55]          | (Euroimmun)          | 27/55 (49.1)     |                        |                            |                      |                 |                    |                      |
| 25 |               |                      |                  |                        |                            |                      |                 |                    |                      |
| 26 |               |                      |                  |                        |                            |                      |                 |                    |                      |
| 27 | Park 2016     | Not specified (Roche | 69/83 (83.1)     | -                      | -                          | 0.22 <sup>c</sup>    | -               | -                  | -                    |
| 28 | [56]          | Diagnostics) (≥17.0  |                  |                        |                            |                      |                 |                    |                      |
| 29 |               | U/mL)                |                  |                        |                            |                      |                 |                    |                      |
| 30 |               |                      |                  |                        |                            |                      |                 |                    |                      |
| 31 |               |                      |                  |                        |                            |                      |                 |                    |                      |
| 32 |               |                      |                  |                        |                            |                      |                 |                    |                      |
| 33 | Paulin 2019   | Second generation    | 45/47 (95.7) vs. | -                      | OR 0.98 (0.13-7.24)        | -                    | -               | -                  | -                    |
| 34 | [57]          |                      | 46/48 (95.8)     |                        |                            |                      |                 |                    |                      |
| 35 |               |                      |                  |                        |                            |                      |                 |                    |                      |
| 36 |               |                      |                  |                        |                            |                      |                 |                    |                      |
| 37 |               |                      |                  |                        |                            |                      |                 |                    |                      |
| 38 |               |                      |                  |                        |                            |                      |                 |                    |                      |
| 39 |               |                      |                  |                        |                            |                      |                 |                    |                      |
| 40 |               |                      |                  |                        |                            |                      |                 |                    |                      |
| 41 |               |                      |                  |                        |                            |                      |                 |                    |                      |
| 42 |               |                      |                  |                        |                            |                      |                 |                    |                      |
| 43 |               |                      |                  |                        |                            |                      |                 |                    |                      |
| 44 |               |                      |                  |                        |                            |                      |                 |                    |                      |
| 45 |               |                      |                  |                        |                            |                      |                 |                    |                      |
| 46 |               |                      |                  |                        |                            |                      |                 |                    |                      |

|    |             |                    |                  |                          |                             |                               |                    |               |                       |
|----|-------------|--------------------|------------------|--------------------------|-----------------------------|-------------------------------|--------------------|---------------|-----------------------|
| 1  |             |                    |                  |                          |                             |                               |                    |               |                       |
| 2  |             |                    |                  |                          |                             |                               |                    |               |                       |
| 3  |             |                    |                  |                          |                             |                               |                    |               |                       |
| 4  |             |                    |                  |                          |                             |                               |                    |               |                       |
| 5  | Restrepo    | Not specified      | 44/69 (63.8) vs. | 5.54±1.49 (n=69) vs.     | OR 1.15 (0.69-1.91)         | <b>MD 0.86</b>                | Not specified      | Not specified | age, sex, disease     |
| 6  | 2015 [58]   | (TheraTest) (≥7    | 341/563 (60.6)   | 4.68±1.52 (n=563) (log   |                             | <b>(0.49-1.23) (log</b>       |                    |               | duration, DAS28, RF,  |
| 7  |             | IU/mL)             |                  | anti-CCP antibody titre) |                             | <b>anti-CCP</b>               |                    |               | HLA-DRB1*SE, PSL      |
| 8  |             |                    |                  |                          |                             | <b>antibody titre)</b>        |                    |               | use                   |
| 9  |             |                    |                  |                          |                             |                               |                    |               |                       |
| 10 |             |                    |                  |                          |                             |                               |                    |               |                       |
| 11 |             |                    |                  |                          |                             |                               |                    |               |                       |
| 12 | Rocha-Munoz | Second generation  | 39/39 (100) vs.  | 77.9 vs. 30.2 (median)   | <b>OR 44.5 (2.54-778.3)</b> | <b>p&lt;0.001<sup>b</sup></b> | <b>OR 1.06</b>     | -             | age, smoking, disease |
| 13 | 2015 [59]   | (Euroimmun) (>20   | 27/42 (64.3)     |                          |                             |                               | <b>(1.02-1.10)</b> |               | duration, , DAS28,    |
| 14 |             | U/mL)              |                  |                          |                             |                               |                    |               | HAQ-Di, RF, ESR,      |
| 15 |             |                    |                  |                          |                             |                               |                    |               | duration of MTX       |
| 16 |             |                    |                  |                          |                             |                               |                    |               | treatment             |
| 17 |             |                    |                  |                          |                             |                               |                    |               |                       |
| 18 |             |                    |                  |                          |                             |                               |                    |               |                       |
| 19 |             |                    |                  |                          |                             |                               |                    |               |                       |
| 20 |             |                    |                  |                          |                             |                               |                    |               |                       |
| 21 | Sargin 2018 | Not specified      | -                | 19.5 (139) (n=43) vs.    | -                           | MD 9.8                        | -                  | -             | -                     |
| 22 | [60]        |                    |                  | 6.2 (125.4) (n=40)       |                             | (-34.1-53.7)                  |                    |               |                       |
| 23 |             |                    |                  | (median (IQR))           |                             |                               |                    |               |                       |
| 24 |             |                    |                  |                          |                             |                               |                    |               |                       |
| 25 |             |                    |                  |                          |                             |                               |                    |               |                       |
| 26 |             |                    |                  |                          |                             |                               |                    |               |                       |
| 27 | Sulaiman    | Second generation  | 13/21 (61.9) vs. | -                        | OR 1.58 (0.62-4.05)         | -                             | -                  | -             | -                     |
| 28 | 2019 [61]   | (Euro-Diagnostica) | 70/138 (50.7)    |                          |                             |                               |                    |               |                       |
| 29 |             | (≥20.0 U/mL)       |                  |                          |                             |                               |                    |               |                       |
| 30 |             |                    |                  |                          |                             |                               |                    |               |                       |
| 31 |             |                    |                  |                          |                             |                               |                    |               |                       |
| 32 |             |                    |                  |                          |                             |                               |                    |               |                       |
| 33 | Tian 2016   | Not specified      | 30/37 (81.1) vs. | 475.2±551.8 (n=37) vs.   | OR 1.53 (0.51-4.59)         | MD 143.2                      | -                  | -             | -                     |
| 34 | [62]        | (Euroimmun) (≥25   | 28/38 (73.7)     | 332.0±418.6 (n=38)       |                             | (-78.1-364.5)                 |                    |               |                       |
| 35 |             | RU/mL)             |                  |                          |                             |                               |                    |               |                       |
| 36 |             |                    |                  |                          |                             |                               |                    |               |                       |
| 37 |             |                    |                  |                          |                             |                               |                    |               |                       |
| 38 |             |                    |                  |                          |                             |                               |                    |               |                       |
| 39 |             |                    |                  |                          |                             |                               |                    |               |                       |
| 40 |             |                    |                  |                          |                             |                               |                    |               |                       |
| 41 |             |                    |                  |                          |                             |                               |                    |               |                       |
| 42 |             |                    |                  |                          |                             |                               |                    |               |                       |
| 43 |             |                    |                  |                          |                             |                               |                    |               |                       |
| 44 |             |                    |                  |                          |                             |                               |                    |               |                       |
| 45 |             |                    |                  |                          |                             |                               |                    |               |                       |
| 46 |             |                    |                  |                          |                             |                               |                    |               |                       |

|                    |                                                       |                                   |                                                                                   |                            |                                        |                                      |   |                       |
|--------------------|-------------------------------------------------------|-----------------------------------|-----------------------------------------------------------------------------------|----------------------------|----------------------------------------|--------------------------------------|---|-----------------------|
| Wang 2015<br>[63]  | Not specified                                         | -                                 | 296.4 (1.91-500.0)<br>(n=25) vs. 392.9<br>(7.00-500.0) (n=16)<br>(median (range)) | -                          | MD -49.5<br>(-132.2-33.2)              | -                                    | - | -                     |
| Yang 2019<br>[64]  | Not specified ( $\geq 5.0$<br>IU/mL)                  | 33/43 (76.7) vs.<br>95/142 (66.9) | 242.8 $\pm$ 234.4 (n=43) vs.<br>125.3 $\pm$ 144.3 (n=142)                         | OR 1.63 (0.74-3.57)        | <b>MD 117.5</b><br><b>(59.7-175.3)</b> | -                                    | - | -                     |
| Yin 2014 [65]      | Second generation<br>(Euroimmun) ( $\geq 25$<br>U/mL) | 207/285 (72.6)                    | -                                                                                 | <b>OR 3.83 (1.74-8.43)</b> | -                                      | <b>OR 3.50</b><br><b>(1.52-8.04)</b> | - | age, disease duration |
| Zhang 2018<br>[66] | Not specified                                         | -                                 | 3.09 $\pm$ 0.34 (n=28) vs.<br>3.05 $\pm$ 0.32 (n=47)                              | -                          | MD 0.04<br>(-0.12-0.20)                | -                                    | - | -                     |

a, Comparisons correspond to RA-ILD vs. RA without ILD and the values are expressed as mean $\pm$ SD or number (proportion) unless otherwise specified. The value with an interval in the parenthesis indicates 95% confidence interval. Text in bold indicates statistical significance;

b, the difference of the titre of anti-CCP antibody between RA with and without ILD could not be calculated due to unavailability of relevant summary statistics, no information of the number of subjects and/or unknown summary statistics;

c, indicates correlation coefficient between anti-CCP antibody and a total ILD score;

d, unknown statistics;

1  
2  
3  
4 CCP, cyclic citrullinated peptide; CRP, C-reactive protein; DAS28, disease activity score 28; ESR, erythrocyte sedimentation rate;  
5  
6 HAQ-Di, health assessment questionnaire-disability index; HLA, human leukocyte antigen; IL-18, interleukin-18; ILD, interstitial lung  
7  
8 disease; IQR, interquartile range; KL-6, Krebs von den Lungen-6; LDH, lactate dehydrogenase; MD, mean difference; MMP-3, matrix  
9  
10 metalloproteinase-3; MTX, methotrexate; OR, odds ratio; PSL, prednisolone; RA, rheumatoid arthritis; RF, rheumatoid factor; RR, risk  
11  
12 ratio; SE, shared epitope;  
13  
14  
15  
16  
17  
18  
19  
20  
21  
22  
23  
24  
25  
26  
27  
28  
29  
30  
31  
32  
33  
34  
35  
36  
37  
38  
39  
40  
41  
42  
43  
44  
45  
46

For peer review only

Table 3 Risk of bias in individual studies

| Study                 | Study participation | Anti-CCP antibody measurement | ILD confirmation | Study confounding | Statistical analysis and reporting |
|-----------------------|---------------------|-------------------------------|------------------|-------------------|------------------------------------|
| Alunno 2018 [38]      | moderate risk       | low risk                      | <b>high risk</b> | <b>high risk</b>  | <b>high risk</b>                   |
| England 2019 [39]     | moderate risk       | <b>high risk</b>              | <b>high risk</b> | low risk          | <b>high risk</b>                   |
| Giles 2014 [40]       | moderate risk       | low risk                      | <b>high risk</b> | moderate risk     | <b>high risk</b>                   |
| Chen 2013 [41]        | low risk            | <b>high risk</b>              | low risk         | moderate risk     | <b>high risk</b>                   |
| Chen 2015 [42]        | moderate risk       | low risk                      | low risk         | moderate risk     | <b>high risk</b>                   |
| Doyle 2015 [43]       | moderate risk       | moderate risk                 | low risk         | moderate risk     | <b>high risk</b>                   |
| Abdel-Hamid 2019 [44] | moderate risk       | moderate risk                 | <b>high risk</b> | moderate risk     | <b>high risk</b>                   |
| Akiyama 2016 [45]     | low risk            | moderate risk                 | <b>high risk</b> | moderate risk     | moderate risk                      |
| Alixiou 2008 [46]     | moderate risk       | low risk                      | <b>high risk</b> | <b>high risk</b>  | <b>high risk</b>                   |
| Correia 2019 [47]     | moderate risk       | low risk                      | low risk         | moderate risk     | <b>high risk</b>                   |
| Fadda 2018 [48]       | moderate risk       | low risk                      | low risk         | moderate risk     | <b>high risk</b>                   |
| Furukawa2012 [49]     | moderate risk       | low risk                      | <b>high risk</b> | moderate risk     | <b>high risk</b>                   |
| Kakutani 2019 [50]    | low risk            | <b>high risk</b>              | <b>high risk</b> | moderate risk     | <b>high risk</b>                   |



1  
2  
3  
4  
5  
6  
7  
8  
9  
10  
11  
12  
13  
14  
15  
16  
17  
18  
19  
20  
21  
22  
23  
24  
25  
26  
27  
28  
29  
30  
31  
32  
33  
34  
35  
36  
37  
38  
39  
40  
41  
42  
43  
44  
45  
46

---

|                       |                  |                  |                  |                  |                  |
|-----------------------|------------------|------------------|------------------|------------------|------------------|
| Kelly 2014 [51]       | moderate risk    | <b>high risk</b> | low risk         | moderate risk    | <b>high risk</b> |
| Liu 2019 [52]         | moderate risk    | low risk         | <b>high risk</b> | moderate risk    | <b>high risk</b> |
| Matsuo 2018 [53]      | low risk         | moderate risk    | <b>high risk</b> | moderate risk    | moderate risk    |
| Mori2012 [54]         | low risk         | low risk         | low risk         | moderate risk    | moderate risk    |
| Ortancil 2011 [55]    | moderate risk    | low risk         | <b>high risk</b> | moderate risk    | <b>high risk</b> |
| Park2016 [56]         | low risk         | low risk         | low risk         | <b>high risk</b> | <b>high risk</b> |
| Paulin 2019 [57]      | moderate risk    | <b>high risk</b> | <b>high risk</b> | moderate risk    | <b>high risk</b> |
| Restrepo 2015 [58]    | moderate risk    | low risk         | <b>high risk</b> | moderate risk    | moderate risk    |
| Rocha-Munoz 2015 [59] | moderate risk    | low risk         | <b>high risk</b> | moderate risk    | low risk         |
| Sargin 2018 [60]      | moderate risk    | <b>high risk</b> | <b>high risk</b> | moderate risk    | <b>high risk</b> |
| Sulaiman 2019 [61]    | moderate risk    | low risk         | <b>high risk</b> | <b>high risk</b> | <b>high risk</b> |
| Tian 2016 [62]        | <b>high risk</b> | low risk         | <b>high risk</b> | moderate risk    | <b>high risk</b> |
| Wang 2015 [63]        | moderate risk    | <b>high risk</b> | low risk         | <b>high risk</b> | <b>high risk</b> |
| Yang 2019 [64]        | moderate risk    | <b>high risk</b> | moderate risk    | moderate risk    | moderate risk    |
| Yin 2014 [65]         | moderate risk    | low risk         | low risk         | moderate risk    | moderate risk    |

---

---

|                 |                  |                  |                  |                  |                  |
|-----------------|------------------|------------------|------------------|------------------|------------------|
| Zhang 2018 [66] | <b>high risk</b> |
|-----------------|------------------|------------------|------------------|------------------|------------------|

---

Text in bold indicates high risk of bias

CCP, cyclic citrullinated peptide; ILD, interstitial lung disease;

For peer review only

Table 4 Assessment of quality of evidence by the Grades of Recommendation, Assessment, Development and Evaluation (GRADE) system

Outcome: rheumatoid arthritis-associated interstitial lung disease

| Prognostic factors           | Analysis     | Phase | Study limitations | Inconsistency | Indirectness | Publication bias | GRADE factors |                            |             | Overall quality |
|------------------------------|--------------|-------|-------------------|---------------|--------------|------------------|---------------|----------------------------|-------------|-----------------|
|                              |              |       |                   |               |              |                  | Imprecision   | Moderate/large effect size | Dose effect |                 |
| Anti-CCP antibody positivity | Univariate   | 1     | +                 | +             | -            | +                | -             | -                          | -           | very low        |
|                              | Multivariate | 1     | +                 | +             | -            | +                | -             | -                          | -           | very low        |
| Anti-CCP antibody titre      | Univariate   | 1     | +                 | +             | -            | +                | -             | -                          | -           | very low        |
|                              | Multivariate | 1     | +                 | -             | -            | +                | -             | -                          | +           | low             |

CCP, cyclic citrullinated peptide;

## Figure legends

### Figure 1 Study flow diagram

Out of a total of 827 records identified searching through five electronic databases, i.e., Medline, EMBASE, Science Citation Index Expanded, Cochrane Central Register of Controlled Trials and Google Scholar, 645 records were screened by titles and abstracts after removing 182 duplicates. After excluding 320 records consisting of non-English reports (n=16) and articles of ineligible types (n=304) (conference proceedings (n=153), case reports (n=72), editorials or letters (n=10) and review articles (n=69)) and 265 irrelevant reports, 60 records were retrieved as full-texts. Out of these, 31 records were excluded due to no specific pulmonary disease (n=7), no ILD (n=5), no risk estimates (n=11), no anti-CCP antibody (n=7) and no RA (n=1). The remaining 29 reports/studies were eligible for the review and additionally four reports were identified through a hand-search of references of eligible studies. Finally, a total of 33 reports/studies were selected for the review.

Figure 2 Forrest plot of the result of univariate analysis regarding the association of the positivity of anti-citrullinated peptide (CCP) antibody with rheumatoid arthritis-associated interstitial lung disease (RA-ILD)

The results of univariate analyses in 17 studies were pooled for meta-analysis. The positivity of anti-CCP antibody was significantly associated with RA-ILD with an odds ratio (OR) of 2.08 (95% confidence interval: 1.50-2.88,  $p < 0.0001$ /95% prediction interval: 0.79-5.49). There was moderate heterogeneity ( $\chi^2 = 28.6$ ,  $p = 0.03$ ,  $I^2 = 44\%$ ).

Figure 3 Forrest plot of the result of univariate analysis regarding the association of the titre of anti-citrullinated peptide (CCP) antibody with rheumatoid arthritis-associated interstitial lung disease (RA-ILD)

The results of univariate analyses in 12 studies were pooled for meta-analysis. The titre of anti-CCP antibody was significantly higher for RA-ILD than RA without ILD with a standardized mean difference (SMD) of 0.42 (95% confidence interval: 0.20-0.65,

1  
2  
3  
4  
5  
6 p=0.0002/95% prediction interval: -0.33-1.17). There was considerable heterogeneity  
7 (chi<sup>2</sup>=36.0, p=0.0002, I<sup>2</sup>=69%).  
8  
9  
10  
11  
12  
13  
14  
15  
16  
17  
18  
19  
20  
21  
22  
23  
24  
25  
26  
27  
28  
29  
30  
31  
32  
33  
34  
35  
36  
37  
38  
39  
40  
41  
42  
43  
44  
45  
46  
47  
48  
49  
50  
51  
52  
53  
54  
55  
56  
57  
58  
59  
60

For peer review only

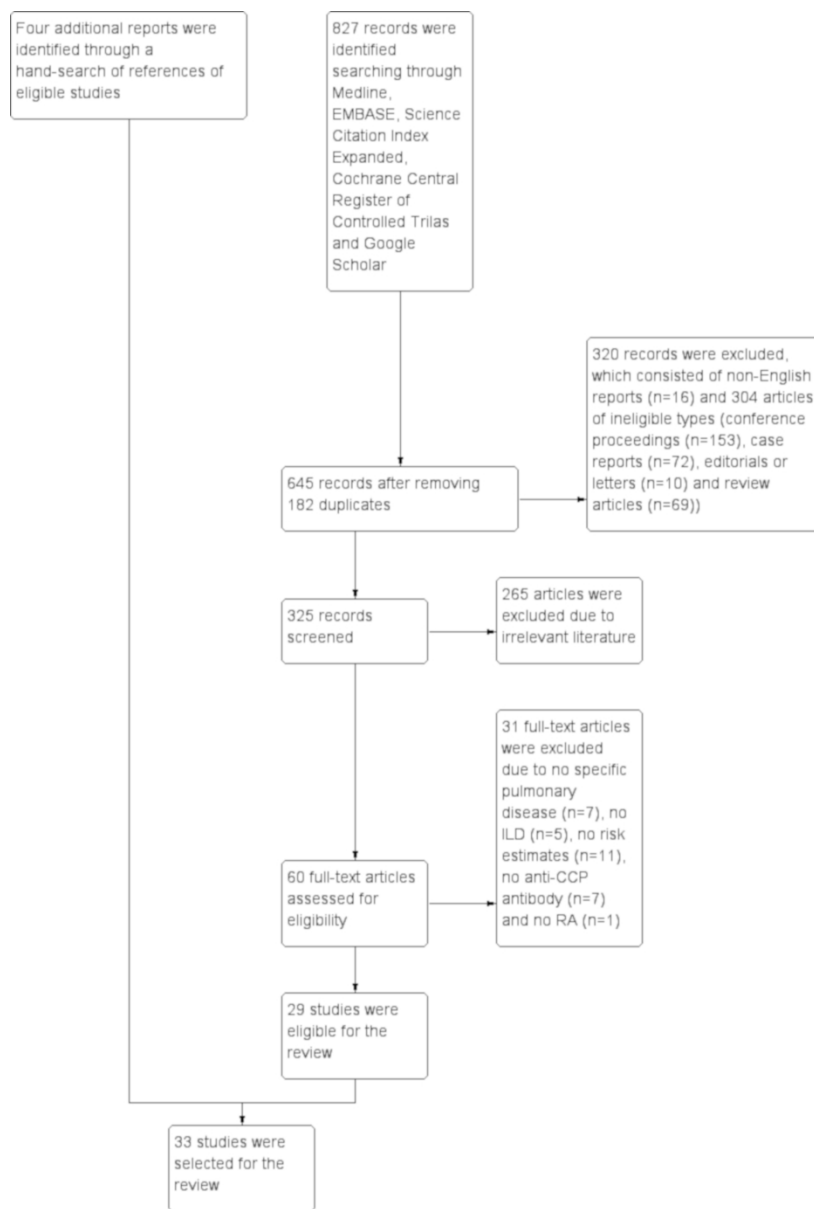

Figure 1

109x161mm (600 x 600 DPI)

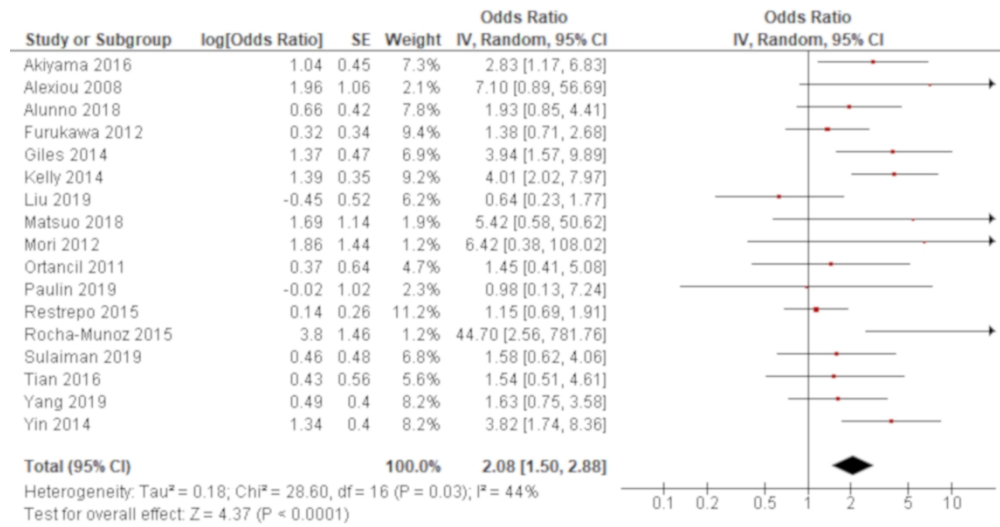

Figure 2

148x80mm (600 x 600 DPI)

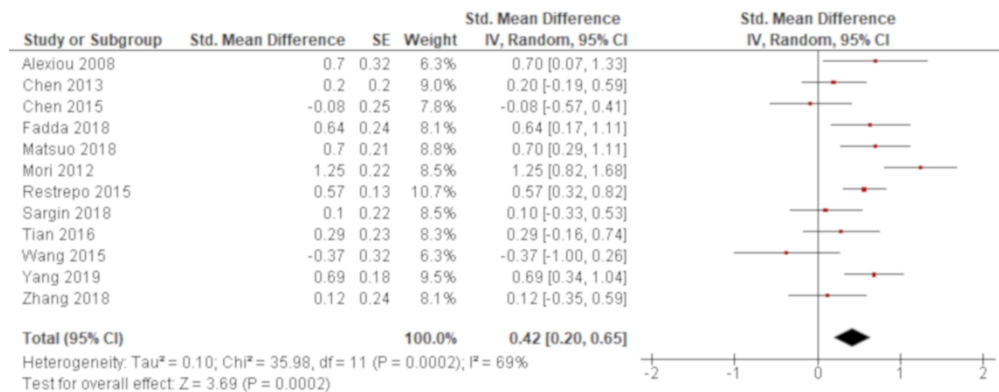

Figure 3

206x83mm (600 x 600 DPI)



## Supplementary

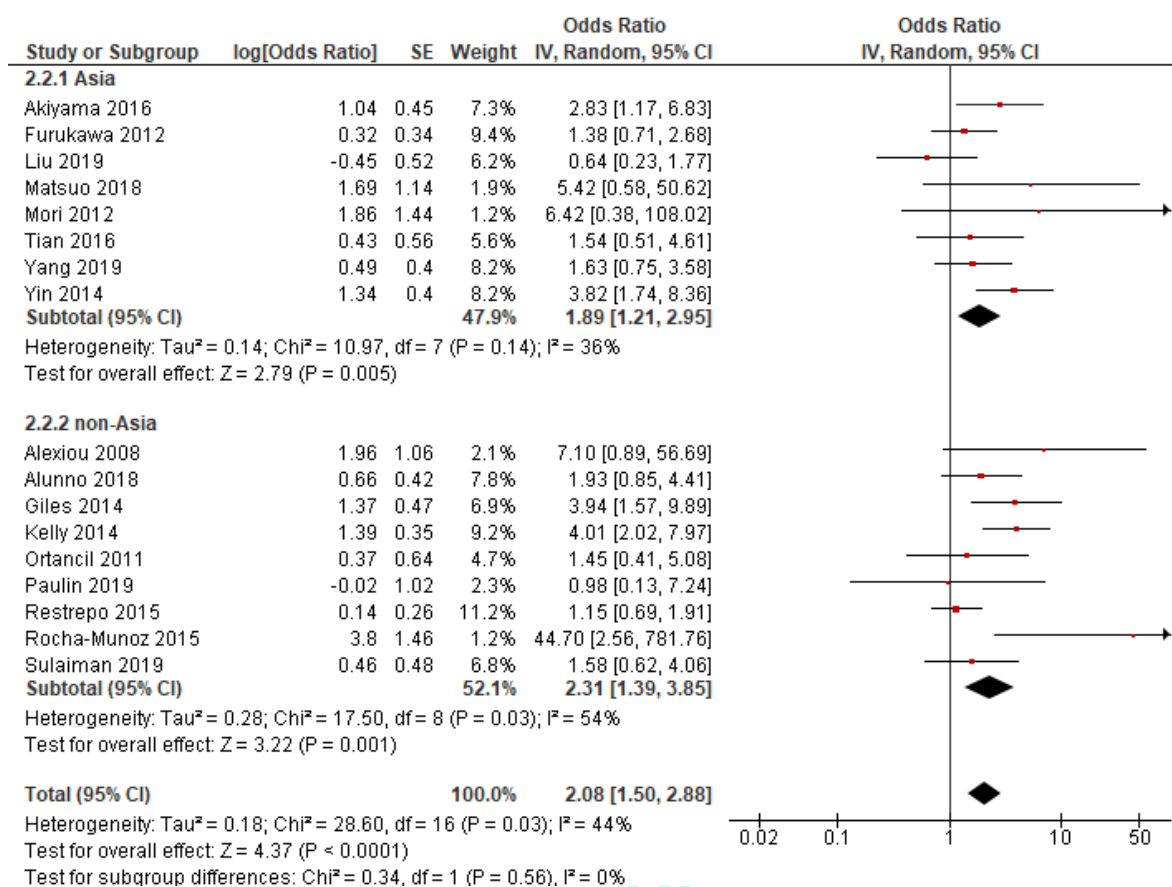

e-Figure 1 Subgroup analysis of the association of the positivity of anti-citrullinated peptide (CCP) antibody with rheumatoid arthritis-associated interstitial lung disease (RA-ILD) based on study location

A pooled analysis of studies in Asia and non-Asia individually demonstrated that the positivity of anti-CCP antibody was significantly associated with RA-ILD with odds ratios (ORs) of 1.89 (95% confidence interval (CI): 1.21-2.95, p=0.005/95% prediction interval (PI): 0.65-5.52) and 2.31 (95% CI: 1.39-3.85, p=0.001/95% PI: 0.57-9.32), respectively and there was no significant difference in these results (p=0.56). There remained considerable heterogeneity in non-Asian studies (chi<sup>2</sup>=17.5, p=0.03, I<sup>2</sup>=54%).

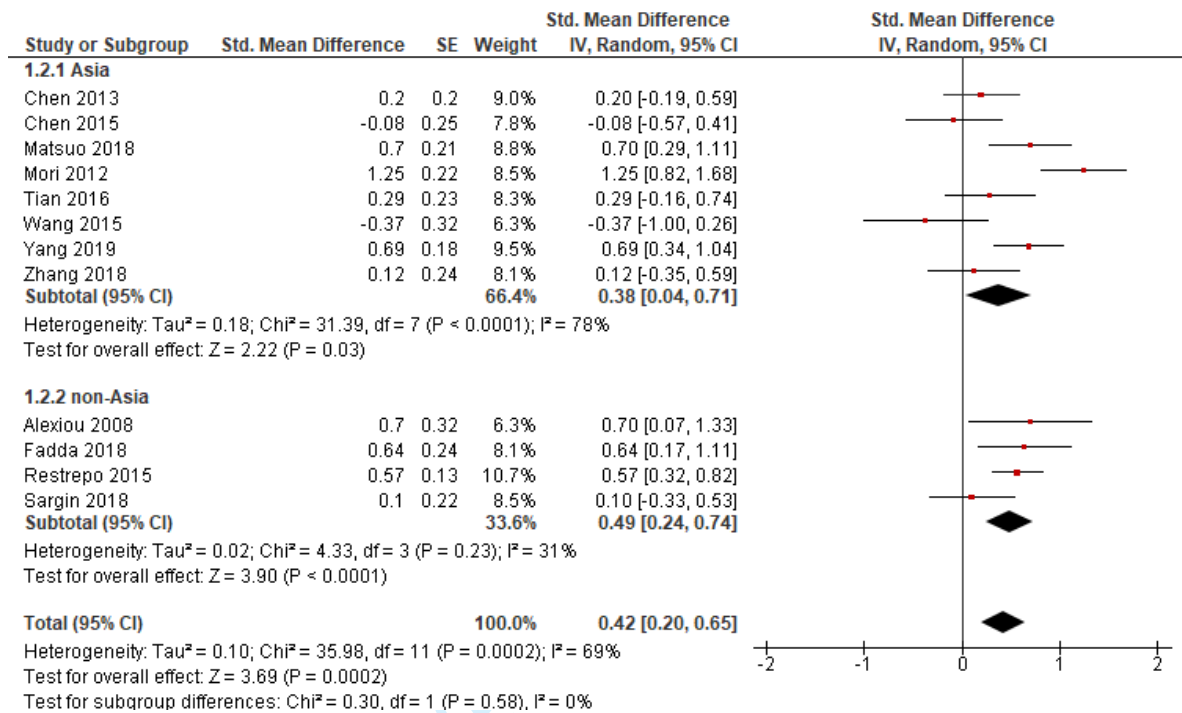

e-Figure 2 Subgroup analysis of the association of the titre of anti-citrullinated peptide (CCP) antibody with rheumatoid arthritis-associated interstitial lung disease (RA-ILD) based on study location

A pooled analysis of studies in Asia and non-Asia individually demonstrated that the titre of anti-CCP antibody was significantly higher for RA-ILD than RA without ILD with standardized mean differences (SMDs) of 0.38 (95% confidence interval (CI): 0.04-0.71, p=0.03/95% prediction interval (PI): -0.74-1.50) and 0.49 (95%CI: 0.24-0.74, p<0.0001/95%PI: -0.33-1.31), respectively and there was no significant difference in these results (p=0.58). There remained substantial heterogeneity in Asian studies (chi<sup>2</sup>=31.4, p<0.0001, I<sup>2</sup>=78%).

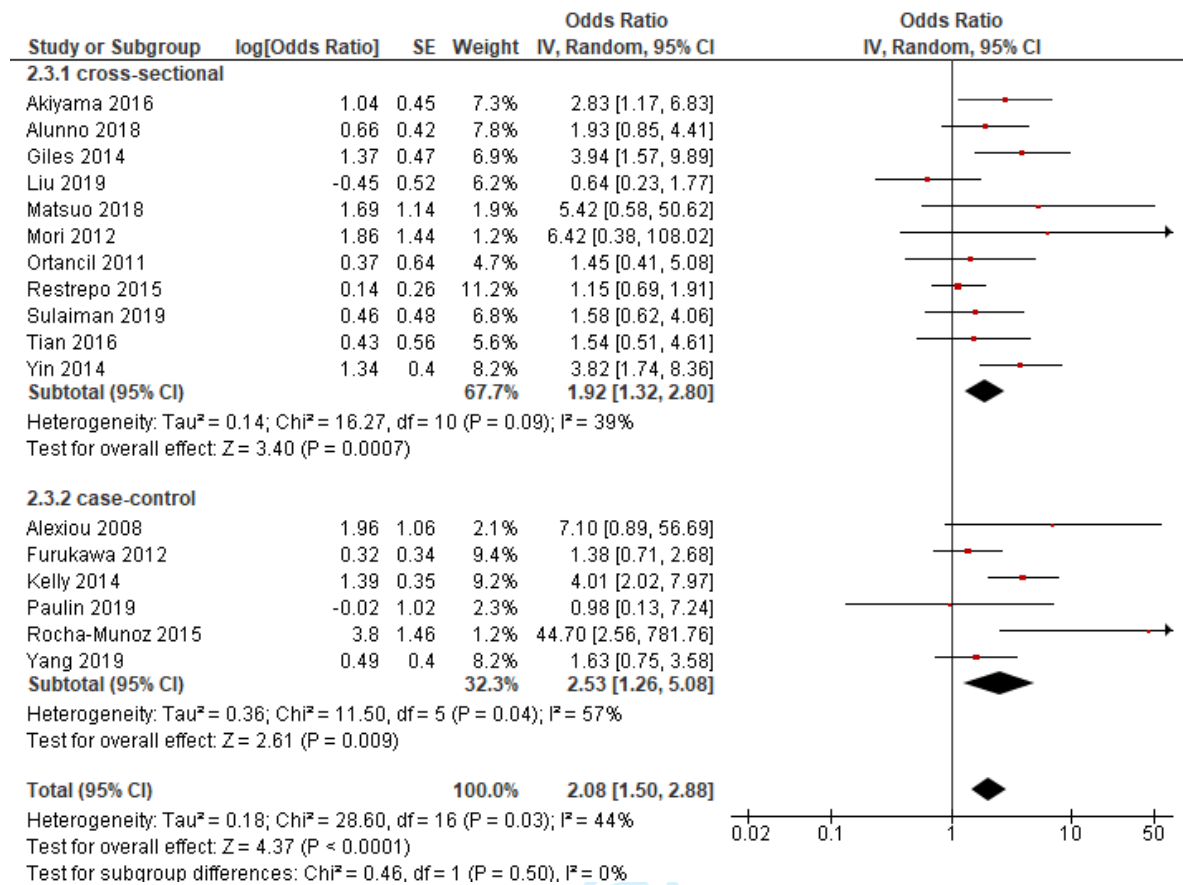

e-Figure 3 Subgroup analysis of the association of the positivity of anti-citrullinated peptide (CCP) antibody with rheumatoid arthritis-associated interstitial lung disease (RA-ILD) based on study design

A pooled analysis of cross-sectional and case-control studies individually demonstrated that the positivity of anti-CCP antibody was significantly associated with RA-ILD with odds ratios (ORs) of 1.92 (95% confidence interval (CI): 1.32-2.80,  $p=0.0007/95\%$  prediction interval (PI): 0.74-4.97) and 2.53 (95% CI: 1.26-5.08,  $p=0.009/95\%$  PI: 0.36-17.5), respectively and there was no significant difference in these results ( $p=0.50$ ). There remained considerable heterogeneity in case-control studies ( $\chi^2=11.5$ ,  $p=0.04$ ,  $I^2=57\%$ ).

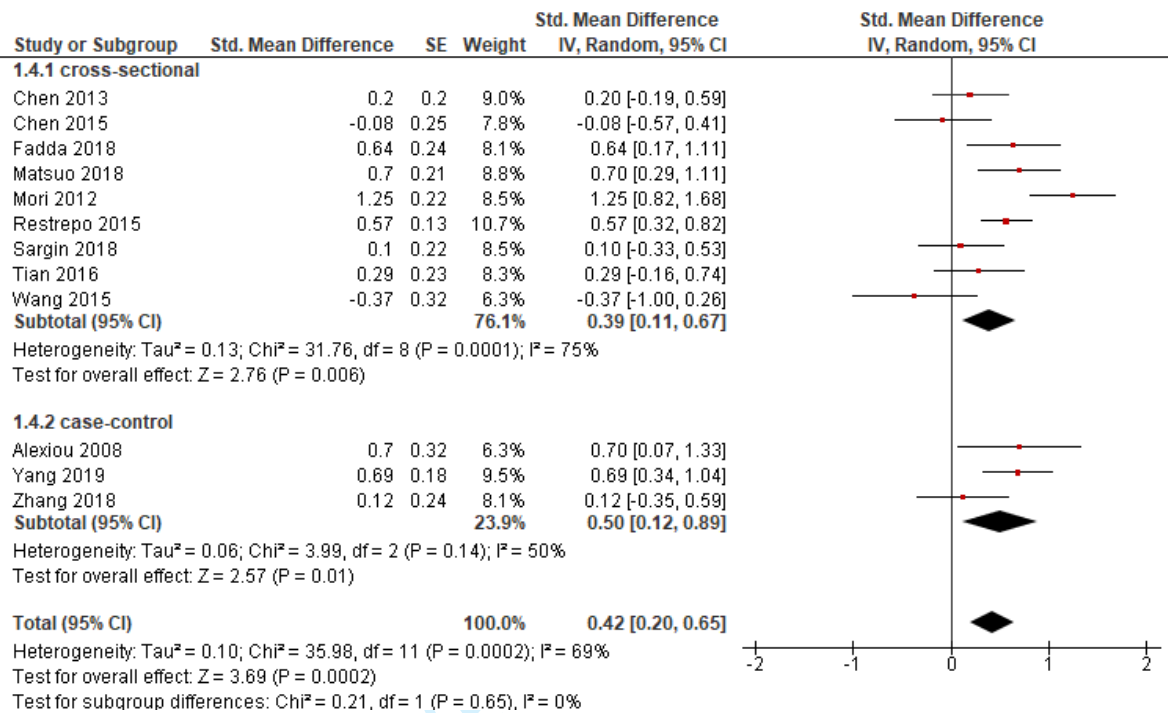

e-Figure 4 Subgroup analysis of the association of the titre of anti-citrullinated peptide (CCP) antibody with rheumatoid arthritis-associated interstitial lung disease (RA-ILD) based on study design

A pooled analysis of cross-sectional and case-control studies individually demonstrated that the titre of anti-CCP antibody was significantly higher for RA-ILD than RA without ILD with standardized mean differences (SMDs) of 0.39 (95% confidence interval (CI): 0.11-0.67, p=0.006/95% prediction interval (PI): -0.53-1.31) and 0.50 (95%CI: 0.12-0.89, p=0.01/95%PI: -3.51-4.51), respectively and there was no significant difference in these results (p=0.65). There remained substantial heterogeneity in cross-sectional studies (chi<sup>2</sup>=31.8, p=0.0001, I<sup>2</sup>=75%).

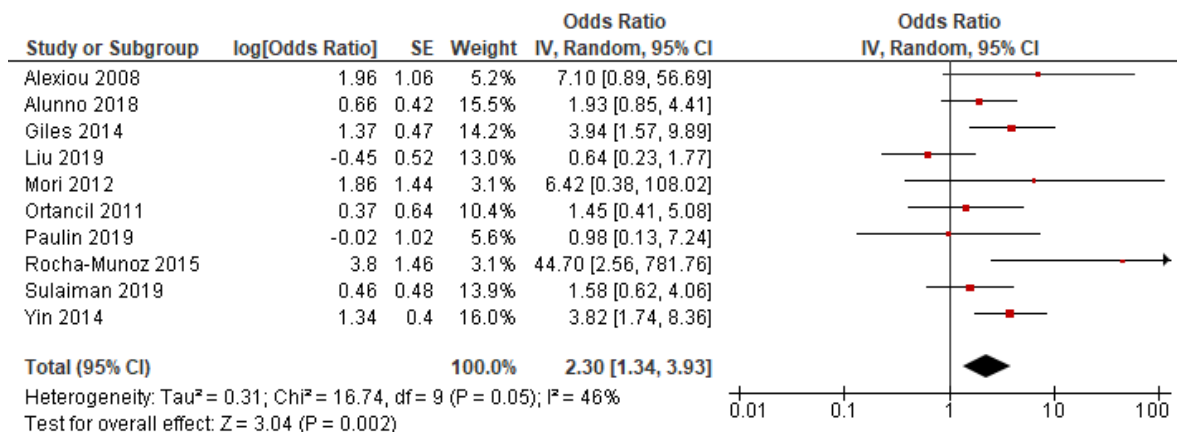

e-Figure 5 Sensitivity analysis of the association of the positivity of anti-citrullinated peptide (CCP) antibody with rheumatoid arthritis-associated interstitial lung disease (RA-ILD) focusing on the same generation of the autoantibody test

The results of univariate analyses in 10 studies that examined the second generation of anti-CCP antibody were pooled for meta-analysis. The positivity of anti-CCP antibody was significantly associated with RA-ILD with an odds ratio (OR) of 2.30 (95% confidence interval: 1.34-3.93,  $p=0.002/95\%$  prediction interval: 0.55-9.61). There remained moderate heterogeneity ( $\chi^2=16.7$ ,  $p=0.05$ ,  $I^2=46\%$ ).

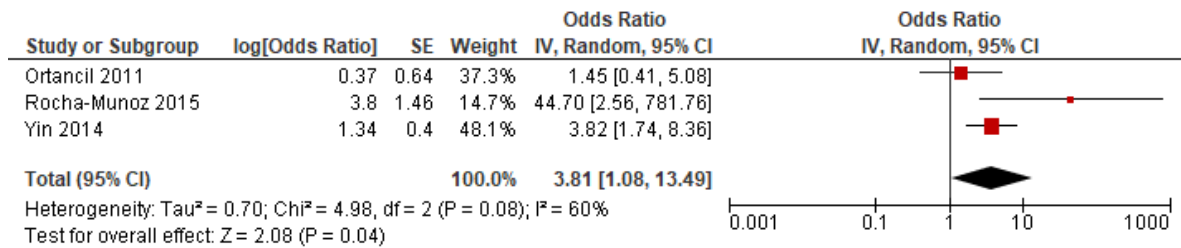

e-Figure 6 Sensitivity analysis of the association of the positivity of anti-citrullinated peptide (CCP) antibody with rheumatoid arthritis-associated interstitial lung disease (RA-ILD) focusing on the same generation of the autoantibody test by the same manufacturer

The results of univariate analyses in three studies that examined the second generation of anti-CCP antibody test by the same manufacturer (Euroimmun, Lübeck, Germany) were pooled for meta-analysis. The positivity of anti-CCP antibody was significantly associated with RA-ILD with an odds ratio (OR) of 3.81 (95% confidence interval: 1.08-13.5,  $p=0.04$ /95% prediction interval: 0.00->100.0). There remained considerable heterogeneity ( $\chi^2=4.98$ ,  $p=0.08$ ,  $I^2=60\%$ ).

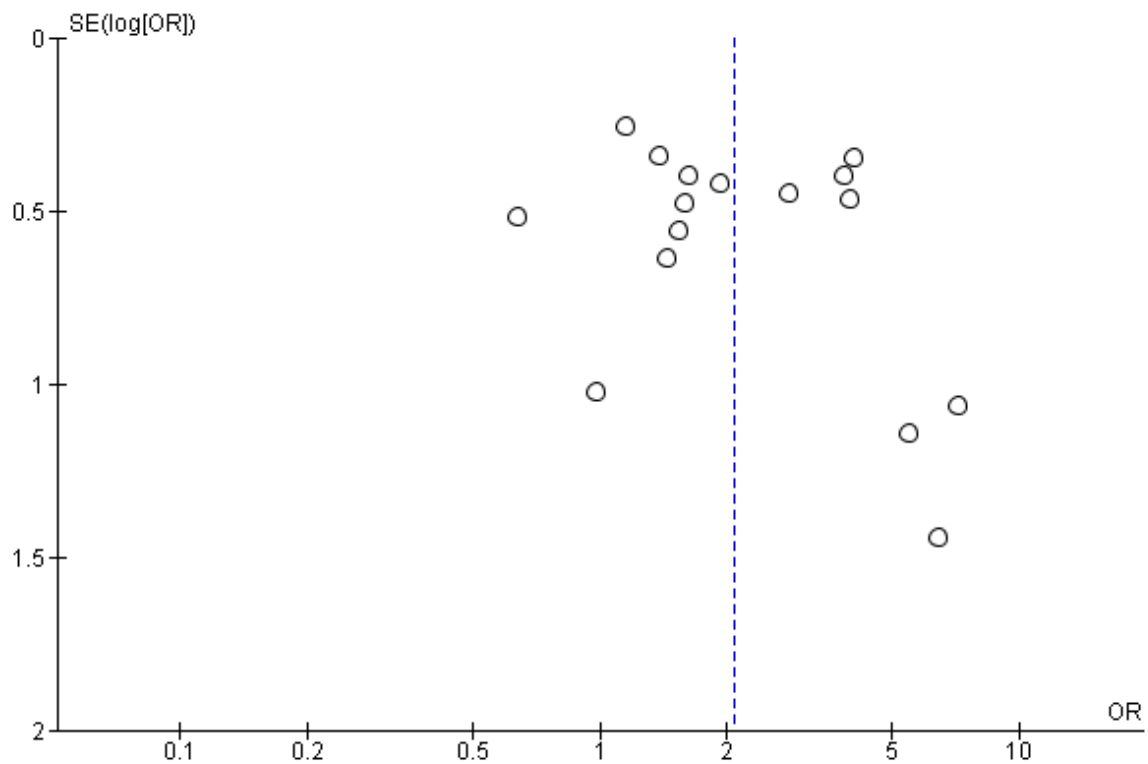

e-Figure 7 Funnel plot of the effect of the positivity of anti-citrullinated peptide (CCP) antibody against its standard error

The graphical inspection demonstrated no apparent asymmetry.

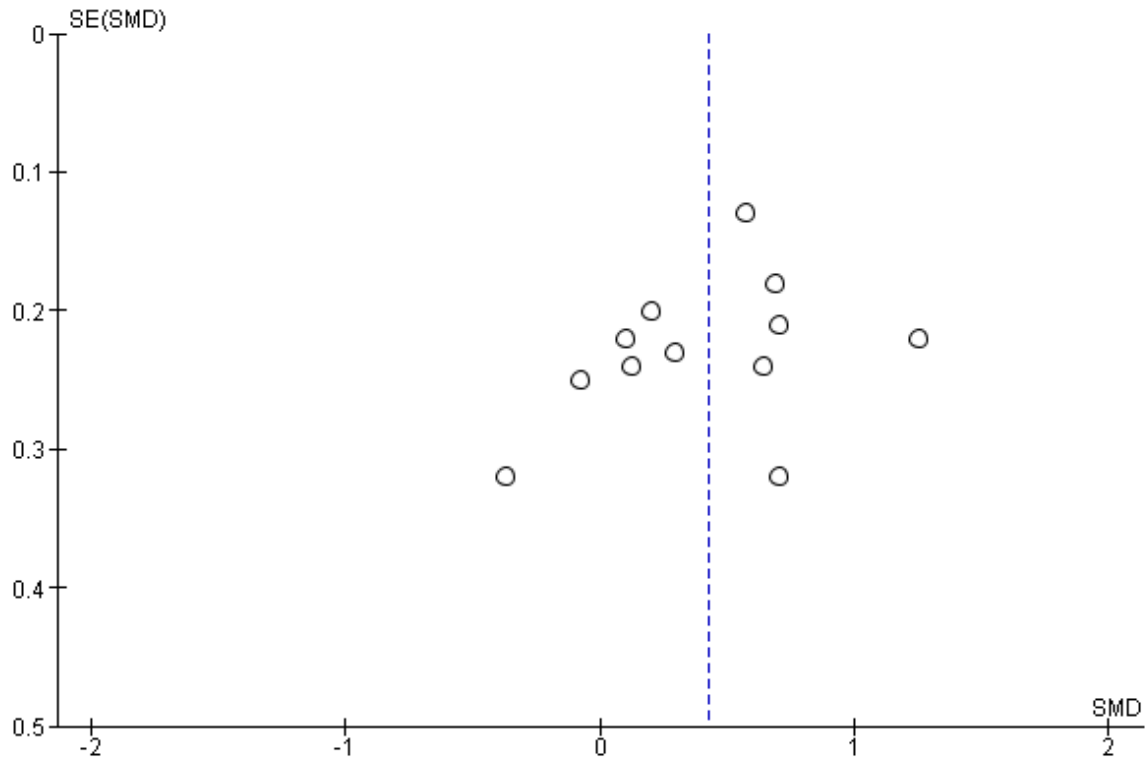

e-Figure 8 Funnel plot of the effect of the titre of anti-citrullinated peptide (CCP) antibody against its standard error

The graphical inspection demonstrated no apparent asymmetry.



## e-Appendix

## Search terms for each electronic database

## Medline (Ovid) (1946 through 12 November 2019)

- 1 exp Arthritis, Rheumatoid/ (110375)
- 2 ((rheumatoid or reumatoid or revmatoid or rheumatic or reumatic or revmatic or  
rheumat\$ or reumat\$ or revmarthrit\$) adj3 (arthrit\$ or artrit\$ or diseas\$ or condition\$ or  
nodule\$)).mp. (60240)
- 3 exp Lung Diseases, Interstitial/ (57554)
- 4 exp Pulmonary Fibrosis/ (21497)
- 5 (interstitial adj3 lung adj3 disease\$).mp. (14632)
- 6 (interstitial adj3 pneumoni\$).mp. (10671)
- 7 alveolitis.mp. (6068)
- 8 (pulmonary adj3 fibros\$).mp. (29467)
- 9 exp Anti-Citrullinated Protein Antibodies/ (211)
- 10 cyclic citrullinated protein antibod\$.mp. (28)
- 11 cyclic citrullinated peptide antibod\$.mp. (664)
- 12 citrullinated protein antibod\$.mp. (798)
- 13 citrullinated peptide antibod\$.mp. (1001)
- 14 anti-CCP.mp. (1527)
- 15 ACPA.mp. (1369)
- 16 1 or 2 (157282)
- 17 3 or 4 or 5 or 6 or 7 or 8 (88395)

- 1  
2  
3  
4  
5  
6 18 9 or 10 or 11 or 12 or 13 or 14 or 15 (3452)  
7  
8 19 16 and 17 and 18 (64)  
9  
10  
11  
12  
13  
14  
15  
16  
17  
18  
19  
20  
21  
22  
23  
24  
25  
26  
27  
28  
29  
30  
31  
32  
33  
34  
35  
36  
37  
38  
39  
40  
41  
42  
43  
44  
45  
46  
47  
48  
49  
50  
51  
52  
53  
54  
55  
56  
57  
58  
59  
60

For peer review only

EMBASE (Ovid) (1947 through 12 November 2019)

- 1 exp rheumatoid arthritis/ (218675)
- 2 ((rheumatoid or reumatoid or revmatoid or rheumatic or reumatic or revmatic or  
3 rheumat\$ or reumat\$ or revmarthrit\$) adj3 (arthrit\$or artrit\$ or diseas\$ or condition\$ or  
4 nodule\$)).mp. (106635)
- 5 exp interstitial lung disease/ (82134)
- 6 exp lung fibrosis/ (81580)
- 7 (interstitial adj3 lung adj3 disease\$.mp. (25821)
- 8 (interstitial adj3 pneumoni\$.mp. (22196)
- 9 alveolitis.mp. (29356)
- 10 (pulmonary adj3 fibros\$.mp. (32054)
- 11 exp cyclic citrullinated peptide antibody/ (6135)
- 12 cyclic citrullinated protein antibod\$.mp. (78)
- 13 cyclic citrullinated peptide antibod\$.mp. (6299)
- 14 citrullinated protein antibod\$.mp. (1603)
- 15 citrullinated peptide antibod\$.mp. (6704)
- 16 anti-CCP.mp. (4537)
- 17 ACPA.mp. (4424)
- 18 1 or 2 (285679)
- 19 3 or 4 or 5 or 6 or 7 or 8 (139209)
- 20 9 or 10 or 11 or 12 or 13 or 14 or 15 (11794)
- 21 16 and 17 and 18 (452)

1  
2  
3  
4  
5  
6 Science Citation Index Expanded (Clarivate Analytics) (1900 through 12 November  
7 2019)

8  
9  
10 #1 TS=(rheumatoid NEAR/3 arthritis or rheumatoid NEAR/3 disease\$ or rheumatoid  
11 NEAR/3 condition\$) (165,017)

12  
13  
14 #2 TS=("interstitial NEAR/3 lung NEAR/3 disease\$") OR TS=("interstitial NEAR/3  
15 pneumoni\*") OR TS=(alveolitis) OR TS=("pulmonary NEAR/3 fibros\*") (4,751)

16  
17  
18 #3 TS=(anti cyclic citrullinated protein antibod\* or anti cyclic citrullinated peptide  
19 antibod\* or anti citrullinated protein antibod\* or anti citrullinated peptide antibod\* or  
20 anti CCP or ACPA) (4,483)

21  
22  
23  
24 #3 #4 AND #5 AND #6 (2)

1  
2  
3  
4  
5  
6 Cochrane Central Register of Controlled Trials (Cochrane Library) (accessed on the 12<sup>th</sup>  
7 of November 2019)  
8

9  
10 #1 MeSH descriptor: [Arthritis, Rheumatoid] explode all trees (5530)  
11

12 #2 ((rheumatoid or reumatoid or revmatoid or rheumatic or reumatic or revmatic or  
13 rheumat\* or reumat\* or revmarthrit\*) near/3(arthrit\* or artrit\* or diseas\* or condition\*  
14 or nodule\*)):ti,ab,kw (17434)  
15  
16

17  
18 #3 MeSH descriptor: [Lung Diseases, Interstitial] explode all trees (738)  
19

20 #4 MeSH descriptor: [Pulmonary Fibrosis] explode all trees (429)  
21  
22

23 #5 interstitial near/3 lung near/3 disease\*:ti,ab,kw (1017)  
24

25 #6 interstitial near/3 pneumoni\*:ti,ab,kw (619)  
26

27 #7 alveolitis:ti,ab,kw (732)  
28

29 #8 pulmonary near/3 fibros\*:ti,ab,kw (1440)  
30  
31

32 #9 MeSH descriptor: [Anti-Citrullinated Protein Antibodies] explode all trees (6)  
33  
34

35 #10 (cyclic citrullinated protein antibod\*):ti,ab,kw (105)  
36

37 #11 (cyclic citrullinated peptide antibod\*):ti,ab,kw (178)  
38

39 #12 (citrullinated protein antibod\*):ti,ab,kw (199)  
40

41 #13 (citrullinated peptide antibod\*):ti,ab,kw (225)  
42  
43

44 #14 anti-CCP:ti,ab,kw (335)  
45

46 #15 ACPA:ti,ab,kw (292)  
47  
48

49 #16 OR #2 (17673)  
50

51 #17 #3 OR #4 OR #5 OR #6 OR #7 OR #8 (3148)  
52

53 #18 #9 OR #10 OR #11 OR #12 OR #13 OR #14 OR #15 (728)  
54  
55

56 #19 #16 AND #17 AND #18 (9)  
57  
58  
59  
60

1  
2  
3  
4  
5  
6 Google Scholar (accessed on the 12<sup>th</sup> of November 2019)  
7

8 (“rheumatoid arthritis” OR “rheumatoid disease”) (“interstitial lung disease” OR  
9 “interstitial pneumonia” OR “pulmonary fibrosis”) (“anti cyclic citrullinated protein  
10 antibody” OR “anti cyclic citrullinated peptide antibody” OR “anti citrullinated protein  
11 antibody” OR “anti citrullinated peptide antibody”)  
12  
13  
14  
15  
16  
17  
18  
19  
20  
21  
22  
23  
24  
25  
26  
27  
28  
29  
30  
31  
32  
33  
34  
35  
36  
37  
38  
39  
40  
41  
42  
43  
44  
45  
46  
47  
48  
49  
50  
51  
52  
53  
54  
55  
56  
57  
58  
59  
60

For peer review only

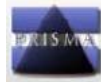

# PRISMA 2009 Checklist

| Section/topic                      | #  | Checklist item                                                                                                                                                                                                                                                                                              | Reported on page # |
|------------------------------------|----|-------------------------------------------------------------------------------------------------------------------------------------------------------------------------------------------------------------------------------------------------------------------------------------------------------------|--------------------|
| <b>TITLE</b>                       |    |                                                                                                                                                                                                                                                                                                             |                    |
| Title                              | 1  | Identify the report as a systematic review, meta-analysis, or both.                                                                                                                                                                                                                                         | Page 1             |
| <b>ABSTRACT</b>                    |    |                                                                                                                                                                                                                                                                                                             |                    |
| Structured summary                 | 2  | Provide a structured summary including, as applicable: background; objectives; data sources; study eligibility criteria, participants, and interventions; study appraisal and synthesis methods; results; limitations; conclusions and implications of key findings; systematic review registration number. | Page 3-5           |
| <b>INTRODUCTION</b>                |    |                                                                                                                                                                                                                                                                                                             |                    |
| Rationale                          | 3  | Describe the rationale for the review in the context of what is already known.                                                                                                                                                                                                                              | Page 6-7           |
| Objectives                         | 4  | Provide an explicit statement of questions being addressed with reference to participants, interventions, comparisons, outcomes, and study design (PICOS).                                                                                                                                                  | Page 7             |
| <b>METHODS</b>                     |    |                                                                                                                                                                                                                                                                                                             |                    |
| Protocol and registration          | 5  | Indicate if a review protocol exists, if and where it can be accessed (e.g., Web address), and, if available, provide registration information including registration number.                                                                                                                               | Not applicable     |
| Eligibility criteria               | 6  | Specify study characteristics (e.g., PICOS, length of follow-up) and report characteristics (e.g., years considered, language, publication status) used as criteria for eligibility, giving rationale.                                                                                                      | Page 8             |
| Information sources                | 7  | Describe all information sources (e.g., databases with dates of coverage, contact with study authors to identify additional studies) in the search and date last searched.                                                                                                                                  | Page 9             |
| Search                             | 8  | Present full electronic search strategy for at least one database, including any limits used, such that it could be repeated.                                                                                                                                                                               | Page 9-10          |
| Study selection                    | 9  | State the process for selecting studies (i.e., screening, eligibility, included in systematic review, and, if applicable, included in the meta-analysis).                                                                                                                                                   | Page 10            |
| Data collection process            | 10 | Describe method of data extraction from reports (e.g., piloted forms, independently, in duplicate) and any processes for obtaining and confirming data from investigators.                                                                                                                                  | Page 10            |
| Data items                         | 11 | List and define all variables for which data were sought (e.g., PICOS, funding sources) and any assumptions and simplifications made.                                                                                                                                                                       | Page 10-11         |
| Risk of bias in individual studies | 12 | Describe methods used for assessing risk of bias of individual studies (including specification of whether this was done at the study or outcome level), and how this information is to be used in any data synthesis.                                                                                      | Page 11            |
| Summary measures                   | 13 | State the principal summary measures (e.g., risk ratio, difference in means).                                                                                                                                                                                                                               | Page 11-12         |
| Synthesis of results               | 14 | Describe the methods of handling data and combining results of studies, if done, including measures of consistency (e.g., I <sup>2</sup> for each meta-analysis). <a href="http://bmjopen.bmj.com/site/about/guidelines.xhtml">http://bmjopen.bmj.com/site/about/guidelines.xhtml</a>                       | Page 12            |

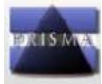

# PRISMA 2009 Checklist

Page 1 of 2

| Section/topic                 | #  | Checklist item                                                                                                                                                                                           | Reported on page # |
|-------------------------------|----|----------------------------------------------------------------------------------------------------------------------------------------------------------------------------------------------------------|--------------------|
| Risk of bias across studies   | 15 | Specify any assessment of risk of bias that may affect the cumulative evidence (e.g., publication bias, selective reporting within studies).                                                             | Page 14            |
| Additional analyses           | 16 | Describe methods of additional analyses (e.g., sensitivity or subgroup analyses, meta-regression), if done, indicating which were pre-specified.                                                         | Page 13-14         |
| <b>RESULTS</b>                |    |                                                                                                                                                                                                          |                    |
| Study selection               | 17 | Give numbers of studies screened, assessed for eligibility, and included in the review, with reasons for exclusions at each stage, ideally with a flow diagram.                                          | Page 15            |
| Study characteristics         | 18 | For each study, present characteristics for which data were extracted (e.g., study size, PICOS, follow-up period) and provide the citations.                                                             | Page 16            |
| Risk of bias within studies   | 19 | Present data on risk of bias of each study and, if available, any outcome level assessment (see item 12).                                                                                                | Page 17            |
| Results of individual studies | 20 | For all outcomes considered (benefits or harms), present, for each study: (a) simple summary data for each intervention group (b) effect estimates and confidence intervals, ideally with a forest plot. | Page 17            |
| Synthesis of results          | 21 | Present results of each meta-analysis done, including confidence intervals and measures of consistency.                                                                                                  | Page 17-18         |
| Risk of bias across studies   | 22 | Present results of any assessment of risk of bias across studies (see Item 15).                                                                                                                          | Page 18-20         |
| Additional analysis           | 23 | Give results of additional analyses, if done (e.g., sensitivity or subgroup analyses, meta-regression [see Item 16]).                                                                                    | Page 20            |
| <b>DISCUSSION</b>             |    |                                                                                                                                                                                                          |                    |
| Summary of evidence           | 24 | Summarize the main findings including the strength of evidence for each main outcome; consider their relevance to key groups (e.g., healthcare providers, users, and policy makers).                     | Page 21            |
| Limitations                   | 25 | Discuss limitations at study and outcome level (e.g., risk of bias), and at review-level (e.g., incomplete retrieval of identified research, reporting bias).                                            | Page 25            |
| Conclusions                   | 26 | Provide a general interpretation of the results in the context of other evidence, and implications for future research.                                                                                  | Page 26            |
| <b>FUNDING</b>                |    |                                                                                                                                                                                                          |                    |
| Funding                       | 27 | Describe sources of funding for the systematic review and other support (e.g., supply of data); role of funders for the systematic review.                                                               | Page 28            |

From: Moher D, Liberati A, Tetzlaff J, Altman DG, The PRISMA Group (2009). Preferred Reporting Items for Systematic Reviews and Meta-Analyses: The PRISMA Statement. PLoS Med 6(6): e1000097. doi:10.1371/journal.pmed1000097



| Checklist items for Meta-analyses of Observational Studies in Epidemiology (MOOSE)                           | Reported      |
|--------------------------------------------------------------------------------------------------------------|---------------|
|                                                                                                              | on Page       |
| Reporting of background should include                                                                       |               |
| • Problem definition                                                                                         | Page 6-7      |
| • Hypothesis statement                                                                                       | Not described |
| • Description of study outcome(s)                                                                            | Page 9        |
| • Type of exposure or intervention used                                                                      | Page 9        |
| • Type of study designs used                                                                                 | Page 9        |
| • Study population                                                                                           | Page 8        |
| Reporting of search strategy should include                                                                  |               |
| • Qualifications of searchers (eg, librarians and investigators)                                             | Not described |
| • Search strategy, including time period included in the synthesis and keywords                              | Page 9        |
| • Effort to include all available studies, including contact with authors                                    | Page 10       |
| • Databases and registries searched                                                                          | Page 9        |
| • Search software used, name and version, including special features used (eg, explosion)                    | Not described |
| • Use of hand searching (eg, reference lists of obtained articles)                                           | Page 10       |
| • List of citations located and those excluded, including justification                                      | Figure 1      |
| • Method of addressing articles published in languages other than English                                    | Page 9        |
| • Method of handling abstracts and unpublished studies                                                       | Page 9        |
| • Description of any contact with authors                                                                    | Not described |
| Reporting of methods should include                                                                          |               |
| • Description of relevance or appropriateness of studies assembled for assessing the hypothesis to be tested | Not described |
| • Rationale for the selection and coding of data (eg, sound clinical principles or convenience)              | Not described |

|                                                                                                                                                                                                                                                                                |                                  |
|--------------------------------------------------------------------------------------------------------------------------------------------------------------------------------------------------------------------------------------------------------------------------------|----------------------------------|
| • Documentation of how data were classified and coded (eg, multiple raters, blinding, and interrater reliability)                                                                                                                                                              | Not described                    |
| • Assessment of confounding (eg, comparability of cases and controls in studies where appropriate)                                                                                                                                                                             | Not described                    |
| • Assessment of study quality, including blinding of quality assessors; stratification or regression on possible predictors of study results                                                                                                                                   | Page 11                          |
| • Assessment of heterogeneity                                                                                                                                                                                                                                                  | Page 13-14                       |
| • Description of statistical methods (eg, complete description of fixed or random effects models, justification of whether the chosen models account for predictors of study results, dose-response models, or cumulative meta-analysis) in sufficient detail to be replicated | Page 11-13                       |
| • Provision of appropriate tables and graphics                                                                                                                                                                                                                                 | Figure 1<br>(study flow diagram) |
| Reporting of results should include                                                                                                                                                                                                                                            |                                  |
| • Graphic summarizing individual study estimates and overall estimate                                                                                                                                                                                                          | Figure 2-9                       |
| • Table giving descriptive information for each study included                                                                                                                                                                                                                 | Table 1, 2                       |
| • Results of sensitivity testing (eg, subgroup analysis)                                                                                                                                                                                                                       | Page 18-20                       |
| • Indication of statistical uncertainty of findings                                                                                                                                                                                                                            | Page 17-18                       |
| Reporting of discussion should include                                                                                                                                                                                                                                         |                                  |
| • Quantitative assessment of bias (eg, publication bias)                                                                                                                                                                                                                       | Page 20                          |
| • Justification of exclusion (eg, exclusion of non-English-language citations)                                                                                                                                                                                                 | Not described                    |
| • Assessment of quality of included studies                                                                                                                                                                                                                                    | Page 17                          |
| Reporting of conclusions should include                                                                                                                                                                                                                                        |                                  |
| • Consideration of alternative explanations for observed results                                                                                                                                                                                                               | Page 24-25                       |
| • Generalization of the conclusions (ie, appropriate for the data presented and within the domain of the literature review)                                                                                                                                                    | Page 21                          |
| • Guidelines for future research                                                                                                                                                                                                                                               | Page 25                          |
| • Disclosure of funding source                                                                                                                                                                                                                                                 | Page 28                          |

1  
2  
3  
4  
5  
6  
7  
8  
9  
10  
11  
12  
13  
14  
15  
16  
17  
18  
19  
20  
21  
22  
23  
24  
25  
26  
27  
28  
29  
30  
31  
32  
33  
34  
35  
36  
37  
38  
39  
40  
41  
42  
43  
44  
45  
46

From Stroup DF, Berlin JA, Morton SC, et al. Meta-analysis of observational studies in epidemiology: a proposal for reporting. Meta-analysis Of Observational Studies in Epidemiology (MOOSE) group. JAMA 2000;283:2008-12.

For peer review only

# BMJ Open

## A systematic review and meta-analysis of the risk of rheumatoid arthritis-associated interstitial lung disease related to anti-cyclic citrullinated peptide (CCP) antibody

|                                 |                                                                                                                                                              |
|---------------------------------|--------------------------------------------------------------------------------------------------------------------------------------------------------------|
| Journal:                        | <i>BMJ Open</i>                                                                                                                                              |
| Manuscript ID                   | bmjopen-2020-040465.R1                                                                                                                                       |
| Article Type:                   | Original research                                                                                                                                            |
| Date Submitted by the Author:   | 26-Nov-2020                                                                                                                                                  |
| Complete List of Authors:       | Kamiya, Hiroyuki; Tatebayashi Kosei Hospital, Department of Respiratory Medicine<br>Panlaqui, Ogee; Northern Hospital, Department of Intensive Care Medicine |
| <b>Primary Subject Heading</b>: | Respiratory medicine                                                                                                                                         |
| Secondary Subject Heading:      | Evidence based practice                                                                                                                                      |
| Keywords:                       | RHEUMATOLOGY, Thoracic medicine < INTERNAL MEDICINE, Interstitial lung disease < THORACIC MEDICINE                                                           |
|                                 |                                                                                                                                                              |

SCHOLARONE™  
Manuscripts



I, the Submitting Author has the right to grant and does grant on behalf of all authors of the Work (as defined in the below author licence), an exclusive licence and/or a non-exclusive licence for contributions from authors who are: i) UK Crown employees; ii) where BMJ has agreed a CC-BY licence shall apply, and/or iii) in accordance with the terms applicable for US Federal Government officers or employees acting as part of their official duties; on a worldwide, perpetual, irrevocable, royalty-free basis to BMJ Publishing Group Ltd ("BMJ") its licensees and where the relevant Journal is co-owned by BMJ to the co-owners of the Journal, to publish the Work in this journal and any other BMJ products and to exploit all rights, as set out in our [licence](#).

The Submitting Author accepts and understands that any supply made under these terms is made by BMJ to the Submitting Author unless you are acting as an employee on behalf of your employer or a postgraduate student of an affiliated institution which is paying any applicable article publishing charge ("APC") for Open Access articles. Where the Submitting Author wishes to make the Work available on an Open Access basis (and intends to pay the relevant APC), the terms of reuse of such Open Access shall be governed by a Creative Commons licence – details of these licences and which [Creative Commons](#) licence will apply to this Work are set out in our licence referred to above.

Other than as permitted in any relevant BMJ Author's Self Archiving Policies, I confirm this Work has not been accepted for publication elsewhere, is not being considered for publication elsewhere and does not duplicate material already published. I confirm all authors consent to publication of this Work and authorise the granting of this licence.

**Title**

A systematic review and meta-analysis of the risk of rheumatoid arthritis-associated interstitial lung disease related to anti-cyclic citrullinated peptide (CCP) antibody

**Authors**

Hiroyuki Kamiya<sup>1</sup>, Ogee Mer Panlaqui<sup>2</sup>

<sup>1</sup> Department of Respiratory Medicine, Tatebayashi Kosei Hospital, Gunma, Japan

<sup>2</sup> Department of Intensive Care Medicine, Northern Hospital, Melbourne, Australia

**Correspondence**

Hiroyuki Kamiya

Department of Respiratory Medicine, Tatebayashi Kosei Hospital, Gunma, Japan

374-8533

Phone: +81-276-72-3140

Email: mlb04194@nifty.com

**Word count**

4475

## Keywords

Rheumatoid arthritis, interstitial lung disease, anti-cyclic citrullinated peptide antibody, risk, review

## Article Summary

Strengths and limitations of this study

- This systematic review and meta-analysis addressed the risk of RA-ILD related to both the presence and titres of anti-CCP antibody, which was not clarified in previous literature.
- A substantial variance in the results of primary studies, which may have been derived from the diversity of anti-CCP antibody assays and included subjects, may undermine the generalizability of the findings of this study.
- The usefulness of the findings may be limited in clinical practice because of high probability of the autoantibody positivity for RA without ILD and no standard cut-off points for its assays.

## ABSTRACT

### Objective

To clarify the risk of rheumatoid arthritis-associated interstitial lung disease (RA-ILD) related to anti-cyclic citrullinated peptide (CCP) antibody.

### Eligibility criteria

Patients with RA with and without ILD were eligible. The primary outcome was the prevalence or incidence of ILD. Primary studies of any design aside from a case report were eligible.

### Information sources

Medline, EMBASE, Science Citation Index Expanded and Cochrane Central Register of Controlled Trials were searched from the inception through 12 November 2019.

### Data extraction and risk of bias

Two reviewers independently selected eligible reports, extracted relevant data and assessed risk of bias using a modified Quality in Prognostic Studies tool.

### Data synthesis

Meta-analysis was conducted using a random-effects model.

### Quality of evidence

The Grades of Recommendation, Assessment, Development and Evaluation system was applied.

### Results



1  
2  
3  
4  
5  
6 Among 29 out of 827 records retrieved through electronic databases and four additional  
7 reports identified from other sources, 29 studies were focused for the review. A total of  
8 10158 subjects were included and the mean age at inclusion was between 45.8 and 63.9  
9 years. The mean RA duration was between 4.3 and 14.9 years. The positivity of  
10 anti-CCP antibody ranged from 50.7% to 95.8%. All studies except for two were  
11 deemed as high risk of bias. A pooled analysis of univariate results demonstrated that  
12 the presence of anti-CCP antibody was significantly associated with RA-ILD with an  
13 OR of 2.10 (95%CI: 1.59-2.78). Similarly, the titre of anti-CCP antibody was  
14 significantly higher for RA-ILD with an SMD of 0.42 (95%CI: 0.20-0.65). These  
15 results were confirmed by multivariate analysis in the majority of studies and consistent  
16 by any subgroup and sensitivity analyses.

### 31 Conclusion

32  
33  
34 The presence and higher titres of anti-CCP antibody were suggested to be significantly  
35 associated with an increased risk of RA-ILD. However, the quality of evidence was  
36 rated as low or very low.  
37  
38  
39  
40  
41  
42  
43  
44  
45  
46  
47  
48  
49  
50  
51  
52  
53  
54  
55  
56  
57  
58  
59  
60

## Background

Rheumatoid arthritis (RA) is a systemic autoimmune disorder that is characterized by a chronic synovial inflammation and eventual joint destruction.[1] Although arthritis is the main manifestation of the disease, it also damages diverse extra-articular organs such as heart, lung, kidney, eye and skin.[2] Interstitial lung disease (ILD) is one of the most common comorbidities of RA and the prevalence of ILD for patients with RA is reported to be 10% to 40% although it varies depending on the target population, a definition of the disease and diagnostic modalities.[3] A complication of ILD deeply affects the prognosis of RA because RA-associated ILD (RA-ILD) is often progressive and only a limited therapeutic option is available.[4] It is also complicated by acute exacerbation and lung cancer.[5-6] As a result, ILD is reported to be the third leading cause of deaths of RA [7] and approximately two thirds of patients with RA-ILD eventually die within 5 years, resulting in a hazard ratio of mortality about 3.0 in comparison to RA without ILD.[8] Moreover, the most common type of ILDs among RA-ILDs, i.e., usual interstitial pneumonia (UIP),[9] demonstrates the worst prognosis, which is similar to the mortality of idiopathic pulmonary fibrosis (IPF).[10] In this context estimating the risk of developing ILD will help clinicians' decision-making and may improve the prognosis of the disease.[11] Historically, a number of studies investigated risk factors for the development of ILD and some clinical information are reported to be associated with an increased risk of RA-ILD, which include male gender,[12] smoking,[13] severe disease [14] and rheumatoid factor (RF).[15] Anti-citrullinated peptide antibody (ACPA) is a specific marker for RA and included in the latest classification criteria for an accurate diagnosis of the disease.[16] Currently,

1  
2  
3  
4  
5  
6 anti-cyclic citrullinated peptide (CCP) antibody, representing ACPAs is available  
7  
8 commercially and usually measured in clinical practice. The autoantibody is also  
9  
10 reported to be associated with an increased risk of extra-articular manifestations such as  
11  
12 ILD.[17] However, previous studies noted inconsistent results [18-19] and the former  
13  
14 systematic review seems to be limited by relatively a small number of studies and  
15  
16 unclear definition of ILD and IPF.[20] The aim of this systematic review and  
17  
18 meta-analysis was to clarify current evidence regarding the association of anti-CCP  
19  
20 antibody with RA-ILD.  
21  
22

## 23 24 **Methods**

25  
26  
27 This review was conducted and reported according to the Preferred Reporting Items for  
28  
29 Systematic Reviews and Meta-Analyses (PRISMA) [21] and the Meta-analysis of  
30  
31 Observational Studies in Epidemiology (MOOSE) statement.[22]  
32  
33

### 34 Patient and public involvement

35  
36  
37 There was no patient and public involvement in the whole process of conducting this  
38  
39 research.  
40  
41

### 42 Eligibility

43  
44  
45 Patients with RA were eligible for this review. RA was diagnosed based on its widely  
46  
47 used classification criteria, i.e., the 1987 American College of Rheumatology  
48  
49 classification criteria [23] and the 2010 American College of Rheumatology/European  
50  
51 League Against Rheumatism classification criteria.[16] ILD was characterized by  
52  
53 interstitial inflammatory and fibrotic changes in pulmonary parenchyma and diagnosed  
54  
55 based on symptomatic, functional, radiological and/or pathological findings.[24] The  
56  
57  
58  
59  
60

1  
2  
3  
4  
5  
6 pattern of ILD was classified following the international multidisciplinary classification  
7  
8 such as an official American Thoracic Society/European Respiratory Society  
9  
10 statement.[25] Other pulmonary lesions associated with RA such as bronchiolitis,  
11  
12 bronchiectasis and pleuritis were all excluded. An overlap with other connective tissue  
13  
14 diseases was included if RA was the main disease of interest in the study. There was no  
15  
16 limitation regarding demographic features of subjects, such as gender and ethnicity,  
17  
18 duration of RA and ILD and the severity of the disease unless they were less than the  
19  
20 age of 18. Subjects were allowed to participate at any point in time along their clinical  
21  
22 course of the disease.  
23  
24

25  
26  
27 Anti-CCP antibody was examined using Enzyme-Linked Immunosorbent Assay  
28  
29 (ELISA).[26] Although measurements of anti-CCP antibody were different among  
30  
31 manufacturers and each institution adopted a different test, all kinds of anti-CCP  
32  
33 antibody assays were eligible for the review. However, ACPA, which was not specified  
34  
35 as anti-CCP antibody, was excluded because it may have represented autoantibodies  
36  
37 against different citrullinated peptides.  
38  
39

40  
41 The outcome of interest in this review was the prevalence or incidence of ILD. Any  
42  
43 design of primary studies other than a case report was eligible if it described the  
44  
45 association of anti-CCP antibody with RA-ILD. Conference proceedings, letters or  
46  
47 editorials and review articles were ineligible. Only reports published in English was  
48  
49 considered.  
50  
51

## 52 53 Search strategy

54  
55  
56 The following electronic databases were searched, Medline, EMBASE, Science Citation  
57  
58 Index Expanded and Cochrane Central Register of Controlled Trials, using subject  
59  
60

1  
2  
3  
4  
5  
6 headings and text words related to study population such as ‘rheumatoid arthritis’,  
7  
8 ‘interstitial lung disease’ and ‘anti-cyclic citrullinated peptide antibodies’ (e-Appendix).  
9  
10 Search terms were constructed referring to a systematic review in a similar research area  
11  
12 identified through the Cochrane Database of Systematic Reviews (CDSR).[27]  
13  
14 Methodology filters were not used to avoid limiting the sensitivity of the search. The  
15  
16 search was covered from the inception of each database through to the 12<sup>th</sup> of  
17  
18 November 2019. The reference lists of eligible studies and relevant review articles were  
19  
20 also hand-searched to identify additional reports. Google Scholar was employed to  
21  
22 search grey literature.[28]  
23  
24  
25

#### 26 27 Study selection and data collection process

28  
29 Two reviewers (H.K. and O.M.P.) independently examined titles and abstracts of all  
30  
31 retrieved articles to select eligible reports. The same reviewers also extracted relevant  
32  
33 data based on a modified data extraction form, which was previously published in a  
34  
35 protocol paper for a systematic review.[29] Any uncertainty or disagreement between  
36  
37 reviewers arising from these processes was resolved through discussion. The following  
38  
39 data was extracted from each eligible study: first author’s name, year of publication,  
40  
41 study location, study design, sample size and its demographic features, ILD patterns if  
42  
43 available, manufacturers of anti-CCP antibody tests and their cut-off points if available,  
44  
45 a proportion of positivity and titres of anti-CCP antibodies for RA with and without  
46  
47 ILD, methods for statistical analysis, summary statistics and items associated with a risk  
48  
49 of bias.  
50  
51  
52  
53

#### 54 55 Risk of bias in individual studies

1  
2  
3  
4  
5  
6 As all studies investigated the association of anti-CCP antibody with RA-ILD as risk  
7 prediction, the Quality in Prognostic Studies (QUIPS) tool was modified and applied to  
8 assess a risk of bias in individual studies.[30] However, one of six domains that  
9 constitute the tool, i.e., ‘the attrition of study population’, was considered irrelevant and  
10 thus excluded because all studies were designed as cross-sectional or case-control  
11 studies. Each domain received an individual bias rating (low, moderate or high), with an  
12 overall risk of bias based on a total rating of all domains. For example, a study showing  
13 a low risk of bias across all domains was deemed as being subject to a low risk of bias  
14 overall.  
15  
16  
17  
18  
19  
20  
21  
22  
23  
24  
25  
26

## 27 Statistical analysis

### 28 *Summary statistics*

29  
30  
31  
32 The risk of RA-ILD associated with the presence of anti-CCP antibody was measured  
33 using either risk ratios (RRs) or odds ratios (ORs). In a case where titres of anti-CCP  
34 antibody were compared between the two comparative groups with or without ILD, the  
35 mean difference (MD) was calculated to reveal the difference of the autoantibody titres.  
36  
37 If the median was utilized instead of the mean, it was presented for each of the two  
38 groups. If the summary statistics were not provided directly, the ORs or RRs were  
39 calculated manually based on the absolute number of the outcome across the two  
40 comparative groups.  
41  
42  
43  
44  
45  
46  
47  
48  
49  
50

### 51 *Data synthesis*

52  
53  
54 The effect of an association between anti-CCP antibody and RA-ILD was statistically  
55 combined if it was presented using the same statistics in three or more studies. The  
56  
57  
58  
59  
60

1  
2  
3  
4  
5  
6 results were summarized using ORs if anti-CCP antibody was reported as binary  
7  
8 (positive/negative). If the titre of anti-CCP antibody was reported, a standardized MD  
9  
10 (calculated as Hedge's  $g$ ) was utilized to combine the results.[31] If the median, range  
11  
12 or interquartile range was described to report the autoantibody titres, they were  
13  
14 converted to the mean and standard deviation, using a formula reported by a previous  
15  
16 study, to be summarized as SMDs.[32] Only the results of univariate analysis were  
17  
18 combined whereas those of multivariate analysis were described qualitatively because  
19  
20 adjusted variables in multivariate models varied substantially between studies and  
21  
22 pooling these data could be misleading. If meta-analysis was feasible from the collated  
23  
24 data, it was conducted using a random-effects model employing the DerSimonian and  
25  
26 Laird method.[33] Meta-analysis was conducted using the statistical software package,  
27  
28 Review Manager (RevMan) Version 5.3 (Copenhagen: The Nordic Cochrane Centre,  
29  
30 The Cochrane Collaboration, 2014). Statistical significance was considered with a  
31  
32 p-value of  $<0.05$ . If combining data was deemed inappropriate due to a small number of  
33  
34 studies, the results were reported qualitatively.  
35  
36  
37  
38  
39

#### 40 *Heterogeneity between studies*

41  
42  
43 Between-study variance was assessed using both  $Q$  statistics and  $I^2$  value. For the  
44  
45 assessment of heterogeneity between studies, statistical significance was considered  
46  
47 with a p-value of  $<0.1$  due to the low power of the test. Magnitude of heterogeneity was  
48  
49 categorised as low ( $<30\%$ ), moderate ( $\geq 30\%$ ,  $<50\%$ ), considerable ( $\geq 50\%$ ,  $<70\%$ ) and  
50  
51 substantial ( $\geq 70\%$ ).[34] When heterogeneity was identified, the 95% prediction interval  
52  
53 (PI) was presented in addition to the 95% confidence interval (CI).[35] To better  
54  
55 interpret sources of heterogeneity, subgroup analysis was conducted based on study  
56  
57  
58  
59  
60

1  
2  
3  
4  
5  
6 location (Asia or non-Asia) and study design (cross-sectional or case-control).  
7

8 Sensitivity analysis was also considered focusing on the measurements of anti-CCP  
9 antibody (same manufacturer and same generation of the autoantibody assay). A  
10 meta-regression analysis was also conducted to assess the effect of other potential  
11 confounders, i.e., age, gender, smoking history, RA duration, diagnostic criteria for RA  
12 and ILD and a proportion of positivity of anti-CCP antibody. The analysis was  
13 conducted using SAS ODA (SAS Institute Inc., Cary, NC, USA).  
14  
15  
16  
17  
18  
19  
20  
21

### 22 *Meta-biases*

23  
24 Small study bias (such as publication bias) was examined graphically using a funnel  
25 plot and statistically by the Egger's test using Stata 14 (STATA Corp LLC., College  
26 Station, TX, USA) if ten or more studies were available for meta-analysis.[36]  
27  
28 Statistical significance of the test was considered with a p-value of <0.1 due to the low  
29 power of the test.  
30  
31  
32  
33  
34  
35

### 36 Confidence in cumulative evidence

37  
38 The Grades of Recommendation, Assessment, Development and Evaluation (GRADE)  
39 for prognosis [37] was applied to assess the credibility of evidence generated from this  
40 review because all studies investigated the association of anti-CCP antibody with  
41 RA-ILD as risk prediction.  
42  
43  
44  
45  
46  
47  
48  
49

## 50 **Results**

### 51 Search for eligible studies

52  
53 Out of a total of 827 records identified through a search of five electronic databases, 182  
54 duplicates were removed and 645 records were screened by titles and abstracts. After  
55  
56  
57  
58  
59  
60



1  
2  
3  
4  
5  
6 320 records consisting of non-English reports (n=16) and 304 articles of ineligible types  
7  
8 (conference proceedings (n=153), case reports (n=72), editorials or letters (n=10) and  
9  
10 review articles (n=69)) and 265 irrelevant papers were further excluded, the remaining  
11  
12 60 records were retrieved as full-texts. Out of these, 29 reports/studies were eligible for  
13  
14 the review and additionally four reports were identified through a hand-search of  
15  
16 references of eligible studies. As a result, a total of 33 reports were considered for the  
17  
18 review (Figure 1). In each of three different groups, which conducted two studies  
19  
20 sharing the same cohort, only the study with a larger sample size was included for the  
21  
22 review.[38-40] Similarly, among three studies conducted by one group, the study with  
23  
24 the largest sample size was included for the review.[41] Furthermore, another study  
25  
26 among these three studies was also included because it reported two different cohorts,  
27  
28 one of which was not overlapped by the other studies.[42] There was also a study that  
29  
30 reported two different cohorts, only one of which was included because it was not  
31  
32 overlapped by the other studies.[43] Finally, a total of 29 studies/cohorts were focused  
33  
34 for further analysis.[38-66]

#### 40 Characteristics of included studies

41  
42  
43 Study location of a total of 29 studies were distributed globally with Asia in the largest  
44  
45 number (n=15), which was followed by the Americas (n=7), Europe (n=3), Africa (n=2)  
46  
47 and others (n=2). 22 studies were cross-sectional while the remaining seven were  
48  
49 case-control studies. A complication of other CTDs was mentioned in 10 studies and  
50  
51 ILD patterns were detailed in three studies. The number of subjects enrolled in each  
52  
53 study ranged from 41 to 2702, which amounted to 10158 subjects in total and the mean  
54  
55 age at inclusion was between 45.8 and 63.9 years. The proportion of men, smoking  
56  
57  
58  
59  
60

1  
2  
3  
4  
5  
6 history and ILD ranged from 4.0% to 90.1%, 1.9% to 98.9% and 4.9% to 71.6%,  
7  
8 respectively. The mean duration of RA was between 4.3 and 14.9 years and the disease  
9  
10 activity, which was represented by the disease activity score (DAS) 28, was between 2.5  
11  
12 and 5.4 as a mean value (Table 1). Other baseline characteristics of included studies  
13  
14 were depicted in the supplementary file (e-Table 1). The generation of anti-CCP  
15  
16 antibody tests was specified in 14 studies, which consisted of the second generation in  
17  
18 12 studies and the third generation in two studies. The proportion of positivity of  
19  
20 anti-CCP antibody was reported in 21 studies, which ranged from 50.7% to 95.8%  
21  
22 while the titre of the autoantibody was described in 18 studies (Table 2).  
23  
24  
25  
26

#### 27 Risk of bias in individual studies

28  
29  
30 All studies except for two contained high risk of bias rating in at least one domain and  
31  
32 thus was deemed as high risk of bias. Among the five domains constituting the QUIPS  
33  
34 tool, the risk of bias for statistical analysis and reporting and ILD confirmation were  
35  
36 rated as high in the majority of studies due to no or insufficient information regarding  
37  
38 model building process and inconsistent diagnostic procedures. The remaining two  
39  
40 studies were rated as moderate risk of bias (Table 3).  
41  
42  
43

#### 44 Association of anti-CCP antibody with RA-ILD

##### 45 46 47 *Univariate result*

48  
49  
50 The association of positivity of anti-CCP antibody with RA-ILD was reported in 20  
51  
52 studies. Eight out of these studies demonstrated significant results with the ORs ranging  
53  
54 from 1.98 to 44.5 (Table 2). Excluding one study,[47] which conducted a stratified  
55  
56 analysis based on the level of the autoantibody titre and thus was not combined, a  
57  
58  
59  
60

1  
2  
3  
4  
5  
6 meta-analysis of 19 out of these 20 studies demonstrated that the presence of anti-CCP  
7  
8 antibody was significantly associated with RA-ILD with an OR of 2.10 (95%CI:  
9  
10 1.59-2.78) with moderate heterogeneity ( $\chi^2=29.7$ ,  $p=0.04$ ,  $I^2=39\%$ ) (Figure 2).

11  
12  
13 The titre of anti-CCP antibody was compared between RA with and without ILD in 18  
14  
15 studies. Two studies employed the same assay (INOVA Diagnostics) to examine the  
16  
17 titre of anti-CCP antibody and reported higher titres associated with RA-ILD with an  
18  
19 MD of 79.5 (95%CI: 9.72-149.3) [46] and a median value of 220 for RA-ILD vs. 120  
20  
21 for RA without ILD [48], respectively. Other two studies examined the titre of the  
22  
23 autoantibody using another assay (Euroimmun). One of them demonstrated higher titres  
24  
25 associated with RA-ILD with a median value of 77.9 for RA-ILD vs. 30.2 for RA  
26  
27 without ILD [59] and the other study reported non-significant result with an MD of  
28  
29 143.2 (95%CI: -78.1-364.5).[62] All of the other studies utilized a different or unknown  
30  
31 measurement to examine the titre of the autoantibody. Overall, 11 studies demonstrated  
32  
33 significant results with higher titres associated with RA-ILD (Table 2). Excluding six  
34  
35 studies [40, 44, 47, 51, 56, 59] where MDs were unable to be calculated, a  
36  
37 meta-analysis of 12 out of these 18 studies demonstrated that the titre of anti-CCP  
38  
39 antibody was significantly higher for RA-ILD with an SMD of 0.42 (95%CI: 0.20-0.65)  
40  
41 with considerable heterogeneity ( $\chi^2=36.0$ ,  $p=0.0002$ ,  $I^2=69\%$ ) (Figure 3).

#### 42 43 44 45 46 47 48 *Multivariate result*

49  
50 Multivariate analysis was conducted in eight studies where detailed results were  
51  
52 available in seven studies and adjusted variables were diverse between studies. Six of  
53  
54 these seven studies demonstrated a positive association between the presence or higher  
55  
56 titres of anti-CCP antibody and RA-ILD and the results were statistically significant in  
57  
58

1  
2  
3  
4  
5  
6 four studies (Table 2). One study [65] revealed the association of positivity of anti-CCP  
7 antibody with RA-ILD as an OR of 3.50 (95%CI: 1.52-8.04) (Table 2). The association  
8 of the titre of anti-CCP antibody with RA-ILD was reported by three studies as ORs of  
9 1.41 (95%CI: 1.01-1.97), 1.08 (95%CI: 1.03-1.12) and 1.06 (95%CI: 1.02-1.10).[47, 53,  
10 59, respectively]

### 11 12 13 14 15 16 17 18 *Subgroup analysis*

19  
20  
21 Subgroup analysis was conducted based on both study location and study design. There  
22 was no significant difference in the effect size of the positivity of anti-CCP antibody  
23 with ORs of 2.02 (95% CI: 1.37-2.99) by Asian reports and 2.22 (95%CI: 1.45-3.39) by  
24 non-Asian reports (p=0.75) (e-Figure 1). Similarly, there was no significant difference  
25 in the effect size of the titre of anti-CCP antibody with SMDs of 0.38 (95%CI:  
26 0.04-0.71) by Asian reports and 0.49 (95%CI: 0.24-0.74) by non-Asian reports (p=0.58)  
27 (e-Figure 2). There was no significant difference in the effect size of the positivity of  
28 anti-CCP antibody with ORs of 2.00 (95%CI: 1.48-2.71) by cross-sectional studies and  
29 2.53 (95%CI: 1.26-5.08) by case-control studies (p=0.55) (e-Figure 3). Similarly, there  
30 was no significant difference in the effect size of the titre of anti-CCP antibody with  
31 SMDs of 0.39 (95%CI: 0.11-0.67) by cross-sectional studies and 0.50 (95%CI:  
32 0.12-0.89) by case-control studies (p=0.65) (e-Figure 4).

### 33 34 35 36 37 38 39 40 41 42 43 44 45 46 47 48 *Sensitivity analysis*

49  
50  
51 Sensitivity analysis was conducted focusing on the measurements of anti-CCP antibody.  
52 A pooled analysis of 10 studies that examined the second generation of anti-CCP  
53 antibody test demonstrated that the presence of anti-CCP antibody was significantly  
54 associated with RA-ILD with an OR of 2.22 (95%CI: 1.42-3.45) (e-Figure 5). A pooled  
55  
56  
57  
58  
59  
60

1  
2  
3  
4  
5  
6 analysis of three studies that examined the second generation of anti-CCP antibody test  
7  
8 by the same manufacture (Euroimmun, Lübeck, Germany) demonstrated that the  
9  
10 presence of anti-CCP antibody was significantly associated with RA-ILD with an OR of  
11  
12 3.81 (95%CI: 1.08-13.5) (e-Figure 6).  
13  
14

15  
16 Sensitivity analysis was also conducted for the titre of anti-CCP antibody focusing on  
17  
18 the same summary statistics. A pooled analysis of seven studies where MDs were  
19  
20 available without a conversion of summary statistics demonstrated higher titres  
21  
22 associated with RA-ILD with an MD of 52.5 (95%CI: 5.76-99.2) (e-Figure 7).  
23  
24

25 All of these sensitivity analyses generated no significant difference of the results.  
26  
27

#### 28 Meta-regression analysis 29

30  
31 The effect of the presence of anti-CCP antibody on RA-ILD was not influenced by any  
32  
33 other potential confounders. Similarly, the association of the titre of anti-CCP antibody  
34  
35 with RA-ILD was not affected by any of them although gender and RA duration were  
36  
37 significant in univariate analysis (e-Table 2).  
38  
39

#### 40 Additional analysis 41

42  
43 Two funnel plots (for both positivity and titre of anti-CCP antibody) were constructed to  
44  
45 investigate small study bias, both of which demonstrated no apparent asymmetry  
46  
47 (e-Figure 8 and e-Figure 9, respectively). This graphical assessment was confirmed  
48  
49 statistically by the Egger's test, which demonstrated no statistical significance (p=0.15  
50  
51 and 0.28, respectively).  
52  
53

#### 54 Assessment of evidence level 55 56 57 58 59 60

1  
2  
3  
4  
5  
6 Study limitation was considered present in all of the evidence because no studies were  
7  
8 deemed as low risk of bias. Publication bias was also considered present in all of the  
9  
10 evidence due to the property of studies of risk prediction [37] although it was not  
11  
12 confirmed in both graphical and statistical analyses regarding univariate results. Overall,  
13  
14 the level of evidence derived from this review was rated as low or very low (Table 4).  
15  
16

## 17 **Discussion**

18  
19  
20 This study demonstrated using a pooled analysis of univariate results that the presence  
21  
22 of anti-CCP antibody was significantly associated with RA-ILD and the titre of  
23  
24 anti-CCP antibody was significantly higher for RA-ILD than RA without ILD. The  
25  
26 results were confirmed by multivariate analyses in the majority of studies that reported  
27  
28 it. These findings suggest that anti-CCP antibody is related to an increased risk of ILD  
29  
30 for patients with RA. As this review was based on a large number of studies conducted  
31  
32 globally and the results were reproduced by any subgroup and sensitivity analyses, these  
33  
34 findings will be generalizable to a broader population.  
35  
36  
37

38  
39 It is desirable and important to identify a high risk group of patients with RA who are  
40  
41 likely to develop ILD because it is often progressive and worsens the prognosis of the  
42  
43 disease.[67] If the development of ILD can be predicted, it will help clinicians'  
44  
45 decision-making and facilitate an efficient use of limited medical resources to change  
46  
47 clinical course of the disease. Much effort has been made to identify clinical  
48  
49 information such as serum biomarkers that can easily be obtained and help estimate the  
50  
51 risk of ILD for patients with RA.[68] Tests for ACPAs emerged as a tool to diagnose  
52  
53 early RA with higher specificity than traditionally employed RF.[69] They date back to  
54  
55 the discovery of anti-perinuclear factor and anti-keratin antibody in the sera of patients  
56  
57  
58  
59  
60

1  
2  
3  
4  
5  
6 with RA, which recognized the citrullinated protein filaggrin.[70] Subsequently, cyclic  
7  
8 citrullinated peptides (CCP) were synthesized to improve test performance [71] and  
9  
10 after further evolution currently the third generation of anti-CCP antibody test is  
11  
12 commercially available.[72] Anti-CCP antibody is not only helpful to diagnose RA but  
13  
14 also reported to be associated with extra-articular manifestations of the disease.[73] The  
15  
16 recent meta-analysis demonstrated an increased risk of RA-ILD as a result of serum  
17  
18 anti-CCP antibody positivity.[20] Although a number of specific citrullinated proteins  
19  
20 were discovered such as fibrinogen [74] and  $\alpha$ -enolase,[75] a diagnostic significance of  
21  
22 specific autoantibodies directed against these autoantigens has yet to be established.[76]  
23  
24  
25

26  
27 RA is classified as a systemic autoimmune disorder although the pathogenesis of the  
28  
29 disease has been under dispute for many years.[77] Recent research suggests that the  
30  
31 breakdown of immunological tolerance initially occurs in the lungs under the influence  
32  
33 of environmental stress such as exposure to cigarette smoke and genetic  
34  
35 susceptibility.[78] In short, smoking accelerates the activity of the enzyme  
36  
37 peptidylarginine deiminase that catalyses the posttranslational convert of arginine to  
38  
39 citrulline, which eventually induces autoimmune reaction and leads to the formation of  
40  
41 autoantibodies against citrullinated peptides under the interplay of both T and B  
42  
43 lymphocytes.[79] In these processes, a number of cytokines are generated and may  
44  
45 promote fibrotic changes of the lung.[80] Smoking is related to the development of ILD,  
46  
47 in particular, UIP, which is the most common type among RA-ILDs [9] and contributes  
48  
49 to the formation of ACPAs. Therefore, it is most likely that anti-CCP antibody is  
50  
51 closely associated with the development of ILD for genetically susceptible subjects with  
52  
53 smoking history and this relationship was confirmed in this report.  
54  
55  
56  
57  
58  
59  
60

1  
2  
3  
4  
5  
6 The current study is different from the previous systematic review [20] in that it  
7  
8 included a larger number of studies and subjects and thus the result is considered more  
9  
10 reliable. It also demonstrated that the titre of anti-CCP antibody was higher for RA-ILD  
11  
12 than RA without ILD. This finding is meaningful because anti-CCP antibody may be  
13  
14 positive in the majority of patients with RA regardless of the presence of ILD. Indeed,  
15  
16 the proportion of positivity of anti-CCP antibody for RA without ILD in this review  
17  
18 ranged from 49.1% to 95.8% with the median value of 71.0%. When the group of RA  
19  
20 without ILD is positive for anti-CCP antibody with high frequency, the benefit of the  
21  
22 autoantibody test for screening patients with RA at a higher risk of developing ILD will  
23  
24 be limited. Conversely, the finding of titres may be more informative because it can also  
25  
26 be employed to patients with RA without ILD who are tested positive for the  
27  
28 autoantibody. Therefore, titres of anti-CCP antibody may be more useful than just its  
29  
30 presence to estimate the risk of developing ILD. However, the interpretation of this  
31  
32 finding also needs a caution because it was derived from a comparison between  
33  
34 RA-ILD and RA without ILD and thus does not indicate any cut-off point that defines a  
35  
36 high or low titre of the autoantibody. As a result, in usual clinical practice, clinicians  
37  
38 need to assess the implication of the titre of anti-CCP antibody in the context of a total  
39  
40 evaluation. If the titre of the autoantibody is combined with clinical features such as  
41  
42 age, gender and smoking history alongside with other biomarkers such as Krebs von  
43  
44 den Lungen-6 (KL-6), creating composite scores, it would be more beneficial to identify  
45  
46 a group with a higher risk of developing ILD. However, what makes the issue more  
47  
48 complicated is the variability of measurements of anti-CCP antibody, which was  
49  
50 produced by a number of manufacturers. The sensitivity and specificity varies  
51  
52 depending on the tests and the titres are also different between assays.[81] Although an  
53  
54  
55  
56  
57  
58  
59  
60



1  
2  
3  
4  
5  
6 SMD was employed in this review to enable the comparison of titres derived from  
7  
8 different tests, the result may be difficult to be applied in clinical practice. Furthermore,  
9  
10 anti-CCP antibody is reported to be closely associated with bronchiolar disease, which  
11  
12 is also a common pulmonary complication associated with RA alongside with ILD.[54]  
13  
14 Although bronchiolar disease was excluded in this review, it is possible that the disease  
15  
16 was missed by the researcher or not selectively reported. If this was the case, the precise  
17  
18 association of anti-CCP antibody with RA-ILD will be compromised. Anti-CCP  
19  
20 antibody may also be affected by a number of other potential confounders such as age,  
21  
22 gender, smoking history, RA duration, diagnostic criteria for RA and ILD and the  
23  
24 proportion of positivity of anti-CCP antibody, which were diverse between studies.  
25  
26 Although none of these confounders were found to be significantly associated with the  
27  
28 heterogeneity of the results, it may possibly have been influenced by other clinical  
29  
30 factor such as previous treatment. Therefore, the findings of this review may not be  
31  
32 directly applicable to usual clinical practice and clinicians should consider all of the  
33  
34 factors that can affect the presence or titres of anti-CCP antibody and assess the risk of  
35  
36 ILD for patients with RA on a case-by-case basis.  
37  
38  
39  
40  
41  
42

43 There are other methodological limitations or caveats that need to be kept in mind to  
44  
45 appropriately interpret the findings of this study. First, this review specifically focused  
46  
47 on anti-CCP antibody and excluded ACPAs, which were not specified as anti-CCP  
48  
49 antibody since it may have represented autoantibodies against different citrullinated  
50  
51 peptides. However, ACPAs other than anti-CCP antibody are not usually used in  
52  
53 clinical practice and many rheumatologic teams may use the term ACPA for anti-CCP  
54  
55 antibody. Therefore, this narrow inclusion criterion may have excluded some studies  
56  
57  
58  
59  
60

1  
2  
3  
4  
5  
6 with a large number of subjects that could have reinforced the strength of meta-analysis.  
7  
8 Second, this review was only composed of cross-sectional and case-control studies and  
9  
10 thus causality between anti-CCP antibody and RA-ILD cannot be deducted although it  
11  
12 is aetiologically plausible. Third, selection bias of subjects in individual studies cannot  
13  
14 be ruled out. Patients with RA-ILD at relatively advanced stage may have been included  
15  
16 for the review. If this was the case, the findings may not be applicable to an early stage  
17  
18 of the disease and become useless for screening purpose. Fourth, anti-CCP antibody  
19  
20 may be most closely related to UIP among other types of ILD complicated with RA.  
21  
22 However, the association between anti-CCP antibody and individual ILD patterns could  
23  
24 not be elucidated in this review because most of the studies did not report them. Finally,  
25  
26 no studies were deemed as low risk of bias given that most of them were retrospectively  
27  
28 designed cross-sectional or case-control studies. Due to this study limitation, the level  
29  
30 of evidence obtained from this review was all rated as low or very low although  
31  
32 univariate results in relatively a larger number of studies were combined to generate an  
33  
34 average estimate. Therefore, more research with high quality using a prospective cohort  
35  
36 design needs to be accumulated to make a definitive conclusion or solidify the findings  
37  
38 of this review.  
39  
40  
41  
42  
43  
44

## 45 **Conclusion**

46  
47 This systematic review and meta-analysis suggested that the presence of anti-CCP  
48  
49 antibody was significantly associated with RA-ILD and the titre of the autoantibody  
50  
51 was significantly higher for RA-ILD than RA without ILD. However, an applicability  
52  
53 of these findings may be limited due to the heterogeneity of included studies.  
54  
55  
56  
57

## 58 **Ethics approval and participant consent**

1  
2  
3  
4  
5  
6 Neither ethics approval nor participant consent was required as this study was based  
7  
8 solely on the summary results of previously published articles. Individual patient data  
9  
10 were not obtained or accessed.  
11  
12

### 13 14 **Data sharing**

15  
16  
17 The dataset used and/or analysed for this review will be available from the  
18  
19 corresponding author upon a reasonable request and may become open to the public  
20  
21 through a digital repository (such as Dryad) after the final result is published in a  
22  
23 journal.  
24  
25

### 26 27 **Conflict of interest**

28  
29  
30 None to declare.  
31  
32

### 33 34 **Funding**

35  
36  
37 This research received no specific grant from any funding agency in either the public,  
38  
39 commercial, or not-for-profit sectors.  
40  
41

### 42 43 **Authors' contributions**

44  
45  
46 H.K. planned the entire research project and analysed the data. He also summarized the  
47  
48 result and wrote the manuscript. H.K. has full access to the data and takes responsibility  
49  
50 for its integrity as well as the accuracy of the analysis.  
51  
52

53  
54 O.M.P. contributed to the design of the research project and conducted the literature  
55  
56 search and data extraction. He was also involved in revising the manuscript.  
57  
58

1  
2  
3  
4  
5  
6 All researchers provided thoughts and opinions to compile a draft paper and approved  
7  
8 of the final version of the manuscript.  
9  
10  
11  
12  
13  
14  
15  
16  
17  
18  
19  
20  
21  
22  
23  
24  
25  
26  
27  
28  
29  
30  
31  
32  
33  
34  
35  
36  
37  
38  
39  
40  
41  
42  
43  
44  
45  
46  
47  
48  
49  
50  
51  
52  
53  
54  
55  
56  
57  
58  
59  
60

For peer review only

## References

1. Smolen JS, Aletaha D, McInnes IB. Rheumatoid arthritis. *Lancet* 2016;388:2023-38.
2. Turesson C. Extra-articular rheumatoid arthritis. *Curr Opin Rheumatol* 2013;25:360-6.
3. Shaw M, Collins BF, Ho LA, et al. Rheumatoid arthritis-associated lung disease. *Eur Respir Rev* 2015;24:1-16.
4. Iqbal K, Kelly C. Treatment of rheumatoid arthritis-associated interstitial lung disease: a perspective review. *Ther Adv Musculoskelet Dis* 2015;7:247-67.
5. Hozumi H, Nakamura Y, Johkoh T, et al. Acute exacerbation in rheumatoid arthritis-associated interstitial lung disease: a retrospective case control study. *BMJ Open* 2013;3:e003132.
6. Nurmi HM, Purokivi MK, Karkkainen MS, et al. Variable course of disease of rheumatoid arthritis-associated usual interstitial pneumonia compared to other subtypes. *BMC Pulm Med* 2016;16:107.
7. Turesson C, Jacobsson L, Bergstrom U. Extra-articular rheumatoid arthritis: prevalence and mortality. *Rheumatology* 1999;38:668-74.
8. Bongartz T, Nannini C, Medina-Velasquez YF, et al. Incidence and mortality of interstitial lung disease in rheumatoid arthritis: a population-based study. *Arthritis Rheum* 2010;62:1583-91.
9. Tsuchiya Y, Takayanagi N, Sugiura H, et al. Lung diseases directly associated with rheumatoid arthritis and their relationship to outcome. *Eur Respir J* 2011;37:1411-7.

10. Solomon JJ, Ryu JH, Tazelaar HD, et al. Fibrosing interstitial pneumonia predicts survival in patients with rheumatoid arthritis-associated interstitial lung disease (RA-ILD). *Respir Med* 2013;107:1247-52.
11. Paulin F, Babini A, Mamani M, et al. Practical approach to the evaluation and management of rheumatoid arthritis-interstitial lung disease based on its proven and hypothetical mechanisms. *Rev Invest Clin* 2017;69:235-42.
12. Gabbay E, Tarala R, Will R, et al. Interstitial lung disease in recent onset rheumatoid arthritis. *Am J Respir Crit Care Med* 1997;156:528-35.
13. Gochuico BR, Avila NA, Chow CK, et al. Progressive preclinical interstitial lung disease in rheumatoid arthritis. *Arch Intern Med* 2008;168:159-66.
14. Habib HM, Eisa AA, Arafat WR, et al. Pulmonary involvement in early rheumatoid arthritis patients. *Clin Rheumatol* 2011;30:217-21.
15. Zhang Y, Li H, Wu N, et al. Retrospective study of the clinical characteristics and risk factors of rheumatoid arthritis-associated interstitial lung disease. *Clin Rheumatol* 2017;36:817-23.
16. Aletaha D, Neogi T, Silman AJ, et al. 2010 Rheumatoid arthritis classification criteria: an American College of Rheumatology/European League Against Rheumatism collaborative initiative. *Arthritis Rheum* 2010;62:2569-81.
17. Aubart F, Crestani B, Nicaise-Roland P, et al. High levels of anti-cyclic citrullinated peptide autoantibodies are associated with co-occurrence of pulmonary diseases with rheumatoid arthritis. *J Rheumatol* 2011;38:979-82.
18. Inui N, Enomoto N, Suda T, et al. Anti-cyclic citrullinated peptide antibodies in lung diseases associated with rheumatoid arthritis. *Clin Biochem* 2008;41:1074-7.

- 1  
2  
3  
4  
5  
6 19. Jearn LH, Kim TY. Level of anticitrullinated peptide/protein antibody is not  
7 associated with lung diseases in rheumatoid arthritis. *J Rheumatol* 2012;39:1493-4.  
8  
9  
10 20. Zhu J, Zhou Y, Chen X, et al. A metaanalysis of the increased risk of  
11 rheumatoid arthritis-related pulmonary disease as a result of serum anticitrullinated  
12 protein antibody positivity. *J Rheumatol* 2014;41:1282-9.  
13  
14  
15 21. Moher D, Liberati A, Tetzlaff J, et al. Preferred reporting items for systematic  
16 reviews and meta-analyses: the PRISMA statement. *Ann Intern Med* 2009;151:264-9.  
17  
18  
19 22. Stroup DF, Berlin JA, Morton SC, et al. Meta-analysis of observational studies  
20 in epidemiology: a proposal for reporting. Meta-analysis of observational studies in  
21 epidemiology (MOOSE) group. *JAMA* 2000;283:2008-12.  
22  
23  
24 23. Arnett FC, Edworthy SM, Bloch DA, et al. The American Rheumatism  
25 Association 1987 revised criteria for the classification of rheumatoid arthritis. *Arthritis*  
26 *Rheum* 1988;31:315-24.  
27  
28  
29 24. American Thoracic Society. American Thoracic Society/European Respiratory  
30 Society international multidisciplinary consensus classification of the idiopathic  
31 interstitial pneumonias. *Am J Respir Crit Care Med* 2002;165:277-304.  
32  
33  
34 25. Travis WD, Costabel U, Hansell DM, et al. An official American Thoracic  
35 Society/European Respiratory Society statement: update of the international  
36 multidisciplinary classification of the idiopathic interstitial pneumonias. *Am J Respir*  
37 *Crit Care Med* 2013;188:733-48.  
38  
39  
40 26. Suzuki K, Sawada T, Murakami A, et al. High diagnostic performance of  
41 ELISA detection of antibodies to citrullinated antigens in rheumatoid arthritis. *Scand J*  
42 *Rheumatol* 2003;32:197-204.  
43  
44  
45  
46  
47  
48  
49  
50  
51  
52  
53  
54  
55  
56  
57  
58  
59  
60

- 1  
2  
3  
4  
5  
6 27. Lopez-Olivo MA, Siddhanamatha HR, Shea B, et al. Methotrexate for treating  
7  
8  
9  
10  
11 28. Haddaway NR, Collins AM, Coughlin D, et al. The role of google scholar in  
12  
13  
14  
15  
16  
17 29. Kamiya H, Panlaqui OM. Prognostic significance of autoantibodies for  
18  
19  
20  
21  
22  
23  
24 30. Hayden JA, Cote P, Bombardier C. Evaluation of the quality of prognosis  
25  
26  
27  
28  
29 31. Hedges LV. Distribution theory for Glass's estimator of effect size and related  
30  
31  
32  
33  
34  
35  
36  
37  
38  
39  
40 33. DerSimonian R, Laird N. Meta-analysis in clinical trials. *Control Clin Trials*  
41  
42  
43  
44  
45 34. Higgins JPT, Green S, eds. Cochrane Handbook for Systematic Reviews of  
46  
47  
48  
49  
50  
51 35. Riley RD, Higgins JP, Deeks JJ. Interpretation of random effects  
52  
53  
54  
55  
56 36. Egger M, Davey Smith G, Schneider M, et al. Bias in meta-analysis detected  
57  
58  
59  
60



- 1  
2  
3  
4  
5  
6 37. Huguet A, Hayden JA, Stinson J, et al. Judging the quality of evidence in  
7 reviews of prognostic factor research: adapting the GRADE framework. *Syst Rev*  
8 2013;2:71.  
9  
10  
11  
12 38. Alunno A, Bistoni O, Pratesi F, et al. Anti-citrullinated alpha enolase  
13 antibodies, interstitial lung disease and bone erosion in rheumatoid arthritis.  
14 *Rheumatology* 2018;57:850-5.  
15  
16  
17 39. England BR, Duryee MJ, Roul P, et al. Malondialdehyde-acetaldehyde adducts  
18 and antibody responses in rheumatoid arthritis-interstitial lung disease. *Arthritis*  
19 *Rheumatol* 2019;71:1483-93.  
20  
21  
22 40. Giles JT, Danoff SK, Sokolove J, et al. Association of fine specificity and  
23 repertoire expansion of anticitrullinated peptide antibodies with rheumatoid arthritis  
24 associated interstitial lung disease. *Ann Rheum Dis* 2014;73:1487-94.  
25  
26  
27 41. Chen J, Shi Y, Wang X, et al. Asymptomatic preclinical rheumatoid  
28 arthritis-associated interstitial lung disease. *Clin Dev Immunol* 2013;2013:406927.  
29  
30  
31 42. Chen J, Doyle TJ, Liu Y, et al. Biomarkers of rheumatoid arthritis-associated  
32 interstitial lung disease. *Arthritis Rheumatol* 2015;67:28-38.  
33  
34  
35 43. Doyle TJ, Patel AS, Hatabu H, et al. Detection of rheumatoid  
36 arthritis-interstitial lung disease is enhanced by serum biomarkers. *Am J Respir Crit*  
37 *Care Med* 2015;191:1403-12.  
38  
39  
40 44. Abdel-Mageed SA-H, Foda EE, Abdel-Azeez EM, et al. Increased risk of  
41 rheumatoid arthritis-related pulmonary disease as a results of serum anticitrullinated  
42 protein antibody positivity. *Egypt J Hosp Med* 2019;76:3572-80.  
43  
44  
45 45. Akiyama M, Kaneko Y, Yamaoka K, et al. Association of disease activity with  
46 acute exacerbation of interstitial lung disease during tocilizumab treatment in patients  
47  
48  
49  
50  
51  
52  
53  
54  
55  
56  
57  
58  
59  
60

with rheumatoid arthritis: a retrospective, case-control study. *Rheumatol Int*

2016;36:881-9.

46. Alexiou I, Germenis A, Koutroumpas A, et al. Anti-cyclic citrullinated peptide-2 (CCP2) autoantibodies and extra-articular manifestations in Greek patients with rheumatoid arthritis. *Clin Rheumatol* 2008;27:511-3.

47. Correia CS, Briones MR, Guo R, et al. Elevated anti-cyclic citrullinated peptide antibody titer is associated with increased risk for interstitial lung disease. *Clin Rheumatol* 2019;38:1201-6.

48. Fadda S, Khairy N, Fayed H, et al. Interstitial lung disease in Egyptian patients with rheumatoid arthritis: frequency, pattern and correlation with clinical manifestations and anti-citrullinated peptide antibodies level. *Egypt Rheumatol* 2018;40:155-60.

49. Furukawa H, Oka S, Shimada K, et al. Association of human leukocyte antigen with interstitial lung disease in rheumatoid arthritis: a protective role for shared epitope. *PLoS One* 2012;7:e33133.

50. Kakutani T, Hashimoto A, Tominaga A, et al. Related factors, increased mortality and causes of death in patients with rheumatoid arthritis-associated interstitial lung disease. *Mod Rheumatol* 2019:1-19.

51. Kelly CA, Saravanan V, Nisar M, et al. Rheumatoid arthritis-related interstitial lung disease: associations, prognostic factors and physiological and radiological characteristics-a large multicentre UK study. *Rheumatology* 2014;53:1676-82.

52. Liu Y, Liu C, Li L, et al. High levels of antibodies to citrullinated alpha-enolase peptide-1 (CEP-1) identify erosions and interstitial lung disease (ILD) in a Chinese rheumatoid arthritis cohort. *Clinical Immunology* 2019;200:10-5.

- 1  
2  
3  
4  
5  
6 53. Matsuo T, Hashimoto M, Ito I, et al. Interleukin-18 is associated with the  
7 presence of interstitial lung disease in rheumatoid arthritis: a cross-sectional study.  
8  
9 *Scand J Rheumatol* 2019;48:87-94.
- 10  
11  
12 54. Mori S, Koga Y, Sugimoto M, et al. Different risk factors between interstitial  
13 lung disease and airway disease in rheumatoid arthritis. *Respir Med* 2012;106:1591-9.  
14  
15  
16 55. Ortancil O, Bulmus N, Ozdolap S, et al. Anti-cyclic citrullinated peptide  
17 antibodies in rheumatoid arthritis and their relationship with extra-articular  
18 manifestations. *Turk J Rheumatol* 2011;26:193-8.  
19  
20  
21  
22  
23 56. Park WH, Kim SS, Shim SC, et al. Visual Assessment of chest computed  
24 tomography findings in anti-cyclic citrullinated peptide antibody positive rheumatoid  
25 arthritis: is it associated with airway abnormalities? *Lung* 2016;194:97-105.  
26  
27  
28  
29  
30 57. Paulin F, Doyle TJ, Mercado JF, et al. Development of a risk indicator score  
31 for the identification of interstitial lung disease in patients with rheumatoid arthritis.  
32  
33 *Reumatol Clin* 2019;S1699-258X: 30111-1.  
34  
35  
36 58. Restrepo JF, del Rincon I, Battafarano DF, et al. Clinical and laboratory factors  
37 associated with interstitial lung disease in rheumatoid arthritis. *Clin Rheumatol*  
38 2015;34:1529-36.  
39  
40  
41  
42  
43 59. Rocha-Munoz AD, Ponce-Guarneros M, Gamez-Nava JI, et al. Anti-cyclic  
44 citrullinated peptide antibodies and severity of interstitial lung disease in women with  
45 rheumatoid arthritis. *J Immunol Res* 2015;2015:151626.  
46  
47  
48  
49  
50 60. Sargin G, Kose R, Senturk T. Tumor-associated antigens in rheumatoid  
51 arthritis interstitial lung disease or malignancy? *Arch Rheumatol* 2018;33:431-7.  
52  
53  
54  
55  
56  
57  
58  
59  
60

- 1  
2  
3  
4  
5  
6 61. Sulaiman FN, Wong KK, Ahmad WAW, et al. Anti-cyclic citrullinated peptide  
7 antibody is highly associated with rheumatoid factor and radiological defects in  
8 rheumatoid arthritis patients. *Medicine* 2019;98:e14945.  
9  
10  
11  
12 62. Tian F, Li J, Tuo H, et al. The anti-mutated citrullinated vimentin antibody as a  
13 potential predictor for rheumatoid arthritis associated interstitial lung diseases. *Int J*  
14 *Clin Exp Med* 2016;9:6813-8.  
15  
16  
17 63. Wang T, Zheng XJ, Liang BM, et al. Clinical features of rheumatoid  
18 arthritis-associated interstitial lung disease. *Sci Rep* 2015;5:14897.  
19  
20  
21 64. Yang JA, Lee JS, Park JK, et al. Clinical characteristics associated with  
22 occurrence and poor prognosis of interstitial lung disease in rheumatoid arthritis.  
23 *Korean J Intern Med* 2019;34:434-41.  
24  
25  
26 65. Yin Y, Liang D, Zhao L, et al. Anti-cyclic citrullinated peptide antibody is  
27 associated with interstitial lung disease in patients with rheumatoid arthritis. *PLoS One*  
28 2014;9:e92449.  
29  
30  
31 66. Zhang J, Li J, Yu X, et al. Changes and clinical significance of serum tumor  
32 markers in patients with rheumatoid arthritis combined with interstitial lung disease. *J*  
33 *Hainan Med Univ* 2018;24:46-9.  
34  
35  
36 67. Kim EJ, Elicker BM, Maldonado F, et al. Usual interstitial pneumonia in  
37 rheumatoid arthritis-associated interstitial lung disease. *Eur Respir J* 2010;35:1322-8.  
38  
39  
40 68. Trouw LA, Mahler M. Closing the serological gap: promising novel  
41 biomarkers for the early diagnosis of rheumatoid arthritis. *Autoimmun Rev*  
42 2012;12:318-22.  
43  
44  
45  
46  
47  
48  
49  
50  
51  
52  
53  
54  
55  
56  
57  
58  
59  
60

- 1  
2  
3  
4  
5  
6 69. Taylor P, Gartemann J, Hsieh J, et al. A systematic review of serum biomarkers  
7 anti-cyclic citrullinated peptide and rheumatoid factor as tests for rheumatoid arthritis.  
8  
9  
10 *Autoimmune Dis* 2011;2011:815038.  
11  
12 70. Girbal-Neuhauser E, Durieux JJ, Arnaud M, et al. The epitopes targeted by the  
13 rheumatoid arthritis-associated antifilaggrin autoantibodies are posttranslationally  
14 generated on various sites of (pro)filaggrin by deimination of arginine residues. *J*  
15  
16  
17  
18  
19  
20  
21 *Immunol* 1999;162:585-94.  
22 71. Schellekens GA, Visser H, de Jong BA, et al. The diagnostic properties of  
23 rheumatoid arthritis antibodies recognizing a cyclic citrullinated peptide. *Arthritis*  
24  
25  
26  
27  
28  
29  
30  
31  
32  
33  
34  
35  
36  
37  
38  
39  
40  
41  
42  
43  
44  
45  
46  
47  
48  
49  
50  
51  
52  
53  
54  
55  
56  
57  
58  
59  
60
71. Schellekens GA, Visser H, de Jong BA, et al. The diagnostic properties of rheumatoid arthritis antibodies recognizing a cyclic citrullinated peptide. *Arthritis Rheum* 2000;43:155-63.
72. Swart A, Burlingame RW, Gurtler I, et al. Third generation anti-citrullinated peptide antibody assay is a sensitive marker in rheumatoid factor negative rheumatoid arthritis. *Clin Chim Acta* 2012;414:266-72.
73. Turesson C, Jacobsson LT, Sturfelt G, et al. Rheumatoid factor and antibodies to cyclic citrullinated peptides are associated with severe extra-articular manifestations in rheumatoid arthritis. *Ann Rheum Dis* 2007;66:59-64.
74. Sebbag M, Moinard N, Auger I, et al. Epitopes of human fibrin recognized by the rheumatoid arthritis-specific autoantibodies to citrullinated proteins. *Eur J Immunol* 2006;36:2250-63.
75. Mahdi H, Fisher BA, Kallberg H, et al. Specific interaction between genotype, smoking and autoimmunity to citrullinated alpha-enolase in the etiology of rheumatoid arthritis. *Nat Genet* 2009;41:1319-24.
76. Boman A, Brink M, Lundquist A, et al. Antibodies against citrullinated peptides are associated with clinical and radiological outcomes in patients with early

1  
2  
3  
4  
5  
6 rheumatoid arthritis: a prospective longitudinal inception cohort study. *RMD Open*  
7  
8 2019;5:e000946.

9  
10 77. Scott DL, Wolfe F, Huizinga TW. Rheumatoid arthritis. *Lancet*  
11  
12 2010;376:1094-108.

13  
14 78. Perry E, Kelly C, Eggleton P, et al. The lung in ACPA-positive rheumatoid  
15  
16 arthritis: an initiating site of injury? *Rheumatology* 2014;53:1940-50.

17  
18 79. Cavagna L, Monti S, Grosso V, et al. The multifaceted aspects of interstitial  
19  
20 lung disease in rheumatoid arthritis. *Biomed Res Int* 2013;2013:759760.

21  
22 80. Brito Y, Glassberg MK, Ascherman DP. Rheumatoid arthritis-associated  
23  
24 interstitial lung disease: current concepts. *Curr Rheumatol Rep* 2017;19:79.

25  
26 81. Van Hoovels L, Jacobs J, Vander Cruyssen B, et al. Performance  
27  
28 characteristics of rheumatoid factor and anti-cyclic citrullinated peptide antibody assays  
29  
30 may impact ACR/EULAR classification of rheumatoid arthritis. *Ann Rheum Dis*  
31  
32 2018;77:667-77.  
33  
34  
35  
36  
37  
38  
39  
40  
41  
42  
43  
44  
45  
46  
47  
48  
49  
50  
51  
52  
53  
54  
55  
56  
57  
58  
59  
60

Table 1 Baseline characteristics of included studies<sup>a</sup>

| Study             | Location | Design                       | Number (n) | Age at inclusion (years) | Gender (male) (n (%)) | Smoking (n (%)) | Proportion of ILD (n (%)) <sup>b</sup> | Disease duration (RA) (years)      | Disease activity <sup>c</sup>    | Other CTDs (n) | ILD patterns (on HRCT) (n) |
|-------------------|----------|------------------------------|------------|--------------------------|-----------------------|-----------------|----------------------------------------|------------------------------------|----------------------------------|----------------|----------------------------|
| Alunno 2018 [38]  | Italy    | Cross-sectional              | 252        | 61.7±0.8                 | 56 (22.2)             | -               | 37 (20.2) (n=183)                      | 12.6±0.6                           | -                                | -              | -                          |
| England 2019 [39] | US       | Cross-sectional <sup>d</sup> | 1823       | 63.5±11.0                | (90.1)                | (89.5)          | 90 (4.9)                               | 11.1±11.5                          | 4.0±1.6                          | -              | -                          |
| Giles 2014 [40]   | US       | Cross-sectional <sup>d</sup> | 177        | 59±8 <sup>e</sup>        | 71 (40.1)             | 105 (59.3)      | 120 (67.8)                             | 9 (5-19) vs. 8 (4-16) <sup>g</sup> | 3.7 (2.9-4.4) <sup>g</sup> (CRP) | -              | -                          |
| Chen 2013 [41]    | China    | Cross-sectional              | 103        | 49.1±14.7                | 27 (26.2)             | 2 (1.9)         | 63 (61.2)                              | 4.3±5.7                            | 4.4±1.4                          | -              | -                          |
| Chen 2015 [42]    | China    | Cross-sectional              | 71         | 60.7±12.1 <sup>e</sup>   | 37 (52.1)             | 35 (49.3)       | 49 (69.0)                              | 12.8±10.3 vs. 8.4±8.1 (n=68)       | 3.7±1.2 vs. 3.3±1.7 (n=43)       | -              | -                          |
| Doyle 2015 [43]   | US       | Cross-sectional <sup>d</sup> | 75         | 61.5±12.7 <sup>e</sup>   | 11 (14.7)             | 41 (54.7)       | -                                      | -                                  | -                                | -              | -                          |

|    |              |        |                 |      |                        |           |            |                 |                        |                  |              |               |
|----|--------------|--------|-----------------|------|------------------------|-----------|------------|-----------------|------------------------|------------------|--------------|---------------|
| 1  |              |        |                 |      |                        |           |            |                 |                        |                  |              |               |
| 2  |              |        |                 |      |                        |           |            |                 |                        |                  |              |               |
| 3  |              |        |                 |      |                        |           |            |                 |                        |                  |              |               |
| 4  |              |        |                 |      |                        |           |            |                 |                        |                  |              |               |
| 5  | Abdel-Hamid  | Egypt  | Cross-sectional | 50   | 45.8±12.3              | 2 (4.0)   | -          | 19 (38.0)       | 9.8±6.6                | 4.7±1.3          | 0            | -             |
| 6  | 2019 [44]    |        |                 |      |                        |           |            |                 |                        |                  |              |               |
| 7  |              |        |                 |      |                        |           |            |                 |                        |                  |              |               |
| 8  | Akiyama      | Japan  | Cross-sectional | 395  | 58.5±13.1              | 49 (12.4) | 69 (20.3)  | 78 (19.7)       | 129.4±115.2            | 4.9±1.6 (n=372)  | 38 (SS, SSc, | -             |
| 9  | 2016 [45]    |        |                 |      |                        |           | (n=340)    |                 | (months)               |                  | PM/DM,       |               |
| 10 |              |        |                 |      |                        |           |            |                 |                        |                  | SLE)         |               |
| 11 |              |        |                 |      |                        |           |            |                 |                        |                  |              |               |
| 12 |              |        |                 |      |                        |           |            |                 |                        |                  |              |               |
| 13 |              |        |                 |      |                        |           |            |                 |                        |                  |              |               |
| 14 | Alexiou 2008 | Greece | Case-control    | 136  | -                      | -         | -          | N/A (ILD 11/no  | -                      | -                | -            | -             |
| 15 | [46]         |        |                 |      |                        |           |            | ILD 125)        |                        |                  |              |               |
| 16 |              |        |                 |      |                        |           |            |                 |                        |                  |              |               |
| 17 |              |        |                 |      |                        |           |            |                 |                        |                  |              |               |
| 18 | Correia 2019 | US     | Cross-sectional | 453  | 59.6±15.7              | (19.4)    | -          | (6.0)           | -                      | -                | 0            | -             |
| 19 | [47]         |        |                 |      |                        |           |            |                 |                        |                  |              |               |
| 20 |              |        |                 |      |                        |           |            |                 |                        |                  |              |               |
| 21 |              |        |                 |      |                        |           |            |                 |                        |                  |              |               |
| 22 |              |        |                 |      |                        |           |            |                 |                        |                  |              |               |
| 23 | Fadda 2018   | Egypt  | Cross-sectional | 88   | 50.2±9.0               | 13 (14.8) | 87 (98.9)  | 63 (71.6)       | 10.2±6.2               | 14 (1-32) vs. 12 | 0            | UIP 62%, NSIP |
| 24 | [48]         |        |                 |      |                        |           |            |                 |                        | (3-25) (median   |              | 27%, Mixed 1% |
| 25 |              |        |                 |      |                        |           |            |                 |                        | (range)) (CDAI)  |              |               |
| 26 |              |        |                 |      |                        |           |            |                 |                        |                  |              |               |
| 27 |              |        |                 |      |                        |           |            |                 |                        |                  |              |               |
| 28 | Furukawa     | Japan  | Case-control    | 450  | 63.9±10.9 <sup>e</sup> | 89 (19.8) | 130 (28.9) | N/A (ILD 129/no | 14.5±10.9 <sup>e</sup> | -                | -            | -             |
| 29 | 2012 [49]    |        |                 |      |                        |           |            | ILD 321)        |                        |                  |              |               |
| 30 |              |        |                 |      |                        |           |            |                 |                        |                  |              |               |
| 31 |              |        |                 |      |                        |           |            |                 |                        |                  |              |               |
| 32 |              |        |                 |      |                        |           |            |                 |                        |                  |              |               |
| 33 | Kakutani     | Japan  | Cross-sectional | 2702 | 62.8±12.5              | (17.8)    | (28.9)     | 261 (9.7)       | 9 (15) vs. 10 (17)     | 3.2±1.0 (ESR)    | -            | -             |
| 34 | 2019 [50]    |        |                 |      |                        |           |            |                 | (median (IQR))         |                  |              |               |
| 35 |              |        |                 |      |                        |           |            |                 |                        |                  |              |               |
| 36 |              |        |                 |      |                        |           |            |                 |                        |                  |              |               |
| 37 |              |        |                 |      |                        |           |            |                 |                        |                  |              |               |
| 38 |              |        |                 |      |                        |           |            |                 |                        |                  |              |               |
| 39 |              |        |                 |      |                        |           |            |                 |                        |                  |              |               |
| 40 |              |        |                 |      |                        |           |            |                 |                        |                  |              |               |
| 41 |              |        |                 |      |                        |           |            |                 |                        |                  |              |               |
| 42 |              |        |                 |      |                        |           |            |                 |                        |                  |              |               |
| 43 |              |        |                 |      |                        |           |            |                 |                        |                  |              |               |
| 44 |              |        |                 |      |                        |           |            |                 |                        |                  |              |               |
| 45 |              |        |                 |      |                        |           |            |                 |                        |                  |              |               |
| 46 |              |        |                 |      |                        |           |            |                 |                        |                  |              |               |



1  
2  
3  
4  
5  
6  
7  
8  
9  
10  
11  
12  
13  
14  
15  
16  
17  
18  
19  
20  
21  
22  
23  
24  
25  
26  
27  
28  
29  
30  
31  
32  
33  
34  
35  
36  
37  
38  
39  
40  
41  
42  
43  
44  
45  
46

|                    |        |                 |     |                                                         |            |           |                          |                                                  |               |                    |                        |
|--------------------|--------|-----------------|-----|---------------------------------------------------------|------------|-----------|--------------------------|--------------------------------------------------|---------------|--------------------|------------------------|
| Kelly 2014 [51]    | UK     | Case-control    | 460 | -                                                       | 220 (47.8) | -         | N/A (ILD 230/no ILD 230) | -                                                | -             | -                  | -                      |
| Liu 2019 [52]      | China  | Cross-sectional | 101 | 54 (17) (median (IQR))                                  | 26 (25.7)  | -         | 23 (22.8)                | 7 (14) (median (IQR))                            | 4.0±1.9       | -                  | -                      |
| Matsuo 2018 [53]   | Japan  | Cross-sectional | 312 | 63.5±12.7                                               | 41 (13.1)  | 95 (30.4) | 26 (8.3)                 | 14.9±11.6                                        | 2.5±1.1 (CRP) | 11 (not specified) | -                      |
| Mori 2012 [54]     | Japan  | Cross-sectional | 356 | 72.5 (12.3) (n=24) vs. 59.0 (16) (n=302) (median (IQR)) | 85 (23.9)  | 76 (21.3) | 24 (6.7)                 | 1.5 (6.3) (n=24) vs 0 (6) (n=302) (median (IQR)) | -             | -                  | UIP 5, NSIP 19         |
| Ortancil 2011 [55] | Turkey | Cross-sectional | 67  | 57.4±13.5                                               | 14 (20.9)  | -         | 12 (17.9)                | 10.2±11.7 <sup>e</sup>                           | -             | -                  | -                      |
| Park 2016 [56]     | Korea  | Cross-sectional | 83  | 53.7±10.1 <sup>e</sup>                                  | 10 (12.0)  | -         | 7 (8.4)                  | -                                                | -             | -                  | UIP 6, Indeterminate 1 |

|    |             |           |                 |     |                        |            |            |                 |                        |                      |   |   |
|----|-------------|-----------|-----------------|-----|------------------------|------------|------------|-----------------|------------------------|----------------------|---|---|
| 1  |             |           |                 |     |                        |            |            |                 |                        |                      |   |   |
| 2  |             |           |                 |     |                        |            |            |                 |                        |                      |   |   |
| 3  |             |           |                 |     |                        |            |            |                 |                        |                      |   |   |
| 4  |             |           |                 |     |                        |            |            |                 |                        |                      |   |   |
| 5  | Paulin 2019 | Argentina | Case-control    | 118 | 56.7±15.7              | 26 (22.0)  | 52 (44.1)  | N/A (ILD 52/ no | 6 (8) (median          | 3.4±1.1              | - | - |
| 6  | [57]        |           |                 |     |                        |            |            | ILD 66)         | (IQR))                 |                      |   |   |
| 7  |             |           |                 |     |                        |            |            |                 |                        |                      |   |   |
| 8  | Restrepo    | US        | Cross-sectional | 779 | 53.7±13.3              | 161 (25.5) | 357 (56.5) | 69 (8.9)        | 10.5±10.3 <sup>e</sup> | 5.4±1.4 <sup>e</sup> | - | - |
| 9  | 2015 [58]   |           |                 |     | (n=632) <sup>e</sup>   | (n=632)    | (n=632)    |                 |                        |                      |   |   |
| 10 |             |           |                 |     |                        |            |            |                 |                        |                      |   |   |
| 11 |             |           |                 |     |                        |            |            |                 |                        |                      |   |   |
| 12 | Rocha-Munoz | Mexico    | Case-control    | 81  | 51.0                   | -          | 22 (27.2)  | N/A (ILD 39/no  | 7.0 (1.0-35.0) vs.     | 3.9 (1.7-5.3) vs.    | 0 | - |
| 13 | 2015 [59]   |           |                 |     | (36.0-72.0)            |            |            | ILD 42)         | 6.5 (0.75-25.0)        | 2.5 (1.7-5.1)        |   |   |
| 14 |             |           |                 |     | vs. 49.0               |            |            |                 | (median (range))       | (median (range))     |   |   |
| 15 |             |           |                 |     | (24.0-73.0)            |            |            |                 |                        |                      |   |   |
| 16 |             |           |                 |     | (median                |            |            |                 |                        |                      |   |   |
| 17 |             |           |                 |     | (range))               |            |            |                 |                        |                      |   |   |
| 18 |             |           |                 |     |                        |            |            |                 |                        |                      |   |   |
| 19 |             |           |                 |     |                        |            |            |                 |                        |                      |   |   |
| 20 |             |           |                 |     |                        |            |            |                 |                        |                      |   |   |
| 21 |             |           |                 |     |                        |            |            |                 |                        |                      |   |   |
| 22 |             |           |                 |     |                        |            |            |                 |                        |                      |   |   |
| 23 |             |           |                 |     |                        |            |            |                 |                        |                      |   |   |
| 24 | Sargin 2018 | Turkey    | Cross-sectional | 83  | 59.3±12.1              | 20 (24.1)  | 9 (10.8)   | 43 (51.8)       | -                      | -                    | 0 | - |
| 25 | [60]        |           |                 |     |                        |            |            |                 |                        |                      |   |   |
| 26 |             |           |                 |     |                        |            |            |                 |                        |                      |   |   |
| 27 |             |           |                 |     |                        |            |            |                 |                        |                      |   |   |
| 28 | Sulaiman    | Malaysia  | Cross-sectional | 159 | 48.3±14.1              | 25 (15.7)  | -          | 21 (13.2)       | -                      | 4.7±0.9 (ESR)        | 0 | - |
| 29 | 2019 [61]   |           |                 |     |                        |            |            |                 |                        |                      |   |   |
| 30 |             |           |                 |     |                        |            |            |                 |                        |                      |   |   |
| 31 |             |           |                 |     |                        |            |            |                 |                        |                      |   |   |
| 32 | Tian 2016   | China     | Cross-sectional | 75  | -                      | 29 (38.7)  | -          | 37 (49.3)       | -                      | -                    | - | - |
| 33 | [62]        |           |                 |     |                        |            |            |                 |                        |                      |   |   |
| 34 |             |           |                 |     |                        |            |            |                 |                        |                      |   |   |
| 35 |             |           |                 |     |                        |            |            |                 |                        |                      |   |   |
| 36 | Wang 2015   | China     | Cross-sectional | 41  | 60.7±12.4 <sup>e</sup> | 20 (48.8)  | -          | 25 (61.0)       | 108 (5-360) vs. 72     | -                    | - | - |
| 37 |             |           |                 |     |                        |            |            |                 |                        |                      |   |   |
| 38 |             |           |                 |     |                        |            |            |                 |                        |                      |   |   |

|      |               |       |                 |     |                               |           |           |                                     | (2-552) (months)                              |         |                                                          |   |
|------|---------------|-------|-----------------|-----|-------------------------------|-----------|-----------|-------------------------------------|-----------------------------------------------|---------|----------------------------------------------------------|---|
|      |               |       |                 |     |                               |           |           |                                     | (median (range))                              |         |                                                          |   |
| [63] | Yang 2019     | Korea | Case-control    | 308 | 57.0±12.0 <sup>e</sup>        | 76 (24.7) | 39 (17.7) | N/A (ILD 77/ no<br>(n=220) ILD 231) | 11.0±7.3 <sup>e</sup>                         | -       | -                                                        | - |
| [64] | Yin 2014 [65] | China | Cross-sectional | 285 | 51.7±13.4 <sup>e</sup>        | 74 (26.0) | 59 (20.7) | 71 (24.9)                           | 9.0 (16.0) vs. 4.0<br>(9.1) (median<br>(IQR)) | 5.4±1.7 | 61 <sup>f</sup> (SS 41,<br>SSc 7,<br>PM/DM 4,<br>SLE 16) | - |
| [66] | Zhang 2018    | China | Case-control    | 75  | 41-69 vs.<br>40-70<br>(range) | 30 (40.0) | -         | N/A (ILD 28/ no<br>ILD 47)          | -                                             | -       | 0                                                        | - |

a, Comparisons correspond to RA-ILD vs. RA without ILD and the values are expressed as mean±SD or number (proportion) unless otherwise specified;

b, N/A indicates not applicable due to case-control studies;

c, Disease activity was estimated using disease activity score (DAS) 28 unless otherwise specified and a laboratory marker used to calculate the score was described as either ESR or CRP if it was specified;

d, indicates a prospective study while all of the other studies are retrospectively designed;

1  
2  
3  
4 e, calculated combining the figure in both comparative groups;  
5

6 f, some patients had multiple CTDs;  
7

8 g, unknown statistics;  
9

10  
11 CDAI, clinical disease activity index; CRP, C-reactive protein; CTD, connective tissue disease; ESR, erythrocyte sedimentation rate; HRCT, high  
12 resolution computed tomography; ILD, interstitial lung disease; IQR, interquartile range; NSIP, non-specific interstitial pneumonia;  
13 PM/DM, polymyositis/dermatomyositis; RA, rheumatoid arthritis; SLE, systemic lupus erythematosus; SS, Sjögren syndrome; SSc,  
14 systemic sclerosis; UIP, usual interstitial pneumonia;  
15  
16  
17  
18  
19  
20  
21  
22  
23  
24  
25  
26  
27  
28  
29  
30  
31  
32  
33  
34  
35  
36  
37  
38  
39  
40  
41  
42  
43  
44  
45  
46

Table 2 Anti-cyclic citrullinated peptide (CCP) antibody tests and its association with rheumatoid arthritis-associated interstitial lung disease<sup>a</sup>

| Study             | Measurements of anti-CCP antibody (manufacturer) (cut-off points) | Proportion of anti-CCP antibody | Titres of anti-CCP antibody                              | Univariate result (positivity) | Univariate result (titre)   | Multivariate result (positivity) | Multivariate result (titre) | Adjusted variables |
|-------------------|-------------------------------------------------------------------|---------------------------------|----------------------------------------------------------|--------------------------------|-----------------------------|----------------------------------|-----------------------------|--------------------|
| Alunno 2018 [38]  | Second generation (Thermo Fisher Scientific or Aesku)             | 28/37 (75.7) vs. 90/146 (61.6)  | -                                                        | OR 1.94 (0.85-4.42)            | -                           | -                                | -                           | -                  |
| England 2019 [39] | Second generation                                                 | (86.7) vs. (76.7)               | -                                                        | <b>OR 1.98, p=0.03</b>         | -                           | -                                | -                           | -                  |
| Giles 2014 [40]   | Second generation                                                 | 51/57 (89.5) vs. 82/120 (68.3)  | 152 (99-194) (n=32) vs. 89 (11-152) (n=120) <sup>d</sup> | <b>OR 3.94 (1.57-9.90)</b>     | <b>p=0.0005<sup>b</sup></b> | -                                | -                           | -                  |
| Chen 2013 [41]    | Not specified                                                     | -                               | 231.8±178.0 (n=63) vs. 196.8±161.1 (n=40)                | -                              | MD 35.0 (-33.0-103.0)       | -                                | -                           | -                  |
| Chen 2015 [42]    | Not specified                                                     | -                               | 142.6±151.9 (n=49) vs. 154.6±151.4 (n=22)                | -                              | MD -12.0 (-88.2-64.2)       | -                                | -                           | -                  |

|    |              |                     |                  |                         |                            |                           |                   |                       |                       |
|----|--------------|---------------------|------------------|-------------------------|----------------------------|---------------------------|-------------------|-----------------------|-----------------------|
| 1  |              |                     |                  |                         |                            |                           |                   |                       |                       |
| 2  |              |                     |                  |                         |                            |                           |                   |                       |                       |
| 3  |              |                     |                  |                         |                            |                           |                   |                       |                       |
| 4  |              |                     |                  |                         |                            |                           |                   |                       |                       |
| 5  | Doyle 2015   | Not specified       | -                | 188±133 vs. 83±113      | -                          | -                         | -                 | -                     | -                     |
| 6  | [43]         |                     |                  |                         |                            |                           |                   |                       |                       |
| 7  |              |                     |                  |                         |                            |                           |                   |                       |                       |
| 8  | Abdel-Hamid  | Third generation    | 30/50 (60.0)     | 100 (390) (n=19) vs. 20 | -                          | <b>p=0.04<sup>b</sup></b> | -                 | -                     | -                     |
| 9  | 2019 [44]    |                     |                  | (298) (n=31) (median    |                            |                           |                   |                       |                       |
| 10 |              |                     |                  | (IQR))                  |                            |                           |                   |                       |                       |
| 11 |              |                     |                  |                         |                            |                           |                   |                       |                       |
| 12 |              |                     |                  |                         |                            |                           |                   |                       |                       |
| 13 |              |                     |                  |                         |                            |                           |                   |                       |                       |
| 14 | Akiyama      | Not specified (≥4.5 | 69/75 (92.0) vs. | -                       | <b>OR 2.82 (1.17-6.81)</b> | -                         | OR 1.80           | -                     | age, sex, smoking, RF |
| 15 | 2016 [45]    | U/mL)               | 245/305 (80.3)   |                         |                            |                           | (0.70-4.40)       |                       |                       |
| 16 |              |                     |                  |                         |                            |                           | (positive with    |                       |                       |
| 17 |              |                     |                  |                         |                            |                           | high titre (>13.5 |                       |                       |
| 18 |              |                     |                  |                         |                            |                           | U/mL))            |                       |                       |
| 19 |              |                     |                  |                         |                            |                           |                   |                       |                       |
| 20 |              |                     |                  |                         |                            |                           |                   |                       |                       |
| 21 |              |                     |                  |                         |                            |                           |                   |                       |                       |
| 22 |              |                     |                  |                         |                            |                           |                   |                       |                       |
| 23 |              |                     |                  |                         |                            |                           |                   |                       |                       |
| 24 | Alexiou 2008 | Second generation   | 10/11 (90.9) vs. | 152.6±104.5 (n=11) vs.  | OR 7.12 (0.89-56.9)        | <b>MD 79.5</b>            | -                 | -                     | -                     |
| 25 | [46]         | (INOVA Diagnostics) | 73/125 (58.4)    | 73.1±114.0 (n=125)      |                            | <b>(9.72-149.3)</b>       |                   |                       |                       |
| 26 |              | (20 IU/mL)          |                  |                         |                            |                           |                   |                       |                       |
| 27 |              |                     |                  |                         |                            |                           |                   |                       |                       |
| 28 |              |                     |                  |                         |                            |                           |                   |                       |                       |
| 29 |              |                     |                  |                         |                            |                           |                   |                       |                       |
| 30 | Correia 2019 | Second generation   | -                | 113.0±5.9 (162.4 vs.    | OR 1.51 (0.48-4.74)        | <b>p=0.04<sup>b</sup></b> | -                 | <b>OR 1.41</b>        | age, smoking          |
| 31 | [47]         | (Euro-Diagnostica)  |                  | 109.9) (mean±SE)        | (low titre), 2.61          |                           |                   | <b>(1.01-1.97)/1</b>  |                       |
| 32 |              | (≥6 U/mL)           |                  |                         | (0.59-11.5)( moderate      |                           |                   | <b>group of titre</b> |                       |
| 33 |              |                     |                  |                         | titre), 2.83 (0.96-8.39)   |                           |                   |                       |                       |
| 34 |              |                     |                  |                         | (high titre)               |                           |                   |                       |                       |
| 35 |              |                     |                  |                         |                            |                           |                   |                       |                       |
| 36 |              |                     |                  |                         |                            |                           |                   |                       |                       |
| 37 |              |                     |                  |                         |                            |                           |                   |                       |                       |
| 38 |              |                     |                  |                         |                            |                           |                   |                       |                       |

1  
2  
3  
4  
5  
6  
7  
8  
9  
10  
11  
12  
13  
14  
15  
16  
17  
18  
19  
20  
21  
22  
23  
24  
25  
26  
27  
28  
29  
30  
31  
32  
33  
34  
35  
36  
37  
38  
39  
40  
41  
42  
43  
44  
45  
46

|                    |                                                         |                                   |                                                              |                            |                                                                          |                         |   |                       |
|--------------------|---------------------------------------------------------|-----------------------------------|--------------------------------------------------------------|----------------------------|--------------------------------------------------------------------------|-------------------------|---|-----------------------|
| Fadda 2018 [48]    | Third generation (INOVA Diagnostics) (20 U/mL)          | 84/88 (95.5)                      | 220 (0-500) (n=63) vs. 120 (30-400) (n=25), (median (range)) | -                          | <b>MD 67.5 (19.5-115.5)<sup>e</sup>, OR1.006 (1.001-1.011) (/1 U/mL)</b> | -                       | - | -                     |
| Furukawa 2012 [49] | Not specified (Medical & Biological Laboratories)       | 116/129 (89.9) vs. 278/321 (86.6) | -                                                            | OR 1.38 (0.71-2.69)        | -                                                                        | -                       | - | -                     |
| Kakutani 2019 [50] | Not specified                                           | (93.2) vs. (82.9)                 | -                                                            | <b>OR 2.83, p=0.002</b>    | -                                                                        | -                       | - | -                     |
| Kelly 2014 [51]    | Not specified                                           | -                                 | 180 (8-340) vs. 78 (8-340) (median (range))                  | <b>OR 4.00 (2.00-7.80)</b> | <b>p=0.02<sup>b</sup></b>                                                | <b>OR 0.33, p=0.003</b> | - | age, sex, smoking, RF |
| Liu 2019 [52]      | Second generation (Euro- Diagnostica) ( $\geq 25$ U/mL) | 77/101 (76.2)                     | -                                                            | OR 0.64 (0.23-1.80)        | -                                                                        | -                       | - | -                     |

|    |               |                      |                  |                                           |                            |                                  |                 |                    |                      |
|----|---------------|----------------------|------------------|-------------------------------------------|----------------------------|----------------------------------|-----------------|--------------------|----------------------|
| 1  |               |                      |                  |                                           |                            |                                  |                 |                    |                      |
| 2  |               |                      |                  |                                           |                            |                                  |                 |                    |                      |
| 3  |               |                      |                  |                                           |                            |                                  |                 |                    |                      |
| 4  |               |                      |                  |                                           |                            |                                  |                 |                    |                      |
| 5  | Matsuo 2018   | Not specified        | 25/26 (96.2) vs. | 199.7±104.6 (n=26) vs.                    | <b>OR 5.43 (1.11-98.0)</b> | <b>MD 79.0</b>                   | -               | <b>OR 1.08</b>     | age, smoking, RF,    |
| 6  | [53]          |                      | 235/286 (82.2)   | 120.7±112.6 (n=286)                       |                            | <b>(34.1-123.9),</b>             |                 | <b>(1.03-1.12)</b> | LDH, CRP, ESR,       |
| 7  |               |                      |                  |                                           |                            | <b>OR 1.06</b>                   |                 | <b>(/10U/mL)</b>   | KL-6, MMP-3, IL18,   |
| 8  |               |                      |                  |                                           |                            | <b>(1.02-1.10)</b>               |                 |                    | dose of MTX, dose of |
| 9  |               |                      |                  |                                           |                            | <b>(/10U/mL)</b>                 |                 |                    | PSL                  |
| 10 |               |                      |                  |                                           |                            |                                  |                 |                    |                      |
| 11 |               |                      |                  |                                           |                            |                                  |                 |                    |                      |
| 12 |               |                      |                  |                                           |                            |                                  |                 |                    |                      |
| 13 |               |                      |                  |                                           |                            |                                  |                 |                    |                      |
| 14 | Mori 2012     | Second generation    | 24/24 (100) vs.  | 283.5 (99.0-794.0)                        | OR 6.41 (0.38-107.8)       | <b>MD 275.2</b>                  | RR 2.73         | -                  | age, sex, smoking,   |
| 15 | [54]          | (Axis-Shield         | 294/332 (88.6)   | (n=24) vs. 81.1                           |                            | <b>(184.1-366.3)<sup>c</sup></b> | (0.91-8.23)     |                    | advanced stage, RF,  |
| 16 |               | Diagnostic) (>4.6    |                  | (21.0-249.0) (n=302)                      |                            |                                  | (positive with  |                    | HLA-DRB1*04,         |
| 17 |               | U/mL)                |                  | (median (1 <sup>st</sup> -3 <sup>rd</sup> |                            |                                  | high titre (≥90 |                    | HLA-DRB1*1502        |
| 18 |               |                      |                  | quartile)                                 |                            |                                  | U/mL))          |                    |                      |
| 19 |               |                      |                  |                                           |                            |                                  |                 |                    |                      |
| 20 |               |                      |                  |                                           |                            |                                  |                 |                    |                      |
| 21 |               |                      |                  |                                           |                            |                                  |                 |                    |                      |
| 22 |               |                      |                  |                                           |                            |                                  |                 |                    |                      |
| 23 | Ortancil 2011 | Second generation    | 7/12 (58.3) vs.  | -                                         | OR 1.45 (0.41-5.08)        | -                                | -               | -                  | -                    |
| 24 | [55]          | (Euroimmun)          | 27/55 (49.1)     |                                           |                            |                                  |                 |                    |                      |
| 25 |               |                      |                  |                                           |                            |                                  |                 |                    |                      |
| 26 |               |                      |                  |                                           |                            |                                  |                 |                    |                      |
| 27 | Park 2016     | Not specified (Roche | 69/83 (83.1)     | -                                         | -                          | 0.22 <sup>c</sup>                | -               | -                  | -                    |
| 28 | [56]          | Diagnostics) (≥17.0  |                  |                                           |                            |                                  |                 |                    |                      |
| 29 |               | U/mL)                |                  |                                           |                            |                                  |                 |                    |                      |
| 30 |               |                      |                  |                                           |                            |                                  |                 |                    |                      |
| 31 |               |                      |                  |                                           |                            |                                  |                 |                    |                      |
| 32 |               |                      |                  |                                           |                            |                                  |                 |                    |                      |
| 33 | Paulin 2019   | Second generation    | 45/47 (95.7) vs. | -                                         | OR 0.98 (0.13-7.24)        | -                                | -               | -                  | -                    |
| 34 | [57]          |                      | 46/48 (95.8)     |                                           |                            |                                  |                 |                    |                      |
| 35 |               |                      |                  |                                           |                            |                                  |                 |                    |                      |
| 36 |               |                      |                  |                                           |                            |                                  |                 |                    |                      |
| 37 |               |                      |                  |                                           |                            |                                  |                 |                    |                      |
| 38 |               |                      |                  |                                           |                            |                                  |                 |                    |                      |
| 39 |               |                      |                  |                                           |                            |                                  |                 |                    |                      |
| 40 |               |                      |                  |                                           |                            |                                  |                 |                    |                      |
| 41 |               |                      |                  |                                           |                            |                                  |                 |                    |                      |
| 42 |               |                      |                  |                                           |                            |                                  |                 |                    |                      |
| 43 |               |                      |                  |                                           |                            |                                  |                 |                    |                      |
| 44 |               |                      |                  |                                           |                            |                                  |                 |                    |                      |
| 45 |               |                      |                  |                                           |                            |                                  |                 |                    |                      |
| 46 |               |                      |                  |                                           |                            |                                  |                 |                    |                      |



|                          |                                                                |                                    |                                                                                                                 |                             |                                                                                        |               |                                      |                                                                                                 |
|--------------------------|----------------------------------------------------------------|------------------------------------|-----------------------------------------------------------------------------------------------------------------|-----------------------------|----------------------------------------------------------------------------------------|---------------|--------------------------------------|-------------------------------------------------------------------------------------------------|
| Restrepo<br>2015 [58]    | Not specified<br>(TheraTest) ( $\geq 7$<br>IU/mL)              | 44/69 (63.8) vs.<br>341/563 (60.6) | 5.54 $\pm$ 1.49 (n=69) vs.<br>4.68 $\pm$ 1.52 (n=563) (log<br>anti-CCP antibody titre)                          | OR 1.15 (0.69-1.91)         | <b>MD 0.86</b><br><b>(0.49-1.23) (log</b><br><b>anti-CCP</b><br><b>antibody titre)</b> | Not specified | Not specified                        | age, sex, disease<br>duration, DAS28, RF,<br>HLA-DRB1*SE, PSL<br>use                            |
| Rocha-Munoz<br>2015 [59] | Second generation<br>(Euroimmun) (>20<br>U/mL)                 | 39/39 (100) vs.<br>27/42 (64.3)    | 77.9 vs. 30.2 (median)                                                                                          | <b>OR 44.5 (2.54-778.3)</b> | <b>p&lt;0.001<sup>b</sup></b>                                                          | -             | <b>OR 1.06</b><br><b>(1.02-1.10)</b> | age, smoking, disease<br>duration, , DAS28,<br>HAQ-Di, RF, ESR,<br>duration of MTX<br>treatment |
| Sargin 2018<br>[60]      | Not specified                                                  | -                                  | 19.5 (1.8-140.8) (n=43)<br>vs. 6.2 (0.5-15.9)<br>(n=40) (median (1 <sup>st</sup> -3 <sup>rd</sup><br>quartile)) | -                           | MD 9.8<br>(-34.1-53.7) <sup>e</sup>                                                    | -             | -                                    | -                                                                                               |
| Sulaiman<br>2019 [61]    | Second generation<br>(Euro-Diagnostica)<br>( $\geq 20.0$ U/mL) | 13/21 (61.9) vs.<br>70/138 (50.7)  | -                                                                                                               | OR 1.58 (0.62-4.05)         | -                                                                                      | -             | -                                    | -                                                                                               |
| Tian 2016<br>[62]        | Not specified<br>(Euroimmun) ( $\geq 25$                       | 30/37 (81.1) vs.<br>28/38 (73.7)   | 475.2 $\pm$ 551.8 (n=37) vs.<br>332.0 $\pm$ 418.6 (n=38)                                                        | OR 1.53 (0.51-4.59)         | MD 143.2<br>(-78.1-364.5)                                                              | -             | -                                    | -                                                                                               |

|                    | RU/mL)                                                |                                   |                                                                                   |                            |                                        |                                      |   |                       |
|--------------------|-------------------------------------------------------|-----------------------------------|-----------------------------------------------------------------------------------|----------------------------|----------------------------------------|--------------------------------------|---|-----------------------|
| Wang 2015<br>[63]  | Not specified                                         | -                                 | 296.4 (1.91-500.0)<br>(n=25) vs. 392.9<br>(7.00-500.0) (n=16)<br>(median (range)) | -                          | MD -49.5<br>(-132.2-33.2) <sup>e</sup> | -                                    | - | -                     |
| Yang 2019<br>[64]  | Not specified ( $\geq 5.0$<br>IU/mL)                  | 33/43 (76.7) vs.<br>95/142 (66.9) | 242.8 $\pm$ 234.4 (n=43) vs.<br>125.3 $\pm$ 144.3 (n=142)                         | OR 1.63 (0.74-3.57)        | <b>MD 117.5</b><br><b>(59.7-175.3)</b> | -                                    | - | -                     |
| Yin 2014 [65]      | Second generation<br>(Euroimmun) ( $\geq 25$<br>U/mL) | 207/285 (72.6)                    | -                                                                                 | <b>OR 3.83 (1.74-8.43)</b> | -                                      | <b>OR 3.50</b><br><b>(1.52-8.04)</b> | - | age, disease duration |
| Zhang 2018<br>[66] | Not specified                                         | -                                 | 3.09 $\pm$ 0.34 (n=28) vs.<br>3.05 $\pm$ 0.32 (n=47)                              | -                          | MD 0.04<br>(-0.12-0.20)                | -                                    | - | -                     |

a, Comparisons correspond to RA-ILD vs. RA without ILD and the values are expressed as mean $\pm$ SD or number (proportion) unless otherwise specified. The value with an interval in the parenthesis indicates 95% confidence interval. Text in bold indicates statistical significance;

b, the difference of the titre of anti-CCP antibody between RA with and without ILD could not be calculated due to unavailability of relevant summary statistics, no information of the number of subjects and/or unknown summary statistics;

c, indicates correlation coefficient between anti-CCP antibody and a total ILD score;

1  
2  
3  
4 d, unknown statistics;  
5

6 e, MDs (95% confidence interval) were calculated converting the median, range or interquartile range to the mean and standard  
7 deviation, using a formula reported by a previous study;<sup>[32]</sup>  
8  
9

10 CCP, cyclic citrullinated peptide; CRP, C-reactive protein; DAS28, disease activity score 28; ESR, erythrocyte sedimentation rate;  
11 HAQ-Di, health assessment questionnaire-disability index; HLA, human leukocyte antigen; IL-18, interleukin-18; ILD, interstitial lung  
12 disease; IQR, interquartile range; KL-6, Krebs von den Lungen-6; LDH, lactate dehydrogenase; MD, mean difference; MMP-3, matrix  
13 metalloproteinase-3; MTX, methotrexate; OR, odds ratio; PSL, prednisolone; RA, rheumatoid arthritis; RF, rheumatoid factor; RR, risk  
14 ratio; SE, shared epitope;  
15  
16  
17  
18  
19  
20  
21  
22  
23  
24  
25  
26  
27  
28  
29  
30  
31  
32  
33  
34  
35  
36  
37  
38  
39  
40  
41  
42  
43  
44  
45  
46

Table 3 Risk of bias in individual studies

| Study                 | Study participation | Anti-CCP antibody measurement | ILD confirmation | Study confounding | Statistical analysis and reporting |
|-----------------------|---------------------|-------------------------------|------------------|-------------------|------------------------------------|
| Alunno 2018 [38]      | moderate risk       | low risk                      | <b>high risk</b> | <b>high risk</b>  | <b>high risk</b>                   |
| England 2019 [39]     | moderate risk       | <b>high risk</b>              | <b>high risk</b> | low risk          | <b>high risk</b>                   |
| Giles 2014 [40]       | moderate risk       | low risk                      | <b>high risk</b> | moderate risk     | <b>high risk</b>                   |
| Chen 2013 [41]        | low risk            | <b>high risk</b>              | low risk         | moderate risk     | <b>high risk</b>                   |
| Chen 2015 [42]        | moderate risk       | low risk                      | low risk         | moderate risk     | <b>high risk</b>                   |
| Doyle 2015 [43]       | moderate risk       | moderate risk                 | low risk         | moderate risk     | <b>high risk</b>                   |
| Abdel-Hamid 2019 [44] | moderate risk       | moderate risk                 | <b>high risk</b> | moderate risk     | <b>high risk</b>                   |
| Akiyama 2016 [45]     | low risk            | moderate risk                 | <b>high risk</b> | moderate risk     | moderate risk                      |
| Alexiou 2008 [46]     | moderate risk       | low risk                      | <b>high risk</b> | <b>high risk</b>  | <b>high risk</b>                   |
| Correia 2019 [47]     | moderate risk       | low risk                      | low risk         | moderate risk     | <b>high risk</b>                   |
| Fadda 2018 [48]       | moderate risk       | low risk                      | low risk         | moderate risk     | <b>high risk</b>                   |
| Furukawa2012 [49]     | moderate risk       | low risk                      | <b>high risk</b> | moderate risk     | <b>high risk</b>                   |
| Kakutani 2019 [50]    | low risk            | <b>high risk</b>              | <b>high risk</b> | moderate risk     | <b>high risk</b>                   |

1  
2  
3  
4  
5  
6  
7  
8  
9  
10  
11  
12  
13  
14  
15  
16  
17  
18  
19  
20  
21  
22  
23  
24  
25  
26  
27  
28  
29  
30  
31  
32  
33  
34  
35  
36  
37  
38  
39  
40  
41  
42  
43  
44  
45  
46

---

|                       |                  |                  |                  |                  |                  |
|-----------------------|------------------|------------------|------------------|------------------|------------------|
| Kelly 2014 [51]       | moderate risk    | <b>high risk</b> | low risk         | moderate risk    | <b>high risk</b> |
| Liu 2019 [52]         | moderate risk    | low risk         | <b>high risk</b> | moderate risk    | <b>high risk</b> |
| Matsuo 2018 [53]      | low risk         | moderate risk    | <b>high risk</b> | moderate risk    | moderate risk    |
| Mori2012 [54]         | low risk         | low risk         | low risk         | moderate risk    | moderate risk    |
| Ortancil 2011 [55]    | moderate risk    | low risk         | <b>high risk</b> | moderate risk    | <b>high risk</b> |
| Park2016 [56]         | low risk         | low risk         | low risk         | <b>high risk</b> | <b>high risk</b> |
| Paulin 2019 [57]      | moderate risk    | <b>high risk</b> | <b>high risk</b> | moderate risk    | <b>high risk</b> |
| Restrepo 2015 [58]    | moderate risk    | low risk         | <b>high risk</b> | moderate risk    | moderate risk    |
| Rocha-Munoz 2015 [59] | moderate risk    | low risk         | <b>high risk</b> | moderate risk    | low risk         |
| Sargin 2018 [60]      | moderate risk    | <b>high risk</b> | <b>high risk</b> | moderate risk    | <b>high risk</b> |
| Sulaiman 2019 [61]    | moderate risk    | low risk         | <b>high risk</b> | <b>high risk</b> | <b>high risk</b> |
| Tian 2016 [62]        | <b>high risk</b> | low risk         | <b>high risk</b> | moderate risk    | <b>high risk</b> |
| Wang 2015 [63]        | moderate risk    | <b>high risk</b> | low risk         | <b>high risk</b> | <b>high risk</b> |
| Yang 2019 [64]        | moderate risk    | <b>high risk</b> | moderate risk    | moderate risk    | moderate risk    |
| Yin 2014 [65]         | moderate risk    | low risk         | low risk         | moderate risk    | moderate risk    |

---

1  
2  
3  
4  
5 Zhang 2018 [66]      **high risk**      **high risk**      **high risk**      **high risk**      **high risk**  
6

---

7 Text in bold indicates high risk of bias

8  
9 CCP, cyclic citrullinated peptide; ILD, interstitial lung disease;  
10  
11  
12  
13  
14  
15  
16  
17  
18  
19  
20  
21  
22  
23  
24  
25  
26  
27  
28  
29  
30  
31  
32  
33  
34  
35  
36  
37  
38  
39  
40  
41  
42  
43  
44  
45  
46

For peer review only

1  
2  
3  
4  
5  
6  
7  
8  
9  
10  
11  
12  
13  
14  
15  
16  
17  
18  
19  
20  
21  
22  
23  
24  
25  
26  
27  
28  
29  
30  
31  
32  
33  
34  
35  
36  
37  
38  
39  
40  
41  
42  
43  
44  
45  
46

Table 4 Assessment of quality of evidence by the Grades of Recommendation, Assessment, Development and Evaluation (GRADE) system

---

Outcome: rheumatoid arthritis-associated interstitial lung disease

---

| GRADE factors                |              |       |                   |               |              |                  |             |                            |             |                 |
|------------------------------|--------------|-------|-------------------|---------------|--------------|------------------|-------------|----------------------------|-------------|-----------------|
| Prognostic factors           | Analysis     | Phase | Study limitations | Inconsistency | Indirectness | Publication bias | Imprecision | Moderate/large effect size | Dose effect | Overall quality |
| Anti-CCP antibody positivity | Univariate   | 1     | +                 | +             | -            | +                | -           | -                          | -           | very low        |
|                              | Multivariate | 1     | +                 | +             | -            | +                | -           | -                          | -           | very low        |
| Anti-CCP antibody titre      | Univariate   | 1     | +                 | +             | -            | +                | -           | -                          | -           | very low        |
|                              | Multivariate | 1     | +                 | -             | -            | +                | -           | -                          | +           | low             |

---

CCP, cyclic citrullinated peptide;

## Figure legends

### Figure 1 Study flow diagram

Out of a total of 827 records identified searching through five electronic databases, i.e., Medline, EMBASE, Science Citation Index Expanded, Cochrane Central Register of Controlled Trials and Google Scholar, 645 records were screened by titles and abstracts after removing 182 duplicates. After excluding 320 records consisting of non-English reports (n=16) and articles of ineligible types (n=304) (conference proceedings (n=153), case reports (n=72), editorials or letters (n=10) and review articles (n=69)) and 265 irrelevant reports, 60 records were retrieved as full-texts. Out of these, 31 records were excluded due to no specific pulmonary disease (n=7), no ILD (n=5), no risk estimates (n=11), no anti-CCP antibody (n=7) and no RA (n=1). The remaining 29 reports/studies were eligible for the review and additionally four reports were identified through a hand-search of references of eligible studies. As a result, a total of 33 reports/studies were considered for the review. Among them, four studies were excluded due to overlapped cohorts by other studies and finally a total of 29 studies/cohorts were focused for further analysis.

Figure 2 Forrest plot of the result of univariate analysis regarding the association of positivity of anti-citrullinated peptide (CCP) antibody with rheumatoid arthritis-associated interstitial lung disease (RA-ILD)

The results of univariate analyses in 19 studies were pooled for meta-analysis. The positivity of anti-CCP antibody was significantly associated with RA-ILD with an odds



1  
2  
3  
4  
5  
6 ratio (OR) of 2.10 (95% confidence interval: 1.59-2.78,  $p < 0.00001$ /95% prediction  
7  
8 interval: 0.93-4.76). There was moderate heterogeneity ( $\chi^2=29.7$ ,  $p=0.04$ ,  $I^2=39\%$ ).  
9

10  
11  
12  
13  
14 Figure 3 Forrest plot of the result of univariate analysis regarding the association of the  
15  
16 titre of anti-citrullinated peptide (CCP) antibody with rheumatoid arthritis-associated  
17  
18 interstitial lung disease (RA-ILD)  
19

20  
21 The results of univariate analyses in 12 studies were pooled for meta-analysis. The titre  
22  
23 of anti-CCP antibody was significantly higher for RA-ILD than RA without ILD with a  
24  
25 standardized mean difference (SMD) of 0.42 (95% confidence interval: 0.20-0.65,  
26  
27  $p=0.0002$ /95% prediction interval: -0.33-1.17). There was considerable heterogeneity  
28  
29 ( $\chi^2=36.0$ ,  $p=0.0002$ ,  $I^2=69\%$ ).  
30  
31  
32  
33  
34  
35  
36  
37  
38  
39  
40  
41  
42  
43  
44  
45  
46  
47  
48  
49  
50  
51  
52  
53  
54  
55  
56  
57  
58  
59  
60

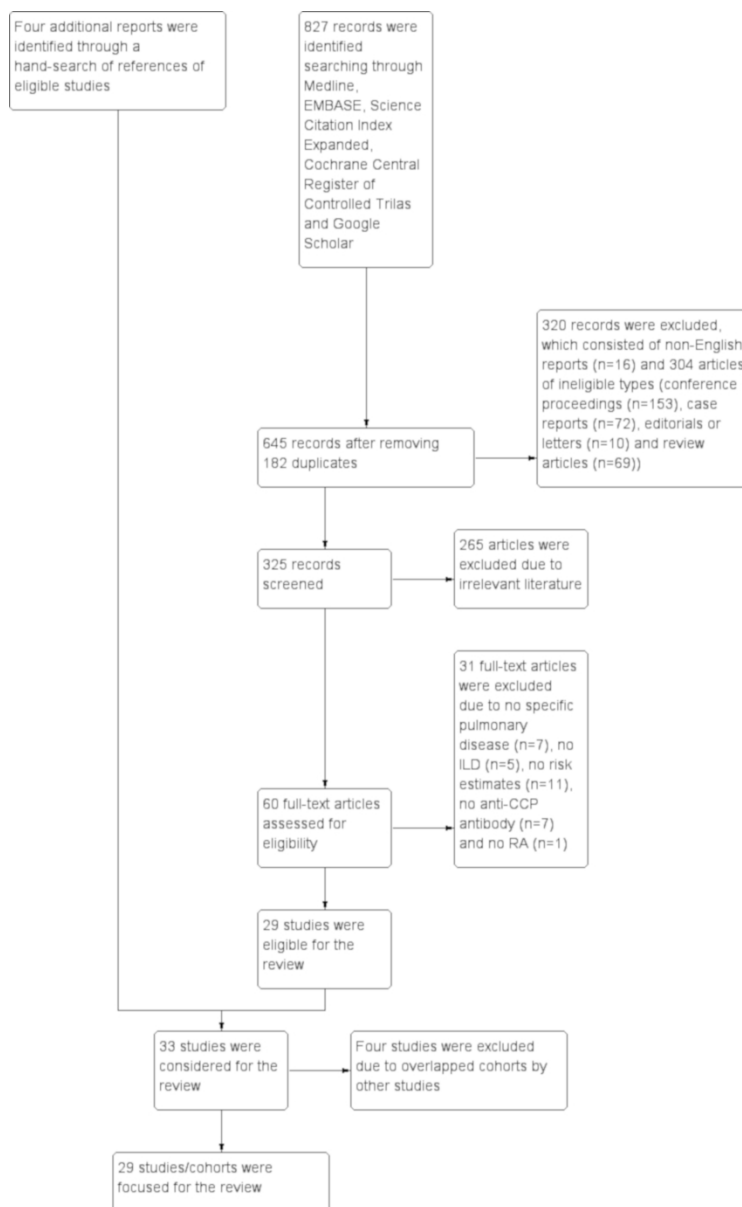

Figure 1

102x165mm (600 x 600 DPI)

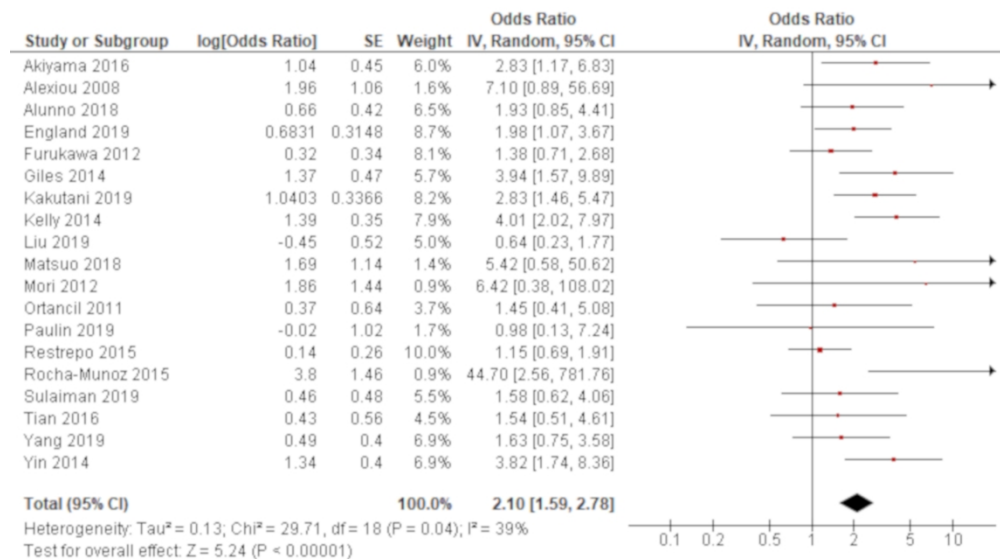

Figure 2

174x99mm (600 x 600 DPI)

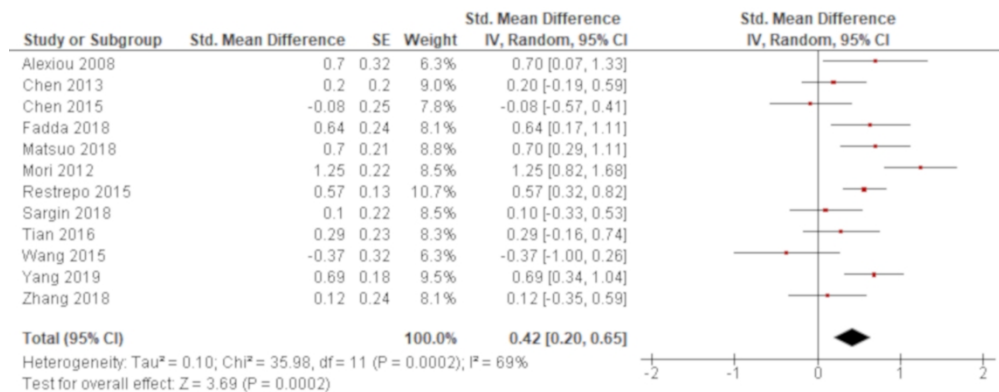

Figure 3

206x83mm (1100 x 1100 DPI)

## Supplementary file

e-Table 1 Other baseline characteristics of included studies

| Study                 | RA diagnostic criteria | ILD diagnostic criteria                                                                                                      | Treatment received <sup>a</sup>                                     |
|-----------------------|------------------------|------------------------------------------------------------------------------------------------------------------------------|---------------------------------------------------------------------|
| Alunno 2018 [38]      | ACR/EULAR 2010         | X-ray and HRCT in symptomatic cases                                                                                          | -                                                                   |
| England 2019 [39]     | ACR 1987               | 1)Pulmonologist diagnosis and imaging,<br>2)non-pulmonologist diagnosis and two of the followings; imaging, pathology or PFT | PSL 63.0% vs. 42.8%, MTX 21.0% vs. 51.2%, Biologics 30.0% vs. 20.1% |
| Giles 2014 [40]       | ACR 1987               | Cardiac MDCT                                                                                                                 | PSL 51% vs. 32%, MTX 58% vs. 68%, TNF- $\alpha$ I 56% vs. 40%       |
| Chen 2013 [41]        | ACR 1987               | HRCT                                                                                                                         | -                                                                   |
| Chen 2015 [42]        | ACR 1987               | HRCT                                                                                                                         | PSL 57% vs. 68%, MTX 63% vs. 67%, TNF- $\alpha$ I 18% vs. 9%        |
| Doyle 2015 [43]       | -                      | HRCT                                                                                                                         | PSL 93.5% vs. 83%, MTX 78.5% vs. 76%, TNF- $\alpha$ I 73.5% vs. 55% |
| Abdel-Hamid 2019 [44] | ACR/EULAR 2010         | HRCT                                                                                                                         | -                                                                   |
| Akiyama 2016 [45]     | ACR/EULAR 2010         | HRCT in symptomatic cases or abnormal radiograph                                                                             | PSL 51.3% vs. 33.1%, MTX 24.4% vs. 61.8%, Biologics 50.0% vs. 43.2% |
| Alixiou 2008 [46]     | -                      | -                                                                                                                            | -                                                                   |
| Correia 2019 [47]     | ACR/EULAR 2010         | CT or radiograph and DLCO or pulmonologist                                                                                   | -                                                                   |

|                       |                            |                                      | diagnosis |                                                                                |
|-----------------------|----------------------------|--------------------------------------|-----------|--------------------------------------------------------------------------------|
| Fadda 2018 [48]       | ACR/EULAR 2010             | HRCT                                 |           | MTX 6.9±4.2 vs. 7.9±4.3 years (duration)                                       |
| Furukawa 2012 [49]    | ACR 1987                   | Radiograph or CT                     |           | -                                                                              |
| Kakutani 2019 [50]    | ACR 1987<br>ACR/EULAR 2010 | HRCT                                 |           | PSL 77.8% vs. 58.1%, MTX 44.4% vs. 66.5%, non- TNF-αI Biologics 10.7% vs. 4.8% |
| Kelly 2014 [51]       | ACR/EULAR 2010             | HRCT                                 |           | -                                                                              |
| Liu 2019 [52]         | ACR 1987                   | -                                    |           | -                                                                              |
| Matsuo 2018 [53]      | -                          | CT in abnormal radiograph            |           | PSL 65.4% vs. 41.6%, MTX 57.7% vs. 72.7%, Biologics 19.2% vs. 30.4%            |
| Mori 2012 [54]        | ACR 1987                   | HRCT                                 |           | MTX 12.5% vs. 12.8%, TNF-αI 0% vs. 0.2%                                        |
| Ortancil 2011 [55]    | ACR 1987                   | -                                    |           | -                                                                              |
| Park 2016 [56]        | ACR/EULAR 2010             | CT                                   |           | -                                                                              |
| Paulin 2019 [57]      | ACR/EULAR 2010             | HRCT                                 |           | MTX 51.9% vs. 74.2%, TNF-αI 11.5% vs. 24.2%                                    |
| Restrepo 2015 [58]    | ACR 1987                   | Clinical, PFT, imaging and pathology |           | PSL 63.7% vs. 46.5%, MTX 50.7% vs. 60.7%, TNF-αI 4.3% vs. 2.7%                 |
| Rocha-Munoz 2015 [59] | ACR 1987                   | Symptoms, PFT and HRCT               |           | PSL 94.9% vs. 88.1%, MTX 100.0% vs. 97.6%                                      |
| Sargin 2018 [60]      | ACR/EULAR 2010             | Symptoms, PFT, X-ray and HRCT        |           | -                                                                              |
| Sulaiman 2019         | ACR/EULAR 2010             | Radiograph and HRCT in               |           | -                                                                              |

|                 |                |  |                                         |                                                                    |
|-----------------|----------------|--|-----------------------------------------|--------------------------------------------------------------------|
| [61]            |                |  | positive clinical exam                  |                                                                    |
| Tian 2016 [62]  | ACR/EULAR 2010 |  | Clinical, PFT, imaging and/or pathology | -                                                                  |
| Wang 2015 [63]  | ACR 1987       |  | HRCT                                    | PSL 68.0% vs. 81.3%, MTX 64.0% vs. 81.3%                           |
| Yang 2019 [64]  | ACR 1987       |  | Clinical, PFT, imaging and/or pathology | MTX 39.0% vs. 76.2%, TNF- $\alpha$ I 5.2% vs. 5.2%                 |
| Yin 2014 [65]   | ACR 1987       |  | HRCT                                    | PSL 81.7% vs. 82.2%, MTX 53.5% vs. 66.4%, Biologics 8.5% vs. 15.0% |
| Zhang 2018 [66] | -              |  | -                                       | -                                                                  |

a, Comparisons correspond to RA-ILD vs. RA without ILD;

ACR, American College of Rheumatology; DLCO, diffusing capacity of the lung for carbon monoxide; EULAR, European League Against Rheumatism; HRCT, high resolution computed tomography; ILD, interstitial lung disease; MDCT, multi-detector computed tomography; MTX, methotrexate, PFT, pulmonary function test; PSL, prednisolone; RA, rheumatoid arthritis; TNF- $\alpha$ I, tumor necrosis factor- $\alpha$  inhibitor;

e-Table 2 Meta-regression analysis<sup>a</sup>

| Potential confounder                                                                  | Positivity of anti-CCP antibody |                           | Titre of anti-CCP antibody  |                           |
|---------------------------------------------------------------------------------------|---------------------------------|---------------------------|-----------------------------|---------------------------|
|                                                                                       | Univariate                      | Multivariate <sup>b</sup> | Univariate                  | Multivariate <sup>b</sup> |
| Age (at inclusion) (/year)                                                            | 0.02 (-0.04-0.07)               | 0.06 (-0.03-0.16)         | -0.01 (-0.08-0.06)          | -0.01 (-0.09-0.06)        |
| Gender (male) (/percentage)                                                           | 0.003 (-0.009-0.02)             | 0.003 (-0.009-0.02)       | <b>-0.02 (-0.04--0.004)</b> | 0.004 (-0.04-0.05)        |
| Smoking history (/percentage)                                                         | -0.008 (-0.02-0.005)            | -0.0005 (-0.03-0.02)      | 0.001 (-0.01-0.01)          | 0.0008 (-0.006-0.008)     |
| RA duration (/year)                                                                   | 0.02 (-0.19-0.23)               | 0.03 (-0.20-0.26)         | <b>0.05 (0.01-0.09)</b>     | 0.06 (-0.03-0.14)         |
| RA diagnostic criteria (ACR/EULAR 2010 vs. ACR 1987)                                  | 0.36 (-0.22-0.94)               | 0.47 (-0.25-1.18)         | -0.17 (-0.94-0.59)          | 0.06 (-1.24-1.36)         |
| ILD diagnostic criteria (CT for all subjects vs. others)                              | 0.02 (-0.60-0.64)               | -0.48 (-1.66-0.71)        | -0.24 (-1.26-0.78)          | 0.20 (-0.21-0.61)         |
| Proportion of positivity of anti-CCP antibody in subjects with RA alone (/percentage) | 0.009 (-0.01-0.03)              | 0.02 (-0.02-0.06)         | 0.01 (-0.01-0.04)           | - <sup>c</sup>            |

Text in bold indicates statistical significance;

a, The effect of the association of positivity and titres of anti-CCP antibody with RA-ILD was regressed against each potential confounder;



1  
2  
3  
4  
5 b, Each potential confounder was adjusted for RA duration and the effect of RA duration was estimated allowing for gender;  
6

7 c, The effect was unable to be estimated due to a small number of studies;  
8

9 ACR, American College of Rheumatology; CCP, cyclic citrullinated peptide; EULAR, European League Against Rheumatism; ILD,  
10 interstitial lung disease; HRCT, high resolution computed tomography; RA, rheumatoid arthritis;  
11  
12  
13  
14  
15  
16  
17  
18  
19  
20  
21  
22  
23  
24  
25  
26  
27  
28  
29  
30  
31  
32  
33  
34  
35  
36  
37  
38  
39  
40  
41  
42  
43  
44  
45  
46

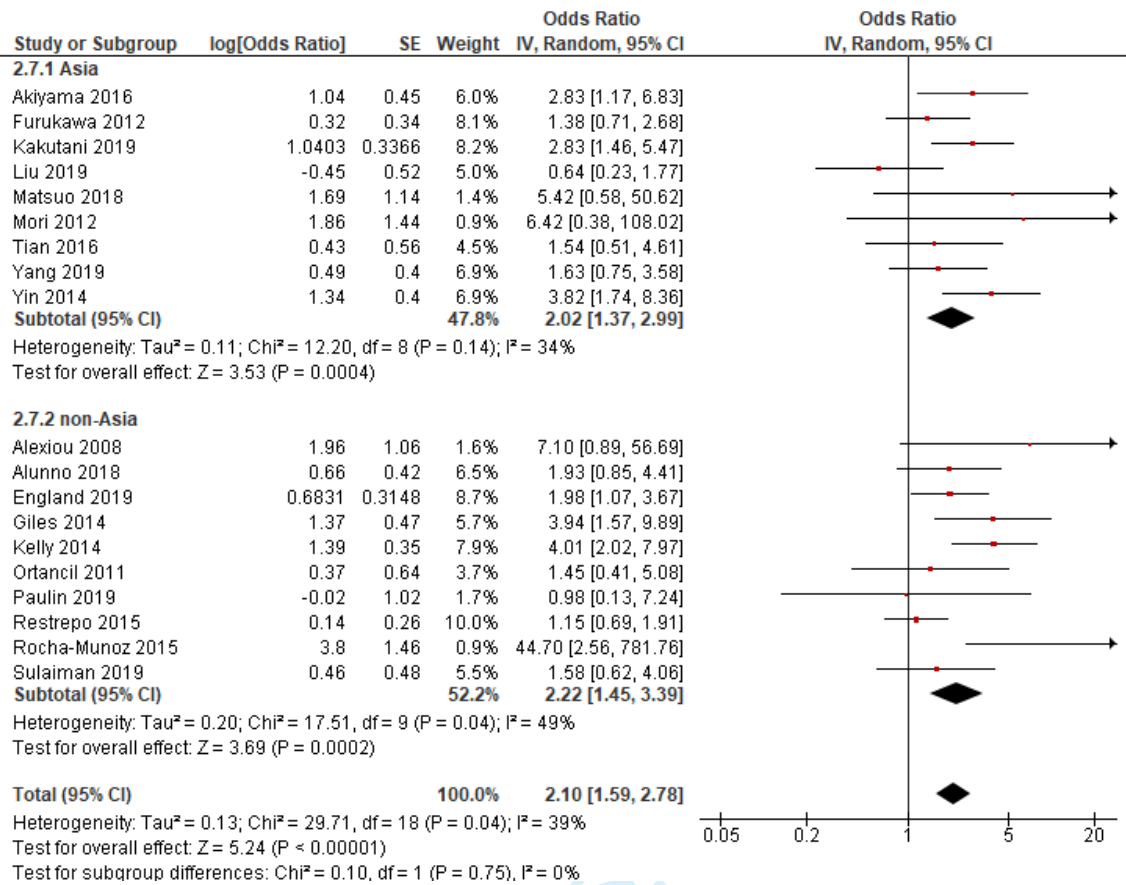

e-Figure 1 Subgroup analysis of the association of the positivity of anti-citrullinated peptide (CCP) antibody with rheumatoid arthritis-associated interstitial lung disease (RA-ILD) based on study location

A pooled analysis of studies in Asia and non-Asia individually demonstrated that the positivity of anti-CCP antibody was significantly associated with RA-ILD with odds ratios (ORs) of 2.02 (95% confidence interval (CI): 1.37-2.99, p=0.0004/95% prediction interval (PI): 0.81-5.05) and 2.22 (95% CI: 1.45-3.39, p=0.0002/95%PI: 0.71-6.98), respectively and there was no significant difference in these results (p=0.75). There remained moderate heterogeneity in both Asian and non-Asian studies.

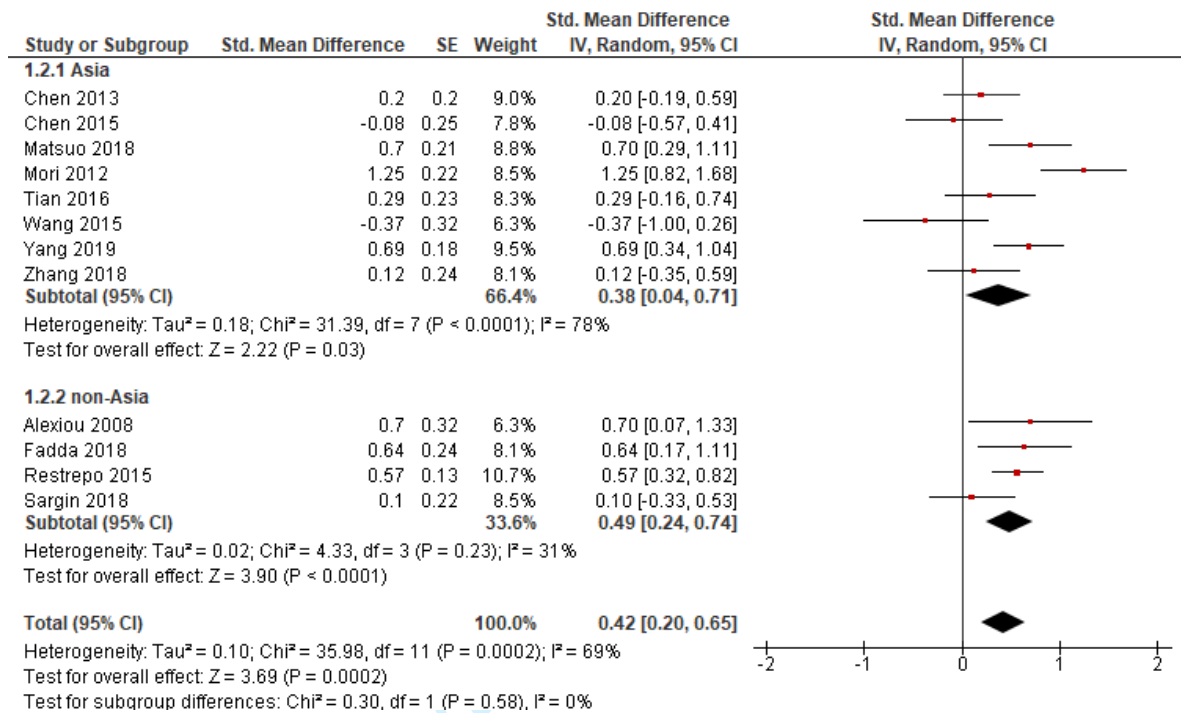

e-Figure 2 Subgroup analysis of the association of the titre of anti-citrullinated peptide (CCP) antibody with rheumatoid arthritis-associated interstitial lung disease (RA-ILD) based on study location

A pooled analysis of studies in Asia and non-Asia individually demonstrated that the titre of anti-CCP antibody was significantly higher for RA-ILD than RA without ILD with standardized mean differences (SMDs) of 0.38 (95% confidence interval (CI): 0.04-0.71,  $p=0.03$ /95% prediction interval (PI): -0.74-1.50) and 0.49 (95%CI: 0.24-0.74,  $p<0.0001$ /95%PI: -0.33-1.31), respectively and there was no significant difference in these results ( $p=0.58$ ). There remained substantial heterogeneity in Asian studies ( $\chi^2=31.4$ ,  $p<0.0001$ ,  $I^2=78\%$ ).

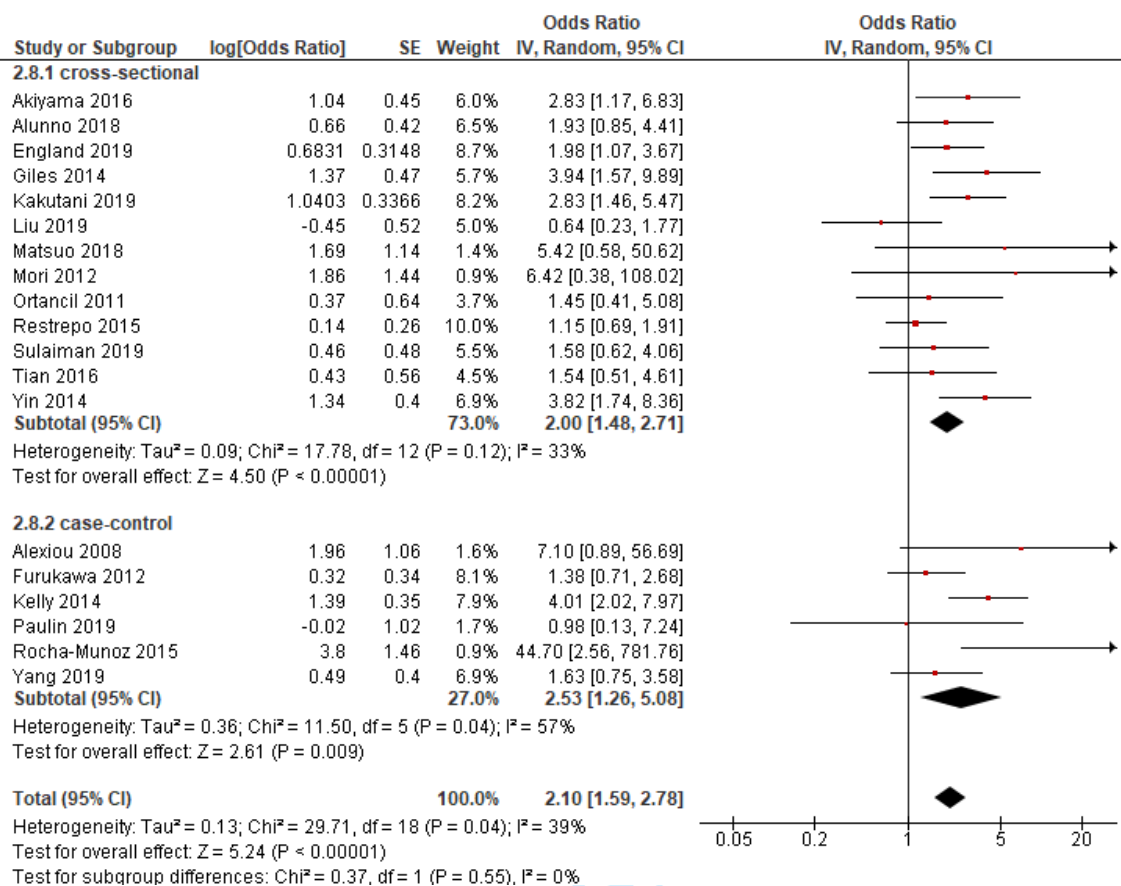

e-Figure 3 Subgroup analysis of the association of the positivity of anti-citrullinated peptide (CCP) antibody with rheumatoid arthritis-associated interstitial lung disease (RA-ILD) based on study design

A pooled analysis of cross-sectional and case-control studies individually demonstrated that the positivity of anti-CCP antibody was significantly associated with RA-ILD with odds ratios (ORs) of 2.00 (95% confidence interval (CI): 1.48-2.71,  $p < 0.00001$ /95% prediction interval (PI): 0.95-4.21) and 2.53 (95% CI: 1.26-5.08,  $p = 0.009$ /95% PI: 0.36-17.5), respectively and there was no significant difference in these results ( $p = 0.55$ ). There remained considerable heterogeneity in case-control studies ( $\chi^2 = 11.5$ ,  $p = 0.04$ ,  $I^2 = 57\%$ ).

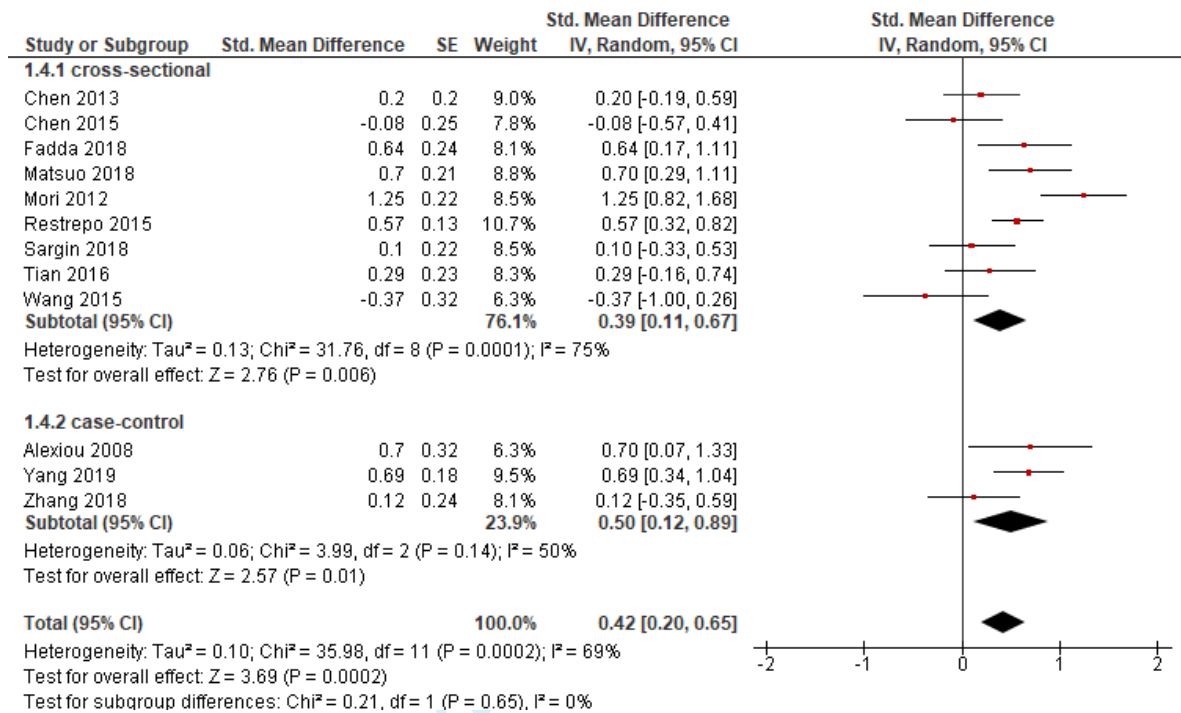

e-Figure 4 Subgroup analysis of the association of the titre of anti-citrullinated peptide (CCP) antibody with rheumatoid arthritis-associated interstitial lung disease (RA-ILD) based on study design

A pooled analysis of cross-sectional and case-control studies individually demonstrated that the titre of anti-CCP antibody was significantly higher for RA-ILD than RA without ILD with standardized mean differences (SMDs) of 0.39 (95% confidence interval (CI): 0.11-0.67,  $p=0.006$ /95% prediction interval (PI): -0.53-1.31) and 0.50 (95%CI: 0.12-0.89,  $p=0.01$ /95%PI: -3.51-4.51), respectively and there was no significant difference in these results ( $p=0.65$ ). There remained substantial heterogeneity in cross-sectional studies ( $\chi^2=31.8$ ,  $p=0.0001$ ,  $I^2=75\%$ ).

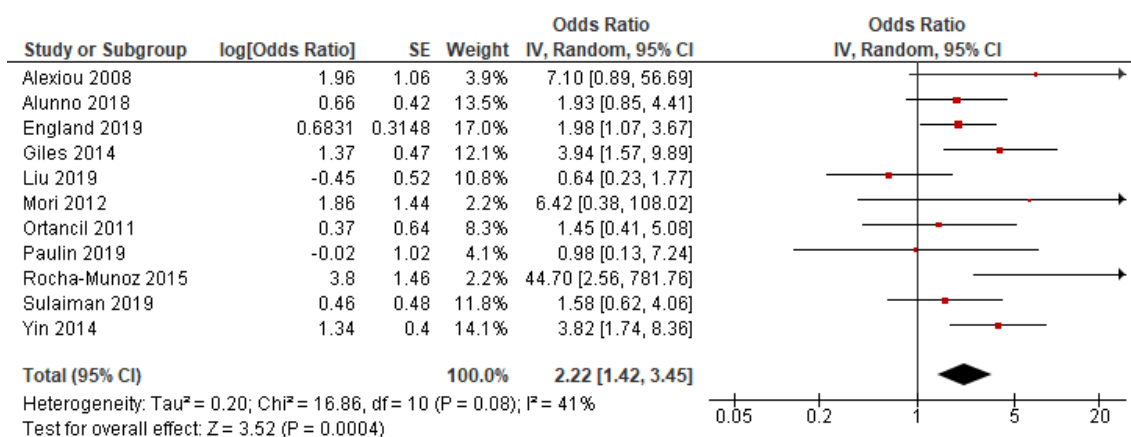

e-Figure 5 Sensitivity analysis of the association of the positivity of anti-citrullinated peptide (CCP) antibody with rheumatoid arthritis-associated interstitial lung disease (RA-ILD) focusing on the same generation of the autoantibody test

The results of univariate analyses in 11 studies that examined the second generation of anti-CCP antibody were pooled for meta-analysis. The positivity of anti-CCP antibody was significantly associated with RA-ILD with an odds ratio (OR) of 2.22 (95% confidence interval: 1.42-3.45, p=0.00041/95% prediction interval: 0.72-6.89). There remained moderate heterogeneity (chi<sup>2</sup>=16.9, p=0.08, I<sup>2</sup>=41%).

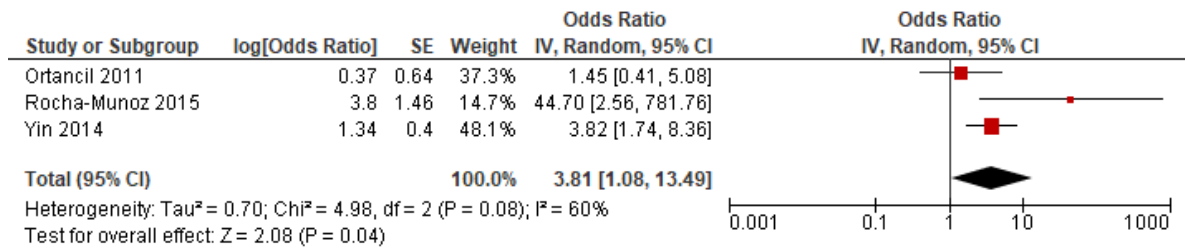

e-Figure 6 Sensitivity analysis of the association of the positivity of anti-citrullinated peptide (CCP) antibody with rheumatoid arthritis-associated interstitial lung disease (RA-ILD) focusing on the same generation of the autoantibody test by the same manufacturer

The results of univariate analyses in three studies that examined the second generation of anti-CCP antibody test by the same manufacturer (Euroimmun, Lübeck, Germany) were pooled for meta-analysis. The positivity of anti-CCP antibody was significantly associated with RA-ILD with an odds ratio (OR) of 3.81 (95% confidence interval: 1.08-13.5,  $p=0.04$ /95% prediction interval: 0.00->100.0). There remained considerable heterogeneity ( $\chi^2=4.98$ ,  $p=0.08$ ,  $I^2=60\%$ ).

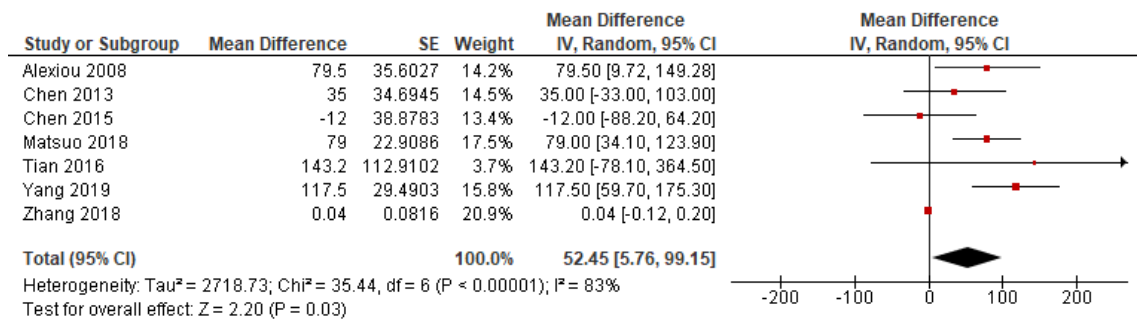

e-Figure 7 Sensitivity analysis of the association of the titre of anti-citrullinated peptide (CCP) antibody with rheumatoid arthritis-associated interstitial lung disease (RA-ILD) focusing on the same summary statistics

A pooled analysis of seven studies where mean differences (MDs) were available without a conversion of summary statistics demonstrated that higher titres of anti-CCP antibody was significantly associated with RA-ILD with an MD of 52.5 (95% confidence interval: 5.76-99.2, p=0.03/95% prediction interval: -94.9-199.9). There remained substantial heterogeneity (chi<sup>2</sup>=35.4, p<0.00001, I<sup>2</sup>=83%).



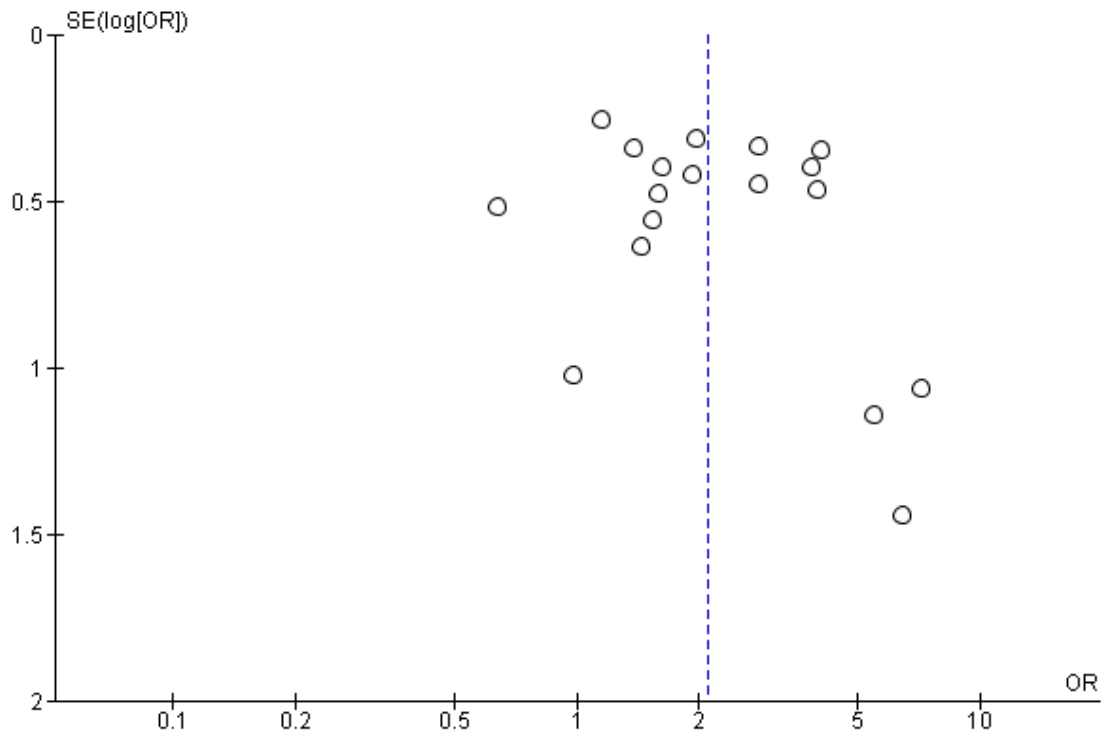

e-Figure 8 Funnel plot of the effect of the positivity of anti-citrullinated peptide (CCP) antibody against its standard error

The graphical inspection demonstrated no apparent asymmetry.



e-Figure 9 Funnel plot of the effect of the titre of anti-citrullinated peptide (CCP) antibody against its standard error

The graphical inspection demonstrated no apparent asymmetry.

## e-Appendix

## Search terms for each electronic database

## Medline (Ovid) (1946 through 12 November 2019)

- 1 exp Arthritis, Rheumatoid/ (110375)
- 2 ((rheumatoid or reumatoid or revmatoid or rheumatic or reumatic or revmatic or  
rheumat\$ or reumat\$ or revmarthrit\$) adj3 (arthrit\$ or artrit\$ or diseas\$ or condition\$ or  
nodule\$)).mp. (60240)
- 3 exp Lung Diseases, Interstitial/ (57554)
- 4 exp Pulmonary Fibrosis/ (21497)
- 5 (interstitial adj3 lung adj3 disease\$).mp. (14632)
- 6 (interstitial adj3 pneumoni\$).mp. (10671)
- 7 alveolitis.mp. (6068)
- 8 (pulmonary adj3 fibros\$).mp. (29467)
- 9 exp Anti-Citrullinated Protein Antibodies/ (211)
- 10 cyclic citrullinated protein antibod\$.mp. (28)
- 11 cyclic citrullinated peptide antibod\$.mp. (664)
- 12 citrullinated protein antibod\$.mp. (798)
- 13 citrullinated peptide antibod\$.mp. (1001)
- 14 anti-CCP.mp. (1527)
- 15 ACPA.mp. (1369)
- 16 1 or 2 (157282)
- 17 3 or 4 or 5 or 6 or 7 or 8 (88395)

- 1
- 2
- 3
- 4
- 5
- 6 18 9 or 10 or 11 or 12 or 13 or 14 or 15 (3452)
- 7
- 8 19 16 and 17 and 18 (64)
- 9
- 10
- 11
- 12
- 13
- 14
- 15
- 16
- 17
- 18
- 19
- 20
- 21
- 22
- 23
- 24
- 25
- 26
- 27
- 28
- 29
- 30
- 31
- 32
- 33
- 34
- 35
- 36
- 37
- 38
- 39
- 40
- 41
- 42
- 43
- 44
- 45
- 46
- 47
- 48
- 49
- 50
- 51
- 52
- 53
- 54
- 55
- 56
- 57
- 58
- 59
- 60

For peer review only

EMBASE (Ovid) (1947 through 12 November 2019)

- 1 exp rheumatoid arthritis/ (218675)
- 2 ((rheumatoid or reumatoid or revmatoid or rheumatic or reumatic or revmatic or  
3 rheumat\$ or reumat\$ or revmarthrit\$) adj3 (arthrit\$or artrit\$ or diseas\$ or condition\$ or  
4 nodule\$)).mp. (106635)
- 5 exp interstitial lung disease/ (82134)
- 6 exp lung fibrosis/ (81580)
- 7 (interstitial adj3 lung adj3 disease\$.mp. (25821)
- 8 (interstitial adj3 pneumoni\$.mp. (22196)
- 9 alveolitis.mp. (29356)
- 10 (pulmonary adj3 fibros\$.mp. (32054)
- 11 exp cyclic citrullinated peptide antibody/ (6135)
- 12 cyclic citrullinated protein antibod\$.mp. (78)
- 13 cyclic citrullinated peptide antibod\$.mp. (6299)
- 14 citrullinated protein antibod\$.mp. (1603)
- 15 citrullinated peptide antibod\$.mp. (6704)
- 16 anti-CCP.mp. (4537)
- 17 ACPA.mp. (4424)
- 18 1 or 2 (285679)
- 19 3 or 4 or 5 or 6 or 7 or 8 (139209)
- 20 9 or 10 or 11 or 12 or 13 or 14 or 15 (11794)
- 21 16 and 17 and 18 (452)

1  
2  
3  
4  
5  
6 Science Citation Index Expanded (Clarivate Analytics) (1900 through 12 November  
7 2019)

8  
9  
10 #1 TS=(rheumatoid NEAR/3 arthritis or rheumatoid NEAR/3 disease\$ or rheumatoid  
11 NEAR/3 condition\$) (165,017)

12  
13  
14 #2 TS=("interstitial NEAR/3 lung NEAR/3 disease\$") OR TS=("interstitial NEAR/3  
15 pneumoni\*") OR TS=(alveolitis) OR TS=("pulmonary NEAR/3 fibros\*") (4,751)

16  
17  
18 #3 TS=(anti cyclic citrullinated protein antibod\* or anti cyclic citrullinated peptide  
19 antibod\* or anti citrullinated protein antibod\* or anti citrullinated peptide antibod\* or  
20 anti CCP or ACPA) (4,483)

21  
22  
23  
24 #3 #4 AND #5 AND #6 (2)

1  
2  
3  
4  
5  
6 Cochrane Central Register of Controlled Trials (Cochrane Library) (accessed on the 12<sup>th</sup>  
7 of November 2019)  
8

9  
10 #1 MeSH descriptor: [Arthritis, Rheumatoid] explode all trees (5530)  
11

12 #2 ((rheumatoid or reumatoid or revmatoid or rheumatic or reumatic or revmatic or  
13 rheumat\* or reumat\* or revmarthrit\*) near/3(arthrit\* or artrit\* or diseas\* or condition\*  
14 or nodule\*)):ti,ab,kw (17434)  
15  
16

17  
18 #3 MeSH descriptor: [Lung Diseases, Interstitial] explode all trees (738)  
19

20 #4 MeSH descriptor: [Pulmonary Fibrosis] explode all trees (429)  
21  
22

23 #5 interstitial near/3 lung near/3 disease\*:ti,ab,kw (1017)  
24

25 #6 interstitial near/3 pneumoni\*:ti,ab,kw (619)  
26

27 #7 alveolitis:ti,ab,kw (732)  
28

29 #8 pulmonary near/3 fibros\*:ti,ab,kw (1440)  
30  
31

32 #9 MeSH descriptor: [Anti-Citrullinated Protein Antibodies] explode all trees (6)  
33  
34

35 #10 (cyclic citrullinated protein antibod\*):ti,ab,kw (105)  
36

37 #11 (cyclic citrullinated peptide antibod\*):ti,ab,kw (178)  
38

39 #12 (citrullinated protein antibod\*):ti,ab,kw (199)  
40

41 #13 (citrullinated peptide antibod\*):ti,ab,kw (225)  
42  
43

44 #14 anti-CCP:ti,ab,kw (335)  
45

46 #15 ACPA:ti,ab,kw (292)  
47  
48

49 #16 OR #2 (17673)  
50

51 #17 #3 OR #4 OR #5 OR #6 OR #7 OR #8 (3148)  
52

53 #18 #9 OR #10 OR #11 OR #12 OR #13 OR #14 OR #15 (728)  
54  
55

56 #19 #16 AND #17 AND #18 (9)  
57  
58  
59  
60

1  
2  
3  
4  
5  
6 Google Scholar (accessed on the 12<sup>th</sup> of November 2019)  
7

8 (“rheumatoid arthritis” OR “rheumatoid disease”) (“interstitial lung disease” OR  
9 “interstitial pneumonia” OR “pulmonary fibrosis”) (“anti cyclic citrullinated protein  
10 antibody” OR “anti cyclic citrullinated peptide antibody” OR “anti citrullinated protein  
11 antibody” OR “anti citrullinated peptide antibody”)  
12  
13  
14  
15  
16  
17  
18  
19  
20  
21  
22  
23  
24  
25  
26  
27  
28  
29  
30  
31  
32  
33  
34  
35  
36  
37  
38  
39  
40  
41  
42  
43  
44  
45  
46  
47  
48  
49  
50  
51  
52  
53  
54  
55  
56  
57  
58  
59  
60

For peer review only



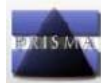

# PRISMA 2009 Checklist

1  
2  
3  
4  
5  
6  
7  
8  
9  
10  
11  
12  
13  
14  
15  
16  
17  
18  
19  
20  
21  
22  
23  
24  
25  
26  
27  
28  
29  
30  
31  
32  
33  
34  
35  
36  
37  
38  
39  
40  
41  
42  
43  
44  
45  
46  
47

| Section/topic                      | #  | Checklist item                                                                                                                                                                                                                                                                                              | Reported on page # |
|------------------------------------|----|-------------------------------------------------------------------------------------------------------------------------------------------------------------------------------------------------------------------------------------------------------------------------------------------------------------|--------------------|
| <b>TITLE</b>                       |    |                                                                                                                                                                                                                                                                                                             |                    |
| Title                              | 1  | Identify the report as a systematic review, meta-analysis, or both.                                                                                                                                                                                                                                         | Page 1             |
| <b>ABSTRACT</b>                    |    |                                                                                                                                                                                                                                                                                                             |                    |
| Structured summary                 | 2  | Provide a structured summary including, as applicable: background; objectives; data sources; study eligibility criteria, participants, and interventions; study appraisal and synthesis methods; results; limitations; conclusions and implications of key findings; systematic review registration number. | Page 3-4           |
| <b>INTRODUCTION</b>                |    |                                                                                                                                                                                                                                                                                                             |                    |
| Rationale                          | 3  | Describe the rationale for the review in the context of what is already known.                                                                                                                                                                                                                              | Page 5-6           |
| Objectives                         | 4  | Provide an explicit statement of questions being addressed with reference to participants, interventions, comparisons, outcomes, and study design (PICOS).                                                                                                                                                  | Page 6             |
| <b>METHODS</b>                     |    |                                                                                                                                                                                                                                                                                                             |                    |
| Protocol and registration          | 5  | Indicate if a review protocol exists, if and where it can be accessed (e.g., Web address), and, if available, provide registration information including registration number.                                                                                                                               | Not applicable     |
| Eligibility criteria               | 6  | Specify study characteristics (e.g., PICOS, length of follow-up) and report characteristics (e.g., years considered, language, publication status) used as criteria for eligibility, giving rationale.                                                                                                      | Page 6-7           |
| Information sources                | 7  | Describe all information sources (e.g., databases with dates of coverage, contact with study authors to identify additional studies) in the search and date last searched.                                                                                                                                  | Page 7             |
| Search                             | 8  | Present full electronic search strategy for at least one database, including any limits used, such that it could be repeated.                                                                                                                                                                               | Page 7-8           |
| Study selection                    | 9  | State the process for selecting studies (i.e., screening, eligibility, included in systematic review, and, if applicable, included in the meta-analysis).                                                                                                                                                   | Page 8             |
| Data collection process            | 10 | Describe method of data extraction from reports (e.g., piloted forms, independently, in duplicate) and any processes for obtaining and confirming data from investigators.                                                                                                                                  | Page 8             |
| Data items                         | 11 | List and define all variables for which data were sought (e.g., PICOS, funding sources) and any assumptions and simplifications made.                                                                                                                                                                       | Page 8             |
| Risk of bias in individual studies | 12 | Describe methods used for assessing risk of bias of individual studies (including specification of whether this was done at the study or outcome level), and how this information is to be used in any data synthesis.                                                                                      | Page 8-9           |
| Summary measures                   | 13 | State the principal summary measures (e.g., risk ratio, difference in means).                                                                                                                                                                                                                               | Page 9             |
| Synthesis of results               | 14 | Describe the methods of handling data and combining results of studies, if done, including measures of consistency (e.g., I <sup>2</sup> for each meta-analysis). <a href="http://bmjopen.bmj.com/site/about/guidelines.xhtml">http://bmjopen.bmj.com/site/about/guidelines.xhtml</a>                       | Page 9-10          |



# PRISMA 2009 Checklist

Page 1 of 2

| Section/topic                 | #  | Checklist item                                                                                                                                                                                           | Reported on page # |
|-------------------------------|----|----------------------------------------------------------------------------------------------------------------------------------------------------------------------------------------------------------|--------------------|
| Risk of bias across studies   | 15 | Specify any assessment of risk of bias that may affect the cumulative evidence (e.g., publication bias, selective reporting within studies).                                                             | Page 11            |
| Additional analyses           | 16 | Describe methods of additional analyses (e.g., sensitivity or subgroup analyses, meta-regression), if done, indicating which were pre-specified.                                                         | Page 10-11         |
| <b>RESULTS</b>                |    |                                                                                                                                                                                                          |                    |
| Study selection               | 17 | Give numbers of studies screened, assessed for eligibility, and included in the review, with reasons for exclusions at each stage, ideally with a flow diagram.                                          | Page 11-12         |
| Study characteristics         | 18 | For each study, present characteristics for which data were extracted (e.g., study size, PICOS, follow-up period) and provide the citations.                                                             | Page 11-13         |
| Risk of bias within studies   | 19 | Present data on risk of bias of each study and, if available, any outcome level assessment (see item 12).                                                                                                | Page 13            |
| Results of individual studies | 20 | For all outcomes considered (benefits or harms), present, for each study: (a) simple summary data for each intervention group (b) effect estimates and confidence intervals, ideally with a forest plot. | Page 13-15         |
| Synthesis of results          | 21 | Present results of each meta-analysis done, including confidence intervals and measures of consistency.                                                                                                  | Page 13-14         |
| Risk of bias across studies   | 22 | Present results of any assessment of risk of bias across studies (see Item 15).                                                                                                                          | Page 16            |
| Additional analysis           | 23 | Give results of additional analyses, if done (e.g., sensitivity or subgroup analyses, meta-regression [see Item 16]).                                                                                    | Page 15-16         |
| <b>DISCUSSION</b>             |    |                                                                                                                                                                                                          |                    |
| Summary of evidence           | 24 | Summarize the main findings including the strength of evidence for each main outcome; consider their relevance to key groups (e.g., healthcare providers, users, and policy makers).                     | Page 17            |
| Limitations                   | 25 | Discuss limitations at study and outcome level (e.g., risk of bias), and at review-level (e.g., incomplete retrieval of identified research, reporting bias).                                            | Page 20-21         |
| Conclusions                   | 26 | Provide a general interpretation of the results in the context of other evidence, and implications for future research.                                                                                  | Page 21-22         |
| <b>FUNDING</b>                |    |                                                                                                                                                                                                          |                    |
| Funding                       | 27 | Describe sources of funding for the systematic review and other support (e.g., supply of data); role of funders for the systematic review.                                                               | Page 22            |

From: Moher D, Liberati A, Tetzlaff J, Altman DG, The PRISMA Group (2009). Preferred Reporting Items for Systematic Reviews and Meta-Analyses: The PRISMA Statement. PLoS Med 6(6): e1000097. doi:10.1371/journal.pmed1000097

1  
2  
3  
4  
5  
6  
7  
8  
9  
10  
11  
12  
13  
14  
15  
16  
17  
18  
19  
20  
21  
22  
23  
24  
25  
26  
27  
28  
29  
30  
31  
32  
33  
34  
35  
36  
37  
38  
39  
40  
41  
42  
43  
44  
45  
46

| Checklist items for Meta-analyses of Observational Studies in Epidemiology (MOOSE)                           | Reported      |
|--------------------------------------------------------------------------------------------------------------|---------------|
|                                                                                                              | on Page       |
| Reporting of background should include                                                                       |               |
| • Problem definition                                                                                         | Page 5-6      |
| • Hypothesis statement                                                                                       | Not described |
| • Description of study outcome(s)                                                                            | Page 7        |
| • Type of exposure or intervention used                                                                      | Page 7        |
| • Type of study designs used                                                                                 | Page 7        |
| • Study population                                                                                           | Page 6-7      |
| Reporting of search strategy should include                                                                  |               |
| • Qualifications of searchers (eg, librarians and investigators)                                             | Not described |
| • Search strategy, including time period included in the synthesis and keywords                              | Page 7-8      |
| • Effort to include all available studies, including contact with authors                                    | Page 8        |
| • Databases and registries searched                                                                          | Page 7        |
| • Search software used, name and version, including special features used (eg, explosion)                    | Not described |
| • Use of hand searching (eg, reference lists of obtained articles)                                           | Page 8        |
| • List of citations located and those excluded, including justification                                      | Figure 1      |
| • Method of addressing articles published in languages other than English                                    | Page 7        |
| • Method of handling abstracts and unpublished studies                                                       | Page 7        |
| • Description of any contact with authors                                                                    | Not described |
| Reporting of methods should include                                                                          |               |
| • Description of relevance or appropriateness of studies assembled for assessing the hypothesis to be tested | Not described |
| • Rationale for the selection and coding of data (eg, sound clinical principles or convenience)              | Not described |

|                                                                                                                                                                                                                                                                                |                                  |
|--------------------------------------------------------------------------------------------------------------------------------------------------------------------------------------------------------------------------------------------------------------------------------|----------------------------------|
| • Documentation of how data were classified and coded (eg, multiple raters, blinding, and interrater reliability)                                                                                                                                                              | Not described                    |
| • Assessment of confounding (eg, comparability of cases and controls in studies where appropriate)                                                                                                                                                                             | Not described                    |
| • Assessment of study quality, including blinding of quality assessors; stratification or regression on possible predictors of study results                                                                                                                                   | Page 8-9                         |
| • Assessment of heterogeneity                                                                                                                                                                                                                                                  | Page 10-11                       |
| • Description of statistical methods (eg, complete description of fixed or random effects models, justification of whether the chosen models account for predictors of study results, dose-response models, or cumulative meta-analysis) in sufficient detail to be replicated | Page 9-10                        |
| • Provision of appropriate tables and graphics                                                                                                                                                                                                                                 | Figure 1<br>(study flow diagram) |
| Reporting of results should include                                                                                                                                                                                                                                            |                                  |
| • Graphic summarizing individual study estimates and overall estimate                                                                                                                                                                                                          | Figure 2-3                       |
| • Table giving descriptive information for each study included                                                                                                                                                                                                                 | Table 1, 2                       |
| • Results of sensitivity testing (eg, subgroup analysis)                                                                                                                                                                                                                       | Page 15-16                       |
| • Indication of statistical uncertainty of findings                                                                                                                                                                                                                            | Page 13-15                       |
| Reporting of discussion should include                                                                                                                                                                                                                                         |                                  |
| • Quantitative assessment of bias (eg, publication bias)                                                                                                                                                                                                                       | Page 21                          |
| • Justification of exclusion (eg, exclusion of non-English-language citations)                                                                                                                                                                                                 | Not described                    |
| • Assessment of quality of included studies                                                                                                                                                                                                                                    | Page 21                          |
| Reporting of conclusions should include                                                                                                                                                                                                                                        |                                  |
| • Consideration of alternative explanations for observed results                                                                                                                                                                                                               | Page 22                          |
| • Generalization of the conclusions (ie, appropriate for the data presented and within the domain of the literature review)                                                                                                                                                    | Page 22                          |
| • Guidelines for future research                                                                                                                                                                                                                                               | Page 21                          |
| • Disclosure of funding source                                                                                                                                                                                                                                                 | Page 22                          |

1  
2  
3  
4  
5  
6  
7  
8  
9  
10  
11  
12  
13  
14  
15  
16  
17  
18  
19  
20  
21  
22  
23  
24  
25  
26  
27  
28  
29  
30  
31  
32  
33  
34  
35  
36  
37  
38  
39  
40  
41  
42  
43  
44  
45  
46

From Stroup DF, Berlin JA, Morton SC, et al. Meta-analysis of observational studies in epidemiology: a proposal for reporting. Meta-analysis Of Observational Studies in Epidemiology (MOOSE) group. JAMA 2000;283:2008-12.

For peer review only

# BMJ Open

## A systematic review and meta-analysis of the risk of rheumatoid arthritis-associated interstitial lung disease related to anti-cyclic citrullinated peptide (CCP) antibody

|                                 |                                                                                                                                                              |
|---------------------------------|--------------------------------------------------------------------------------------------------------------------------------------------------------------|
| Journal:                        | <i>BMJ Open</i>                                                                                                                                              |
| Manuscript ID                   | bmjopen-2020-040465.R2                                                                                                                                       |
| Article Type:                   | Original research                                                                                                                                            |
| Date Submitted by the Author:   | 11-Jan-2021                                                                                                                                                  |
| Complete List of Authors:       | Kamiya, Hiroyuki; Tatebayashi Kosei Hospital, Department of Respiratory Medicine<br>Panlaqui, Ogee; Northern Hospital, Department of Intensive Care Medicine |
| <b>Primary Subject Heading</b>: | Respiratory medicine                                                                                                                                         |
| Secondary Subject Heading:      | Evidence based practice                                                                                                                                      |
| Keywords:                       | RHEUMATOLOGY, Thoracic medicine < INTERNAL MEDICINE, Interstitial lung disease < THORACIC MEDICINE                                                           |
|                                 |                                                                                                                                                              |

SCHOLARONE™  
Manuscripts



I, the Submitting Author has the right to grant and does grant on behalf of all authors of the Work (as defined in the below author licence), an exclusive licence and/or a non-exclusive licence for contributions from authors who are: i) UK Crown employees; ii) where BMJ has agreed a CC-BY licence shall apply, and/or iii) in accordance with the terms applicable for US Federal Government officers or employees acting as part of their official duties; on a worldwide, perpetual, irrevocable, royalty-free basis to BMJ Publishing Group Ltd ("BMJ") its licensees and where the relevant Journal is co-owned by BMJ to the co-owners of the Journal, to publish the Work in this journal and any other BMJ products and to exploit all rights, as set out in our [licence](#).

The Submitting Author accepts and understands that any supply made under these terms is made by BMJ to the Submitting Author unless you are acting as an employee on behalf of your employer or a postgraduate student of an affiliated institution which is paying any applicable article publishing charge ("APC") for Open Access articles. Where the Submitting Author wishes to make the Work available on an Open Access basis (and intends to pay the relevant APC), the terms of reuse of such Open Access shall be governed by a Creative Commons licence – details of these licences and which [Creative Commons](#) licence will apply to this Work are set out in our licence referred to above.

Other than as permitted in any relevant BMJ Author's Self Archiving Policies, I confirm this Work has not been accepted for publication elsewhere, is not being considered for publication elsewhere and does not duplicate material already published. I confirm all authors consent to publication of this Work and authorise the granting of this licence.

**Title**

A systematic review and meta-analysis of the risk of rheumatoid arthritis-associated interstitial lung disease related to anti-cyclic citrullinated peptide (CCP) antibody

**Authors**

Hiroyuki Kamiya<sup>1</sup>, Ogee Mer Panlaqui<sup>2</sup>

<sup>1</sup> Department of Respiratory Medicine, Tatebayashi Kosei Hospital, Gunma, Japan

<sup>2</sup> Department of Intensive Care Medicine, Northern Hospital, Melbourne, Australia

**Correspondence**

Hiroyuki Kamiya

Department of Respiratory Medicine, Tatebayashi Kosei Hospital, Gunma, Japan

374-8533

Phone: +81-276-72-3140

Email: mlb04194@nifty.com

**Word count**

4475



## Keywords

Rheumatoid arthritis, interstitial lung disease, anti-cyclic citrullinated peptide antibody, risk, review

## Article Summary

### Strengths and limitations of this study

- This systematic review and meta-analysis addressed the risk of RA-ILD related to both the presence and titres of anti-CCP antibody, which was not clarified in previous literature.
- A substantial variance in the results of primary studies, which may have been derived from the diversity of anti-CCP antibody assays and included subjects, may undermine the generalizability of the findings of this study.
- The usefulness of the findings may be limited in clinical practice because of high probability of the autoantibody positivity for RA without ILD and no standard cut-off points for its assays.

## ABSTRACT

### Objective

To clarify the risk of rheumatoid arthritis-associated interstitial lung disease (RA-ILD) related to anti-cyclic citrullinated peptide (CCP) antibody.

### Eligibility criteria

Patients with RA with and without ILD were eligible. The primary outcome was the prevalence or incidence of ILD. Primary studies of any design aside from a case report were eligible.

### Information sources

Medline, EMBASE, Science Citation Index Expanded and Cochrane Central Register of Controlled Trials were searched from the inception through 12 November 2019.

### Data extraction and risk of bias

Two reviewers independently selected eligible reports, extracted relevant data and assessed risk of bias using a modified Quality in Prognostic Studies tool.

### Data synthesis

Meta-analysis was conducted using a random-effects model.

### Quality of evidence

The Grades of Recommendation, Assessment, Development and Evaluation system was applied.

### Results

1  
2  
3  
4  
5  
6 Among 29 out of 827 records retrieved through electronic databases and four additional  
7 reports identified from other sources, 29 studies were focused for the review. A total of  
8 10158 subjects were included and the mean age at inclusion was between 45.8 and 63.9  
9 years. The mean RA duration was between 4.3 and 14.9 years. The positivity of  
10 anti-CCP antibody ranged from 50.7% to 95.8%. All studies except for two were  
11 deemed as high risk of bias. A pooled analysis of univariate results demonstrated that  
12 the presence of anti-CCP antibody was significantly associated with RA-ILD with an  
13 OR of 2.10 (95%CI: 1.59-2.78). Similarly, the titre of anti-CCP antibody was  
14 significantly higher for RA-ILD with an SMD of 0.42 (95%CI: 0.20-0.65). These  
15 results were confirmed by multivariate analysis in the majority of studies and consistent  
16 by any subgroup and sensitivity analyses.

### 31 Conclusion

32  
33  
34 The presence and higher titres of anti-CCP antibody were suggested to be significantly  
35 associated with an increased risk of RA-ILD. However, the quality of evidence was  
36 rated as low or very low.  
37  
38  
39  
40  
41  
42  
43  
44  
45  
46  
47  
48  
49  
50  
51  
52  
53  
54  
55  
56  
57  
58  
59  
60

## Background

Rheumatoid arthritis (RA) is a systemic autoimmune disorder that is characterized by a chronic synovial inflammation and eventual joint destruction.[1] Although arthritis is the main manifestation of the disease, it also damages diverse extra-articular organs such as heart, lung, kidney, eye and skin.[2] Interstitial lung disease (ILD) is one of the most common comorbidities of RA and the prevalence of ILD for patients with RA is reported to be 10% to 40% although it varies depending on the target population, a definition of the disease and diagnostic modalities.[3] A complication of ILD deeply affects the prognosis of RA because RA-associated ILD (RA-ILD) is often progressive and only a limited therapeutic option is available.[4] It is also complicated by acute exacerbation and lung cancer.[5-6] As a result, ILD is reported to be the third leading cause of deaths of RA [7] and approximately two thirds of patients with RA-ILD eventually die within 5 years, resulting in a hazard ratio of mortality about 3.0 in comparison to RA without ILD.[8] Moreover, the most common type of ILDs among RA-ILDs, i.e., usual interstitial pneumonia (UIP),[9] demonstrates the worst prognosis, which is similar to the mortality of idiopathic pulmonary fibrosis (IPF).[10] In this context estimating the risk of developing ILD will help clinicians' decision-making and may improve the prognosis of the disease.[11] Historically, a number of studies investigated risk factors for the development of ILD and some clinical information are reported to be associated with an increased risk of RA-ILD, which include male gender,[12] smoking,[13] severe disease [14] and rheumatoid factor (RF).[15] Anti-citrullinated peptide antibody (ACPA) is a specific marker for RA and included in the latest classification criteria for an accurate diagnosis of the disease.[16] Currently,

1  
2  
3  
4  
5  
6 anti-cyclic citrullinated peptide (CCP) antibody, representing ACPAs is available  
7  
8 commercially and usually measured in clinical practice. The autoantibody is also  
9  
10 reported to be associated with an increased risk of extra-articular manifestations such as  
11  
12 ILD.[17] However, previous studies noted inconsistent results [18-19] and the former  
13  
14 systematic review seems to be limited by relatively a small number of studies and  
15  
16 unclear definition of ILD and IPF.[20] The aim of this systematic review and  
17  
18 meta-analysis was to clarify current evidence regarding the association of anti-CCP  
19  
20 antibody with RA-ILD.  
21  
22  
23

## 24 **Methods**

25  
26  
27 This review was conducted and reported according to the Preferred Reporting Items for  
28  
29 Systematic Reviews and Meta-Analyses (PRISMA) [21] and the Meta-analysis of  
30  
31 Observational Studies in Epidemiology (MOOSE) statement.[22]  
32  
33

### 34 Patient and public involvement

35  
36  
37 There was no patient and public involvement in the whole process of conducting this  
38  
39 research.  
40  
41

### 42 Eligibility

43  
44  
45 Patients with RA were eligible for this review. RA was diagnosed based on its widely  
46  
47 used classification criteria, i.e., the 1987 American College of Rheumatology  
48  
49 classification criteria [23] and the 2010 American College of Rheumatology/European  
50  
51 League Against Rheumatism classification criteria.[16] ILD was characterized by  
52  
53 interstitial inflammatory and fibrotic changes in pulmonary parenchyma and diagnosed  
54  
55 based on symptomatic, functional, radiological and/or pathological findings.[24] The  
56  
57  
58  
59  
60

1  
2  
3  
4  
5  
6 pattern of ILD was classified following the international multidisciplinary classification  
7  
8 such as an official American Thoracic Society/European Respiratory Society  
9  
10 statement.[25] Other pulmonary lesions associated with RA such as bronchiolitis,  
11  
12 bronchiectasis and pleuritis were all excluded. An overlap with other connective tissue  
13  
14 diseases was included if RA was the main disease of interest in the study. There was no  
15  
16 limitation regarding demographic features of subjects, such as gender and ethnicity,  
17  
18 duration of RA and ILD and the severity of the disease unless they were less than the  
19  
20 age of 18. Subjects were allowed to participate at any point in time along their clinical  
21  
22 course of the disease.  
23  
24

25  
26  
27 Anti-CCP antibody was examined using Enzyme-Linked Immunosorbent Assay  
28  
29 (ELISA).[26] Although measurements of anti-CCP antibody were different among  
30  
31 manufacturers and each institution adopted a different test, all kinds of anti-CCP  
32  
33 antibody assays were eligible for the review. However, ACPA, which was not specified  
34  
35 as anti-CCP antibody, was excluded because it may have represented autoantibodies  
36  
37 against different citrullinated peptides.  
38  
39

40  
41 The outcome of interest in this review was the prevalence or incidence of ILD. Any  
42  
43 design of primary studies other than a case report was eligible if it described the  
44  
45 association of anti-CCP antibody with RA-ILD. Conference proceedings, letters or  
46  
47 editorials and review articles were ineligible. Only reports published in English was  
48  
49 considered.  
50  
51

## 52 53 Search strategy

54  
55  
56 The following electronic databases were searched, Medline, EMBASE, Science Citation  
57  
58 Index Expanded and Cochrane Central Register of Controlled Trials, using subject  
59  
60

1  
2  
3  
4  
5  
6 headings and text words related to study population such as ‘rheumatoid arthritis’,  
7  
8 ‘interstitial lung disease’ and ‘anti-cyclic citrullinated peptide antibodies’ (e-Appendix).  
9  
10 Search terms were constructed referring to a systematic review in a similar research area  
11  
12 identified through the Cochrane Database of Systematic Reviews (CDSR).[27]  
13  
14 Methodology filters were not used to avoid limiting the sensitivity of the search. The  
15  
16 search was covered from the inception of each database through to the 12<sup>th</sup> of  
17  
18 November 2019. The reference lists of eligible studies and relevant review articles were  
19  
20 also hand-searched to identify additional reports. Google Scholar was employed to  
21  
22 search grey literature.[28]  
23  
24  
25

#### 26 27 Study selection and data collection process

28  
29 Two reviewers (H.K. and O.M.P.) independently examined titles and abstracts of all  
30  
31 retrieved articles to select eligible reports. The same reviewers also extracted relevant  
32  
33 data based on a modified data extraction form, which was previously published in a  
34  
35 protocol paper for a systematic review.[29] Any uncertainty or disagreement between  
36  
37 reviewers arising from these processes was resolved through discussion. The following  
38  
39 data was extracted from each eligible study: first author’s name, year of publication,  
40  
41 study location, study design, sample size and its demographic features, ILD patterns if  
42  
43 available, manufacturers of anti-CCP antibody tests and their cut-off points if available,  
44  
45 a proportion of positivity and titres of anti-CCP antibodies for RA with and without  
46  
47 ILD, methods for statistical analysis, summary statistics and items associated with a risk  
48  
49 of bias.  
50  
51  
52  
53

#### 54 55 Risk of bias in individual studies

1  
2  
3  
4  
5  
6 As all studies investigated the association of anti-CCP antibody with RA-ILD as risk  
7 prediction, the Quality in Prognostic Studies (QUIPS) tool was modified and applied to  
8 assess a risk of bias in individual studies.[30] However, one of six domains that  
9 constitute the tool, i.e., ‘the attrition of study population’, was considered irrelevant and  
10 thus excluded because all studies were designed as cross-sectional or case-control  
11 studies. Each domain received an individual bias rating (low, moderate or high), with an  
12 overall risk of bias based on a total rating of all domains. For example, a study showing  
13 a low risk of bias across all domains was deemed as being subject to a low risk of bias  
14 overall.  
15  
16  
17  
18  
19  
20  
21  
22  
23  
24  
25  
26

## 27 Statistical analysis

### 28 *Summary statistics*

29  
30  
31  
32 The risk of RA-ILD associated with the presence of anti-CCP antibody was measured  
33 using either risk ratios (RRs) or odds ratios (ORs). In a case where titres of anti-CCP  
34 antibody were compared between the two comparative groups with or without ILD, the  
35 mean difference (MD) was calculated to reveal the difference of the autoantibody titres.  
36  
37 If the median was utilized instead of the mean, it was presented for each of the two  
38 groups. If the summary statistics were not provided directly, the ORs or RRs were  
39 calculated manually based on the absolute number of the outcome across the two  
40 comparative groups.  
41  
42  
43  
44  
45  
46  
47  
48  
49  
50

### 51 *Data synthesis*

52  
53  
54 The effect of an association between anti-CCP antibody and RA-ILD was statistically  
55 combined if it was presented using the same statistics in three or more studies. The  
56  
57  
58  
59  
60



1  
2  
3  
4  
5  
6 results were summarized using ORs if anti-CCP antibody was reported as binary  
7  
8 (positive/negative). If the titre of anti-CCP antibody was reported, a standardized MD  
9  
10 (calculated as Hedge's  $g$ ) was utilized to combine the results.[31] If the median, range  
11  
12 or interquartile range was described to report the autoantibody titres, they were  
13  
14 converted to the mean and standard deviation, using a formula reported by a previous  
15  
16 study, to be summarized as SMDs.[32] Only the results of univariate analysis were  
17  
18 combined whereas those of multivariate analysis were described qualitatively because  
19  
20 adjusted variables in multivariate models varied substantially between studies and  
21  
22 pooling these data could be misleading. If meta-analysis was feasible from the collated  
23  
24 data, it was conducted using a random-effects model employing the DerSimonian and  
25  
26 Laird method.[33] Meta-analysis was conducted using the statistical software package,  
27  
28 Review Manager (RevMan) Version 5.3 (Copenhagen: The Nordic Cochrane Centre,  
29  
30 The Cochrane Collaboration, 2014). Statistical significance was considered with a  
31  
32 p-value of  $<0.05$ . If combining data was deemed inappropriate due to a small number of  
33  
34 studies, the results were reported qualitatively.  
35  
36  
37  
38

#### 40 *Heterogeneity between studies*

41  
42  
43 Between-study variance was assessed using both  $Q$  statistics and  $I^2$  value. For the  
44  
45 assessment of heterogeneity between studies, statistical significance was considered  
46  
47 with a p-value of  $<0.1$  due to the low power of the test. Magnitude of heterogeneity was  
48  
49 categorised as low ( $<30\%$ ), moderate ( $\geq 30\%$ ,  $<50\%$ ), considerable ( $\geq 50\%$ ,  $<70\%$ ) and  
50  
51 substantial ( $\geq 70\%$ ).[34] When heterogeneity was identified, the 95% prediction interval  
52  
53 (PI) was presented in addition to the 95% confidence interval (CI).[35] To better  
54  
55 interpret sources of heterogeneity, subgroup analysis was conducted based on study  
56  
57  
58  
59  
60

1  
2  
3  
4  
5  
6 location (Asia or non-Asia) and study design (cross-sectional or case-control).  
7

8 Sensitivity analysis was also considered focusing on the measurements of anti-CCP  
9 antibody (same manufacturer and same generation of the autoantibody assay). A  
10 meta-regression analysis was also conducted to assess the effect of other potential  
11 confounders, i.e., age, gender, smoking history, RA duration, diagnostic criteria for RA  
12 and ILD and a proportion of positivity of anti-CCP antibody. The analysis was  
13 conducted using SAS ODA (SAS Institute Inc., Cary, NC, USA).  
14  
15  
16  
17  
18  
19  
20  
21

### 22 *Meta-biases*

23  
24 Small study bias (such as publication bias) was examined graphically using a funnel  
25 plot and statistically by the Egger's test using Stata 14 (STATA Corp LLC., College  
26 Station, TX, USA) if ten or more studies were available for meta-analysis.[36]  
27  
28 Statistical significance of the test was considered with a p-value of <0.1 due to the low  
29 power of the test.  
30  
31  
32  
33  
34  
35

### 36 Confidence in cumulative evidence

37  
38 The Grades of Recommendation, Assessment, Development and Evaluation (GRADE)  
39 for prognosis [37] was applied to assess the credibility of evidence generated from this  
40 review because all studies investigated the association of anti-CCP antibody with  
41 RA-ILD as risk prediction.  
42  
43  
44  
45  
46  
47  
48  
49

## 50 **Results**

### 51 Search for eligible studies

52  
53 Out of a total of 827 records identified through a search of five electronic databases, 182  
54 duplicates were removed and 645 records were screened by titles and abstracts. After  
55  
56  
57  
58  
59  
60

1  
2  
3  
4  
5  
6 320 records consisting of non-English reports (n=16) and 304 articles of ineligible types  
7  
8 (conference proceedings (n=153), case reports (n=72), editorials or letters (n=10) and  
9  
10 review articles (n=69)) and 265 irrelevant papers were further excluded, the remaining  
11  
12 60 records were retrieved as full-texts. Out of these, 29 reports/studies were eligible for  
13  
14 the review and additionally four reports were identified through a hand-search of  
15  
16 references of eligible studies. As a result, a total of 33 reports were considered for the  
17  
18 review (Figure 1). In each of three different groups, which conducted two studies  
19  
20 sharing the same cohort, only the study with a larger sample size was included for the  
21  
22 review.[38-40] Similarly, among three studies conducted by one group, the study with  
23  
24 the largest sample size was included for the review.[41] Furthermore, another study  
25  
26 among these three studies was also included because it reported two different cohorts,  
27  
28 one of which was not overlapped by the other studies.[42] There was also a study that  
29  
30 reported two different cohorts, only one of which was included because it was not  
31  
32 overlapped by the other studies.[43] Finally, a total of 29 studies/cohorts were focused  
33  
34 for further analysis.[38-66]

#### 40 Characteristics of included studies

41  
42  
43 Study location of a total of 29 studies were distributed globally with Asia in the largest  
44  
45 number (n=15), which was followed by the Americas (n=7), Europe (n=3), Africa (n=2)  
46  
47 and others (n=2). 22 studies were cross-sectional while the remaining seven were  
48  
49 case-control studies. A complication of other CTDs was mentioned in 10 studies and  
50  
51 ILD patterns were detailed in three studies. The number of subjects enrolled in each  
52  
53 study ranged from 41 to 2702, which amounted to 10158 subjects in total and the mean  
54  
55 age at inclusion was between 45.8 and 63.9 years. The proportion of men, smoking  
56  
57  
58  
59  
60

1  
2  
3  
4  
5  
6 history and ILD ranged from 4.0% to 90.1%, 1.9% to 98.9% and 4.9% to 71.6%,  
7  
8 respectively. The mean duration of RA was between 4.3 and 14.9 years and the disease  
9  
10 activity, which was represented by the disease activity score (DAS) 28, was between 2.5  
11  
12 and 5.4 as a mean value (Table 1). Other baseline characteristics of included studies  
13  
14 were depicted in the supplementary file (e-Table 1). The generation of anti-CCP  
15  
16 antibody tests was specified in 14 studies, which consisted of the second generation in  
17  
18 12 studies and the third generation in two studies. The proportion of positivity of  
19  
20 anti-CCP antibody was reported in 21 studies, which ranged from 50.7% to 95.8%  
21  
22 while the titre of the autoantibody was described in 18 studies (Table 2).  
23  
24  
25  
26

#### 27 Risk of bias in individual studies

28  
29  
30 All studies except for two contained high risk of bias rating in at least one domain and  
31  
32 thus was deemed as high risk of bias. Among the five domains constituting the QUIPS  
33  
34 tool, the risk of bias for statistical analysis and reporting and ILD confirmation were  
35  
36 rated as high in the majority of studies due to no or insufficient information regarding  
37  
38 model building process and inconsistent diagnostic procedures. The remaining two  
39  
40 studies were rated as moderate risk of bias (Table 3).  
41  
42  
43

#### 44 Association of anti-CCP antibody with RA-ILD

##### 45 46 47 *Univariate result*

48  
49  
50 The association of positivity of anti-CCP antibody with RA-ILD was reported in 20  
51  
52 studies. Eight out of these studies demonstrated significant results with the ORs ranging  
53  
54 from 1.98 to 44.5 (Table 2). Excluding one study,[47] which conducted a stratified  
55  
56 analysis based on the level of the autoantibody titre and thus was not combined, a  
57  
58  
59  
60

1  
2  
3  
4  
5  
6 meta-analysis of 19 out of these 20 studies demonstrated that the presence of anti-CCP  
7  
8 antibody was significantly associated with RA-ILD with an OR of 2.10 (95%CI:  
9  
10 1.59-2.78) with moderate heterogeneity ( $\chi^2=29.7$ ,  $p=0.04$ ,  $I^2=39\%$ ) (Figure 2).

11  
12  
13 The titre of anti-CCP antibody was compared between RA with and without ILD in 18  
14  
15 studies. Two studies employed the same assay (INOVA Diagnostics) to examine the  
16  
17 titre of anti-CCP antibody and reported higher titres associated with RA-ILD with an  
18  
19 MD of 79.5 (95%CI: 9.72-149.3) [46] and a median value of 220 for RA-ILD vs. 120  
20  
21 for RA without ILD [48], respectively. Other two studies examined the titre of the  
22  
23 autoantibody using another assay (Euroimmun). One of them demonstrated higher titres  
24  
25 associated with RA-ILD with a median value of 77.9 for RA-ILD vs. 30.2 for RA  
26  
27 without ILD [59] and the other study reported non-significant result with an MD of  
28  
29 143.2 (95%CI: -78.1-364.5).[62] All of the other studies utilized a different or unknown  
30  
31 measurement to examine the titre of the autoantibody. Overall, 11 studies demonstrated  
32  
33 significant results with higher titres associated with RA-ILD (Table 2). Excluding six  
34  
35 studies [40, 44, 47, 51, 56, 59] where MDs were unable to be calculated, a  
36  
37 meta-analysis of 12 out of these 18 studies demonstrated that the titre of anti-CCP  
38  
39 antibody was significantly higher for RA-ILD with an SMD of 0.42 (95%CI: 0.20-0.65)  
40  
41 with considerable heterogeneity ( $\chi^2=36.0$ ,  $p=0.0002$ ,  $I^2=69\%$ ) (Figure 3).

#### 42 43 44 45 46 47 48 *Multivariate result*

49  
50 Multivariate analysis was conducted in eight studies where detailed results were  
51  
52 available in seven studies and adjusted variables were diverse between studies. Six of  
53  
54 these seven studies demonstrated a positive association between the presence or higher  
55  
56 titres of anti-CCP antibody and RA-ILD and the results were statistically significant in  
57  
58

1  
2  
3  
4  
5  
6 four studies (Table 2). One study [65] revealed the association of positivity of anti-CCP  
7 antibody with RA-ILD as an OR of 3.50 (95%CI: 1.52-8.04) (Table 2). The association  
8 of the titre of anti-CCP antibody with RA-ILD was reported by three studies as ORs of  
9 1.41 (95%CI: 1.01-1.97), 1.08 (95%CI: 1.03-1.12) and 1.06 (95%CI: 1.02-1.10).[47, 53,  
10 59, respectively]

### 11 12 13 14 15 16 17 18 *Subgroup analysis*

19  
20  
21 Subgroup analysis was conducted based on both study location and study design. There  
22 was no significant difference in the effect size of the positivity of anti-CCP antibody  
23 with ORs of 2.02 (95% CI: 1.37-2.99) by Asian reports and 2.22 (95%CI: 1.45-3.39) by  
24 non-Asian reports (p=0.75) (e-Figure 1). Similarly, there was no significant difference  
25 in the effect size of the titre of anti-CCP antibody with SMDs of 0.38 (95%CI:  
26 0.04-0.71) by Asian reports and 0.49 (95%CI: 0.24-0.74) by non-Asian reports (p=0.58)  
27 (e-Figure 2). There was no significant difference in the effect size of the positivity of  
28 anti-CCP antibody with ORs of 2.00 (95%CI: 1.48-2.71) by cross-sectional studies and  
29 2.53 (95%CI: 1.26-5.08) by case-control studies (p=0.55) (e-Figure 3). Similarly, there  
30 was no significant difference in the effect size of the titre of anti-CCP antibody with  
31 SMDs of 0.39 (95%CI: 0.11-0.67) by cross-sectional studies and 0.50 (95%CI:  
32 0.12-0.89) by case-control studies (p=0.65) (e-Figure 4).

### 33 34 35 36 37 38 39 40 41 42 43 44 45 46 47 48 *Sensitivity analysis*

49  
50  
51 Sensitivity analysis was conducted focusing on the measurements of anti-CCP antibody.  
52 A pooled analysis of 10 studies that examined the second generation of anti-CCP  
53 antibody test demonstrated that the presence of anti-CCP antibody was significantly  
54 associated with RA-ILD with an OR of 2.22 (95%CI: 1.42-3.45) (e-Figure 5). A pooled  
55  
56  
57  
58  
59  
60

1  
2  
3  
4  
5  
6 analysis of three studies that examined the second generation of anti-CCP antibody test  
7  
8 by the same manufacture (Euroimmun, Lübeck, Germany) demonstrated that the  
9  
10 presence of anti-CCP antibody was significantly associated with RA-ILD with an OR of  
11  
12 3.81 (95%CI: 1.08-13.5) (e-Figure 6).  
13  
14

15  
16 Sensitivity analysis was also conducted for the titre of anti-CCP antibody focusing on  
17  
18 the same summary statistics. A pooled analysis of seven studies where MDs were  
19  
20 available without a conversion of summary statistics demonstrated higher titres  
21  
22 associated with RA-ILD with an MD of 52.5 (95%CI: 5.76-99.2) (e-Figure 7).  
23  
24

25 All of these sensitivity analyses generated no significant difference of the results.  
26  
27

#### 28 Meta-regression analysis 29

30  
31 The effect of the presence of anti-CCP antibody on RA-ILD was not influenced by any  
32  
33 other potential confounders. Similarly, the association of the titre of anti-CCP antibody  
34  
35 with RA-ILD was not affected by any of them although gender and RA duration were  
36  
37 significant in univariate analysis (e-Table 2).  
38  
39

#### 40 Additional analysis 41

42  
43 Two funnel plots (for both positivity and titre of anti-CCP antibody) were constructed to  
44  
45 investigate small study bias, both of which demonstrated no apparent asymmetry  
46  
47 (e-Figure 8 and e-Figure 9, respectively). This graphical assessment was confirmed  
48  
49 statistically by the Egger's test, which demonstrated no statistical significance (p=0.15  
50  
51 and 0.28, respectively).  
52  
53

#### 54 Assessment of evidence level 55 56 57 58 59 60

1  
2  
3  
4  
5  
6 Study limitation was considered present in all of the evidence because no studies were  
7  
8 deemed as low risk of bias. Publication bias was also considered present in all of the  
9  
10 evidence due to the property of studies of risk prediction [37] although it was not  
11  
12 confirmed in both graphical and statistical analyses regarding univariate results. Overall,  
13  
14 the level of evidence derived from this review was rated as low or very low (Table 4).  
15  
16

## 17 **Discussion**

18  
19  
20 This study demonstrated using a pooled analysis of univariate results that the presence  
21  
22 of anti-CCP antibody was significantly associated with RA-ILD and the titre of  
23  
24 anti-CCP antibody was significantly higher for RA-ILD than RA without ILD. The  
25  
26 results were confirmed by multivariate analyses in the majority of studies that reported  
27  
28 it. These findings suggest that anti-CCP antibody is related to an increased risk of ILD  
29  
30 for patients with RA. As this review was based on a large number of studies conducted  
31  
32 globally and the results were reproduced by any subgroup and sensitivity analyses, these  
33  
34 findings will be generalizable to a broader population.  
35  
36  
37

38  
39 It is desirable and important to identify a high risk group of patients with RA who are  
40  
41 likely to develop ILD because it is often progressive and worsens the prognosis of the  
42  
43 disease.[67] If the development of ILD can be predicted, it will help clinicians'  
44  
45 decision-making and facilitate an efficient use of limited medical resources to change  
46  
47 clinical course of the disease. Much effort has been made to identify clinical  
48  
49 information such as serum biomarkers that can easily be obtained and help estimate the  
50  
51 risk of ILD for patients with RA.[68] Tests for ACPAs emerged as a tool to diagnose  
52  
53 early RA with higher specificity than traditionally employed RF.[69] They date back to  
54  
55 the discovery of anti-perinuclear factor and anti-keratin antibody in the sera of patients  
56  
57  
58  
59  
60



1  
2  
3  
4  
5  
6 with RA, which recognized the citrullinated protein filaggrin.[70] Subsequently, cyclic  
7  
8 citrullinated peptides (CCP) were synthesized to improve test performance [71] and  
9  
10 after further evolution currently the third generation of anti-CCP antibody test is  
11  
12 commercially available.[72] Anti-CCP antibody is not only helpful to diagnose RA but  
13  
14 also reported to be associated with extra-articular manifestations of the disease.[73] The  
15  
16 recent meta-analysis demonstrated an increased risk of RA-ILD as a result of serum  
17  
18 anti-CCP antibody positivity.[20] Although a number of specific citrullinated proteins  
19  
20 were discovered such as fibrinogen [74] and  $\alpha$ -enolase,[75] a diagnostic significance of  
21  
22 specific autoantibodies directed against these autoantigens has yet to be established.[76]  
23  
24  
25

26  
27 RA is classified as a systemic autoimmune disorder although the pathogenesis of the  
28  
29 disease has been under dispute for many years.[77] Recent research suggests that the  
30  
31 breakdown of immunological tolerance initially occurs in the lungs under the influence  
32  
33 of environmental stress such as exposure to cigarette smoke and genetic  
34  
35 susceptibility.[78] In short, smoking accelerates the activity of the enzyme  
36  
37 peptidylarginine deiminase that catalyses the posttranslational convert of arginine to  
38  
39 citrulline, which eventually induces autoimmune reaction and leads to the formation of  
40  
41 autoantibodies against citrullinated peptides under the interplay of both T and B  
42  
43 lymphocytes.[79] In these processes, a number of cytokines are generated and may  
44  
45 promote fibrotic changes of the lung.[80] Smoking is related to the development of ILD,  
46  
47 in particular, UIP, which is the most common type among RA-ILDs [9] and contributes  
48  
49 to the formation of ACPAs. Therefore, it is most likely that anti-CCP antibody is  
50  
51 closely associated with the development of ILD for genetically susceptible subjects with  
52  
53 smoking history and this relationship was confirmed in this report.  
54  
55  
56  
57  
58  
59  
60

1  
2  
3  
4  
5  
6 The current study is different from the previous systematic review [20] in that it  
7  
8 included a larger number of studies and subjects and thus the result is considered more  
9  
10 reliable. It also demonstrated that the titre of anti-CCP antibody was higher for RA-ILD  
11  
12 than RA without ILD. This finding is meaningful because anti-CCP antibody may be  
13  
14 positive in the majority of patients with RA regardless of the presence of ILD. Indeed,  
15  
16 the proportion of positivity of anti-CCP antibody for RA without ILD in this review  
17  
18 ranged from 49.1% to 95.8% with the median value of 71.0%. When the group of RA  
19  
20 without ILD is positive for anti-CCP antibody with high frequency, the benefit of the  
21  
22 autoantibody test for screening patients with RA at a higher risk of developing ILD will  
23  
24 be limited. Conversely, the finding of titres may be more informative because it can also  
25  
26 be employed to patients with RA without ILD who are tested positive for the  
27  
28 autoantibody. Therefore, titres of anti-CCP antibody may be more useful than just its  
29  
30 presence to estimate the risk of developing ILD. However, the interpretation of this  
31  
32 finding also needs a caution because it was derived from a comparison between  
33  
34 RA-ILD and RA without ILD and thus does not indicate any cut-off point that defines a  
35  
36 high or low titre of the autoantibody. As a result, in usual clinical practice, clinicians  
37  
38 need to assess the implication of the titre of anti-CCP antibody in the context of a total  
39  
40 evaluation. If the titre of the autoantibody is combined with clinical features such as  
41  
42 age, gender and smoking history alongside with other biomarkers such as Krebs von  
43  
44 den Lungen-6 (KL-6), creating composite scores, it would be more beneficial to identify  
45  
46 a group with a higher risk of developing ILD. However, what makes the issue more  
47  
48 complicated is the variability of measurements of anti-CCP antibody, which was  
49  
50 produced by a number of manufacturers. The sensitivity and specificity varies  
51  
52 depending on the tests and the titres are also different between assays.[81] Although an  
53  
54  
55  
56  
57  
58  
59  
60

1  
2  
3  
4  
5  
6 SMD was employed in this review to enable the comparison of titres derived from  
7  
8 different tests, the result may be difficult to be applied in clinical practice. Furthermore,  
9  
10 anti-CCP antibody is reported to be closely associated with bronchiolar disease, which  
11  
12 is also a common pulmonary complication associated with RA alongside with ILD.[54]  
13  
14 Although bronchiolar disease was excluded in this review, it is possible that the disease  
15  
16 was missed by the researcher or not selectively reported. If this was the case, the precise  
17  
18 association of anti-CCP antibody with RA-ILD will be compromised. Anti-CCP  
19  
20 antibody may also be affected by a number of other potential confounders such as age,  
21  
22 gender, smoking history, RA duration, diagnostic criteria for RA and ILD and the  
23  
24 proportion of positivity of anti-CCP antibody, which were diverse between studies.  
25  
26 Although none of these confounders were found to be significantly associated with the  
27  
28 heterogeneity of the results, it may possibly have been influenced by other clinical  
29  
30 factor such as previous treatment. Therefore, the findings of this review may not be  
31  
32 directly applicable to usual clinical practice and clinicians should consider all of the  
33  
34 factors that can affect the presence or titres of anti-CCP antibody and assess the risk of  
35  
36 ILD for patients with RA on a case-by-case basis.  
37  
38  
39  
40  
41  
42

43 There are other methodological limitations or caveats that need to be kept in mind to  
44  
45 appropriately interpret the findings of this study. First, this review specifically focused  
46  
47 on anti-CCP antibody and excluded ACPAs, which were not specified as anti-CCP  
48  
49 antibody since it may have represented autoantibodies against different citrullinated  
50  
51 peptides. However, ACPAs other than anti-CCP antibody are not usually used in  
52  
53 clinical practice and many rheumatologic teams may use the term ACPA for anti-CCP  
54  
55 antibody. Therefore, this narrow inclusion criterion may have excluded some studies  
56  
57  
58  
59  
60

1  
2  
3  
4  
5  
6 with a large number of subjects that could have reinforced the strength of meta-analysis.  
7  
8 Second, this review was only composed of cross-sectional and case-control studies and  
9  
10 thus causality between anti-CCP antibody and RA-ILD cannot be deducted although it  
11  
12 is aetiologically plausible. Third, selection bias of subjects in individual studies cannot  
13  
14 be ruled out. Patients with RA-ILD at relatively advanced stage may have been included  
15  
16 for the review. If this was the case, the findings may not be applicable to an early stage  
17  
18 of the disease and become useless for screening purpose. Fourth, anti-CCP antibody  
19  
20 may be most closely related to UIP among other types of ILD complicated with RA.  
21  
22 However, the association between anti-CCP antibody and individual ILD patterns could  
23  
24 not be elucidated in this review because most of the studies did not report them. Finally,  
25  
26 no studies were deemed as low risk of bias given that most of them were retrospectively  
27  
28 designed cross-sectional or case-control studies. Due to this study limitation, the level  
29  
30 of evidence obtained from this review was all rated as low or very low although  
31  
32 univariate results in relatively a larger number of studies were combined to generate an  
33  
34 average estimate. Therefore, more research with high quality using a prospective cohort  
35  
36 design needs to be accumulated to make a definitive conclusion or solidify the findings  
37  
38 of this review.  
39  
40  
41  
42  
43  
44

## 45 **Conclusion**

46  
47 This systematic review and meta-analysis suggested that the presence of anti-CCP  
48  
49 antibody was significantly associated with RA-ILD and the titre of the autoantibody  
50  
51 was significantly higher for RA-ILD than RA without ILD. However, an applicability  
52  
53 of these findings may be limited due to the heterogeneity of included studies.  
54  
55  
56  
57

## 58 **Ethics approval and participant consent**

1  
2  
3  
4  
5  
6 Neither ethics approval nor participant consent was required as this study was based  
7  
8 solely on the summary results of previously published articles. Individual patient data  
9  
10 were not obtained or accessed.  
11  
12

### 13 14 **Data sharing**

15  
16  
17 The dataset used and/or analysed for this review will be available from the  
18  
19 corresponding author upon a reasonable request and may become open to the public  
20  
21 through a digital repository (such as Dryad) after the final result is published in a  
22  
23 journal.  
24  
25

### 26 27 **Conflict of interest**

28  
29  
30 None to declare.  
31  
32

### 33 34 **Funding**

35  
36  
37 This research received no specific grant from any funding agency in either the public,  
38  
39 commercial, or not-for-profit sectors.  
40  
41

### 42 43 **Authors' contributions**

44  
45  
46 H.K. planned the entire research project and analysed the data. He also summarized the  
47  
48 result and wrote the manuscript. H.K. has full access to the data and takes responsibility  
49  
50 for its integrity as well as the accuracy of the analysis.  
51  
52

53  
54 O.M.P. contributed to the design of the research project and conducted the literature  
55  
56 search and data extraction. He was also involved in revising the manuscript.  
57  
58

1  
2  
3  
4  
5  
6 All researchers provided thoughts and opinions to compile a draft paper and approved  
7  
8 of the final version of the manuscript.  
9  
10  
11  
12  
13  
14  
15  
16  
17  
18  
19  
20  
21  
22  
23  
24  
25  
26  
27  
28  
29  
30  
31  
32  
33  
34  
35  
36  
37  
38  
39  
40  
41  
42  
43  
44  
45  
46  
47  
48  
49  
50  
51  
52  
53  
54  
55  
56  
57  
58  
59  
60

For peer review only

## References

1. Smolen JS, Aletaha D, McInnes IB. Rheumatoid arthritis. *Lancet* 2016;388:2023-38.
2. Turesson C. Extra-articular rheumatoid arthritis. *Curr Opin Rheumatol* 2013;25:360-6.
3. Shaw M, Collins BF, Ho LA, et al. Rheumatoid arthritis-associated lung disease. *Eur Respir Rev* 2015;24:1-16.
4. Iqbal K, Kelly C. Treatment of rheumatoid arthritis-associated interstitial lung disease: a perspective review. *Ther Adv Musculoskelet Dis* 2015;7:247-67.
5. Hozumi H, Nakamura Y, Johkoh T, et al. Acute exacerbation in rheumatoid arthritis-associated interstitial lung disease: a retrospective case control study. *BMJ Open* 2013;3:e003132.
6. Nurmi HM, Purokivi MK, Karkkainen MS, et al. Variable course of disease of rheumatoid arthritis-associated usual interstitial pneumonia compared to other subtypes. *BMC Pulm Med* 2016;16:107.
7. Turesson C, Jacobsson L, Bergstrom U. Extra-articular rheumatoid arthritis: prevalence and mortality. *Rheumatology* 1999;38:668-74.
8. Bongartz T, Nannini C, Medina-Velasquez YF, et al. Incidence and mortality of interstitial lung disease in rheumatoid arthritis: a population-based study. *Arthritis Rheum* 2010;62:1583-91.
9. Tsuchiya Y, Takayanagi N, Sugiura H, et al. Lung diseases directly associated with rheumatoid arthritis and their relationship to outcome. *Eur Respir J* 2011;37:1411-7.

10. Solomon JJ, Ryu JH, Tazelaar HD, et al. Fibrosing interstitial pneumonia predicts survival in patients with rheumatoid arthritis-associated interstitial lung disease (RA-ILD). *Respir Med* 2013;107:1247-52.
11. Paulin F, Babini A, Mamani M, et al. Practical approach to the evaluation and management of rheumatoid arthritis-interstitial lung disease based on its proven and hypothetical mechanisms. *Rev Invest Clin* 2017;69:235-42.
12. Gabbay E, Tarala R, Will R, et al. Interstitial lung disease in recent onset rheumatoid arthritis. *Am J Respir Crit Care Med* 1997;156:528-35.
13. Gochuico BR, Avila NA, Chow CK, et al. Progressive preclinical interstitial lung disease in rheumatoid arthritis. *Arch Intern Med* 2008;168:159-66.
14. Habib HM, Eisa AA, Arafat WR, et al. Pulmonary involvement in early rheumatoid arthritis patients. *Clin Rheumatol* 2011;30:217-21.
15. Zhang Y, Li H, Wu N, et al. Retrospective study of the clinical characteristics and risk factors of rheumatoid arthritis-associated interstitial lung disease. *Clin Rheumatol* 2017;36:817-23.
16. Aletaha D, Neogi T, Silman AJ, et al. 2010 Rheumatoid arthritis classification criteria: an American College of Rheumatology/European League Against Rheumatism collaborative initiative. *Arthritis Rheum* 2010;62:2569-81.
17. Aubart F, Crestani B, Nicaise-Roland P, et al. High levels of anti-cyclic citrullinated peptide autoantibodies are associated with co-occurrence of pulmonary diseases with rheumatoid arthritis. *J Rheumatol* 2011;38:979-82.
18. Inui N, Enomoto N, Suda T, et al. Anti-cyclic citrullinated peptide antibodies in lung diseases associated with rheumatoid arthritis. *Clin Biochem* 2008;41:1074-7.



- 1  
2  
3  
4  
5  
6 19. Jearn LH, Kim TY. Level of anticitrullinated peptide/protein antibody is not  
7 associated with lung diseases in rheumatoid arthritis. *J Rheumatol* 2012;39:1493-4.  
8  
9  
10 20. Zhu J, Zhou Y, Chen X, et al. A metaanalysis of the increased risk of  
11 rheumatoid arthritis-related pulmonary disease as a result of serum anticitrullinated  
12 protein antibody positivity. *J Rheumatol* 2014;41:1282-9.  
13  
14  
15 21. Moher D, Liberati A, Tetzlaff J, et al. Preferred reporting items for systematic  
16 reviews and meta-analyses: the PRISMA statement. *Ann Intern Med* 2009;151:264-9.  
17  
18  
19 22. Stroup DF, Berlin JA, Morton SC, et al. Meta-analysis of observational studies  
20 in epidemiology: a proposal for reporting. Meta-analysis of observational studies in  
21 epidemiology (MOOSE) group. *JAMA* 2000;283:2008-12.  
22  
23  
24 23. Arnett FC, Edworthy SM, Bloch DA, et al. The American Rheumatism  
25 Association 1987 revised criteria for the classification of rheumatoid arthritis. *Arthritis*  
26 *Rheum* 1988;31:315-24.  
27  
28  
29 24. American Thoracic Society. American Thoracic Society/European Respiratory  
30 Society international multidisciplinary consensus classification of the idiopathic  
31 interstitial pneumonias. *Am J Respir Crit Care Med* 2002;165:277-304.  
32  
33  
34 25. Travis WD, Costabel U, Hansell DM, et al. An official American Thoracic  
35 Society/European Respiratory Society statement: update of the international  
36 multidisciplinary classification of the idiopathic interstitial pneumonias. *Am J Respir*  
37 *Crit Care Med* 2013;188:733-48.  
38  
39  
40 26. Suzuki K, Sawada T, Murakami A, et al. High diagnostic performance of  
41 ELISA detection of antibodies to citrullinated antigens in rheumatoid arthritis. *Scand J*  
42 *Rheumatol* 2003;32:197-204.  
43  
44  
45  
46  
47  
48  
49  
50  
51  
52  
53  
54  
55  
56  
57  
58  
59  
60

- 1  
2  
3  
4  
5  
6 27. Lopez-Olivo MA, Siddhanamatha HR, Shea B, et al. Methotrexate for treating  
7  
8  
9  
10  
11 28. Haddaway NR, Collins AM, Coughlin D, et al. The role of google scholar in  
12  
13  
14  
15  
16  
17 29. Kamiya H, Panlaqui OM. Prognostic significance of autoantibodies for  
18  
19  
20  
21  
22  
23  
24 30. Hayden JA, Cote P, Bombardier C. Evaluation of the quality of prognosis  
25  
26  
27  
28  
29 31. Hedges LV. Distribution theory for Glass's estimator of effect size and related  
30  
31  
32  
33  
34  
35  
36  
37  
38  
39  
40 33. DerSimonian R, Laird N. Meta-analysis in clinical trials. *Control Clin Trials*  
41  
42  
43  
44  
45 34. Higgins JPT, Green S, eds. Cochrane Handbook for Systematic Reviews of  
46  
47  
48  
49  
50  
51 35. Riley RD, Higgins JP, Deeks JJ. Interpretation of random effects  
52  
53  
54  
55  
56 36. Egger M, Davey Smith G, Schneider M, et al. Bias in meta-analysis detected  
57  
58  
59  
60

- 1  
2  
3  
4  
5  
6 37. Huguet A, Hayden JA, Stinson J, et al. Judging the quality of evidence in  
7 reviews of prognostic factor research: adapting the GRADE framework. *Syst Rev*  
8 2013;2:71.  
9  
10  
11  
12 38. Alunno A, Bistoni O, Pratesi F, et al. Anti-citrullinated alpha enolase  
13 antibodies, interstitial lung disease and bone erosion in rheumatoid arthritis.  
14 *Rheumatology* 2018;57:850-5.  
15  
16  
17 39. England BR, Duryee MJ, Roul P, et al. Malondialdehyde-acetaldehyde adducts  
18 and antibody responses in rheumatoid arthritis-interstitial lung disease. *Arthritis*  
19 *Rheumatol* 2019;71:1483-93.  
20  
21  
22 40. Giles JT, Danoff SK, Sokolove J, et al. Association of fine specificity and  
23 repertoire expansion of anticitrullinated peptide antibodies with rheumatoid arthritis  
24 associated interstitial lung disease. *Ann Rheum Dis* 2014;73:1487-94.  
25  
26  
27 41. Chen J, Shi Y, Wang X, et al. Asymptomatic preclinical rheumatoid  
28 arthritis-associated interstitial lung disease. *Clin Dev Immunol* 2013;2013:406927.  
29  
30  
31 42. Chen J, Doyle TJ, Liu Y, et al. Biomarkers of rheumatoid arthritis-associated  
32 interstitial lung disease. *Arthritis Rheumatol* 2015;67:28-38.  
33  
34  
35 43. Doyle TJ, Patel AS, Hatabu H, et al. Detection of rheumatoid  
36 arthritis-interstitial lung disease is enhanced by serum biomarkers. *Am J Respir Crit*  
37 *Care Med* 2015;191:1403-12.  
38  
39  
40 44. Abdel-Mageed SA-H, Foda EE, Abdel-Azeez EM, et al. Increased risk of  
41 rheumatoid arthritis-related pulmonary disease as a results of serum anticitrullinated  
42 protein antibody positivity. *Egypt J Hosp Med* 2019;76:3572-80.  
43  
44  
45 45. Akiyama M, Kaneko Y, Yamaoka K, et al. Association of disease activity with  
46 acute exacerbation of interstitial lung disease during tocilizumab treatment in patients  
47  
48  
49  
50  
51  
52  
53  
54  
55  
56  
57  
58  
59  
60

with rheumatoid arthritis: a retrospective, case-control study. *Rheumatol Int*

2016;36:881-9.

46. Alexiou I, Germenis A, Koutroumpas A, et al. Anti-cyclic citrullinated peptide-2 (CCP2) autoantibodies and extra-articular manifestations in Greek patients with rheumatoid arthritis. *Clin Rheumatol* 2008;27:511-3.

47. Correia CS, Briones MR, Guo R, et al. Elevated anti-cyclic citrullinated peptide antibody titer is associated with increased risk for interstitial lung disease. *Clin Rheumatol* 2019;38:1201-6.

48. Fadda S, Khairy N, Fayed H, et al. Interstitial lung disease in Egyptian patients with rheumatoid arthritis: frequency, pattern and correlation with clinical manifestations and anti-citrullinated peptide antibodies level. *Egypt Rheumatol* 2018;40:155-60.

49. Furukawa H, Oka S, Shimada K, et al. Association of human leukocyte antigen with interstitial lung disease in rheumatoid arthritis: a protective role for shared epitope. *PLoS One* 2012;7:e33133.

50. Kakutani T, Hashimoto A, Tominaga A, et al. Related factors, increased mortality and causes of death in patients with rheumatoid arthritis-associated interstitial lung disease. *Mod Rheumatol* 2019:1-19.

51. Kelly CA, Saravanan V, Nisar M, et al. Rheumatoid arthritis-related interstitial lung disease: associations, prognostic factors and physiological and radiological characteristics-a large multicentre UK study. *Rheumatology* 2014;53:1676-82.

52. Liu Y, Liu C, Li L, et al. High levels of antibodies to citrullinated alpha-enolase peptide-1 (CEP-1) identify erosions and interstitial lung disease (ILD) in a Chinese rheumatoid arthritis cohort. *Clinical Immunology* 2019;200:10-5.

- 1  
2  
3  
4  
5  
6 53. Matsuo T, Hashimoto M, Ito I, et al. Interleukin-18 is associated with the  
7 presence of interstitial lung disease in rheumatoid arthritis: a cross-sectional study.  
8  
9 *Scand J Rheumatol* 2019;48:87-94.
- 10  
11  
12 54. Mori S, Koga Y, Sugimoto M, et al. Different risk factors between interstitial  
13 lung disease and airway disease in rheumatoid arthritis. *Respir Med* 2012;106:1591-9.  
14  
15  
16 55. Ortancil O, Bulmus N, Ozdolap S, et al. Anti-cyclic citrullinated peptide  
17 antibodies in rheumatoid arthritis and their relationship with extra-articular  
18 manifestations. *Turk J Rheumatol* 2011;26:193-8.  
19  
20  
21  
22 56. Park WH, Kim SS, Shim SC, et al. Visual Assessment of chest computed  
23 tomography findings in anti-cyclic citrullinated peptide antibody positive rheumatoid  
24 arthritis: is it associated with airway abnormalities? *Lung* 2016;194:97-105.  
25  
26  
27  
28 57. Paulin F, Doyle TJ, Mercado JF, et al. Development of a risk indicator score  
29 for the identification of interstitial lung disease in patients with rheumatoid arthritis.  
30  
31 *Reumatol Clin* 2019;S1699-258X: 30111-1.  
32  
33  
34  
35 58. Restrepo JF, del Rincon I, Battafarano DF, et al. Clinical and laboratory factors  
36 associated with interstitial lung disease in rheumatoid arthritis. *Clin Rheumatol*  
37 2015;34:1529-36.  
38  
39  
40  
41 59. Rocha-Munoz AD, Ponce-Guarneros M, Gamez-Nava JI, et al. Anti-cyclic  
42 citrullinated peptide antibodies and severity of interstitial lung disease in women with  
43 rheumatoid arthritis. *J Immunol Res* 2015;2015:151626.  
44  
45  
46  
47 60. Sargin G, Kose R, Senturk T. Tumor-associated antigens in rheumatoid  
48 arthritis interstitial lung disease or malignancy? *Arch Rheumatol* 2018;33:431-7.  
49  
50  
51  
52  
53  
54  
55  
56  
57  
58  
59  
60

- 1  
2  
3  
4  
5  
6 61. Sulaiman FN, Wong KK, Ahmad WAW, et al. Anti-cyclic citrullinated peptide  
7 antibody is highly associated with rheumatoid factor and radiological defects in  
8 rheumatoid arthritis patients. *Medicine* 2019;98:e14945.  
9  
10  
11  
12 62. Tian F, Li J, Tuo H, et al. The anti-mutated citrullinated vimentin antibody as a  
13 potential predictor for rheumatoid arthritis associated interstitial lung diseases. *Int J*  
14 *Clin Exp Med* 2016;9:6813-8.  
15  
16  
17 63. Wang T, Zheng XJ, Liang BM, et al. Clinical features of rheumatoid  
18 arthritis-associated interstitial lung disease. *Sci Rep* 2015;5:14897.  
19  
20  
21 64. Yang JA, Lee JS, Park JK, et al. Clinical characteristics associated with  
22 occurrence and poor prognosis of interstitial lung disease in rheumatoid arthritis.  
23 *Korean J Intern Med* 2019;34:434-41.  
24  
25  
26 65. Yin Y, Liang D, Zhao L, et al. Anti-cyclic citrullinated peptide antibody is  
27 associated with interstitial lung disease in patients with rheumatoid arthritis. *PLoS One*  
28 2014;9:e92449.  
29  
30  
31 66. Zhang J, Li J, Yu X, et al. Changes and clinical significance of serum tumor  
32 markers in patients with rheumatoid arthritis combined with interstitial lung disease. *J*  
33 *Hainan Med Univ* 2018;24:46-9.  
34  
35  
36 67. Kim EJ, Elicker BM, Maldonado F, et al. Usual interstitial pneumonia in  
37 rheumatoid arthritis-associated interstitial lung disease. *Eur Respir J* 2010;35:1322-8.  
38  
39  
40 68. Trouw LA, Mahler M. Closing the serological gap: promising novel  
41 biomarkers for the early diagnosis of rheumatoid arthritis. *Autoimmun Rev*  
42 2012;12:318-22.  
43  
44  
45  
46  
47  
48  
49  
50  
51  
52  
53  
54  
55  
56  
57  
58  
59  
60

- 1  
2  
3  
4  
5  
6 69. Taylor P, Gartemann J, Hsieh J, et al. A systematic review of serum biomarkers  
7 anti-cyclic citrullinated peptide and rheumatoid factor as tests for rheumatoid arthritis.  
8  
9  
10 *Autoimmune Dis* 2011;2011:815038.  
11  
12 70. Girbal-Neuhauser E, Durieux JJ, Arnaud M, et al. The epitopes targeted by the  
13 rheumatoid arthritis-associated antifilaggrin autoantibodies are posttranslationally  
14 generated on various sites of (pro)filaggrin by deimination of arginine residues. *J*  
15  
16  
17  
18  
19  
20  
21 *Immunol* 1999;162:585-94.  
22 71. Schellekens GA, Visser H, de Jong BA, et al. The diagnostic properties of  
23 rheumatoid arthritis antibodies recognizing a cyclic citrullinated peptide. *Arthritis*  
24  
25  
26  
27  
28  
29  
30  
31  
32  
33  
34  
35  
36  
37  
38  
39  
40  
41  
42  
43  
44  
45  
46  
47  
48  
49  
50  
51  
52  
53  
54  
55  
56  
57  
58  
59  
60
71. Schellekens GA, Visser H, de Jong BA, et al. The diagnostic properties of rheumatoid arthritis antibodies recognizing a cyclic citrullinated peptide. *Arthritis Rheum* 2000;43:155-63.
72. Swart A, Burlingame RW, Gurtler I, et al. Third generation anti-citrullinated peptide antibody assay is a sensitive marker in rheumatoid factor negative rheumatoid arthritis. *Clin Chim Acta* 2012;414:266-72.
73. Turesson C, Jacobsson LT, Sturfelt G, et al. Rheumatoid factor and antibodies to cyclic citrullinated peptides are associated with severe extra-articular manifestations in rheumatoid arthritis. *Ann Rheum Dis* 2007;66:59-64.
74. Sebbag M, Moinard N, Auger I, et al. Epitopes of human fibrin recognized by the rheumatoid arthritis-specific autoantibodies to citrullinated proteins. *Eur J Immunol* 2006;36:2250-63.
75. Mahdi H, Fisher BA, Kallberg H, et al. Specific interaction between genotype, smoking and autoimmunity to citrullinated alpha-enolase in the etiology of rheumatoid arthritis. *Nat Genet* 2009;41:1319-24.
76. Boman A, Brink M, Lundquist A, et al. Antibodies against citrullinated peptides are associated with clinical and radiological outcomes in patients with early

1  
2  
3  
4  
5  
6 rheumatoid arthritis: a prospective longitudinal inception cohort study. *RMD Open*  
7  
8 2019;5:e000946.

9  
10 77. Scott DL, Wolfe F, Huizinga TW. Rheumatoid arthritis. *Lancet*  
11  
12 2010;376:1094-108.

13  
14 78. Perry E, Kelly C, Eggleton P, et al. The lung in ACPA-positive rheumatoid  
15  
16 arthritis: an initiating site of injury? *Rheumatology* 2014;53:1940-50.

17  
18 79. Cavagna L, Monti S, Grosso V, et al. The multifaceted aspects of interstitial  
19  
20 lung disease in rheumatoid arthritis. *Biomed Res Int* 2013;2013:759760.

21  
22 80. Brito Y, Glassberg MK, Ascherman DP. Rheumatoid arthritis-associated  
23  
24 interstitial lung disease: current concepts. *Curr Rheumatol Rep* 2017;19:79.

25  
26 81. Van Hoovels L, Jacobs J, Vander Cruyssen B, et al. Performance  
27  
28 characteristics of rheumatoid factor and anti-cyclic citrullinated peptide antibody assays  
29  
30 may impact ACR/EULAR classification of rheumatoid arthritis. *Ann Rheum Dis*  
31  
32 2018;77:667-77.  
33  
34  
35  
36  
37  
38  
39  
40  
41  
42  
43  
44  
45  
46  
47  
48  
49  
50  
51  
52  
53  
54  
55  
56  
57  
58  
59  
60



Table 1 Baseline characteristics of included studies<sup>a</sup>

| Study                | Location | Design                       | Number<br>(n) | Age at<br>inclusion<br>(years) | Gender (male)<br>(n (%)) | Smoking (n<br>(%)) | Proportion of ILD<br>(n (%)) <sup>b</sup> | Disease duration<br>(RA) (years)      | Disease activity <sup>c</sup>       | Other CTDs<br>(n) | ILD patterns (on<br>HRCT) (n) |
|----------------------|----------|------------------------------|---------------|--------------------------------|--------------------------|--------------------|-------------------------------------------|---------------------------------------|-------------------------------------|-------------------|-------------------------------|
| Alunno 2018<br>[38]  | Italy    | Cross-sectional              | 252           | 61.7±0.8                       | 56 (22.2)                | -                  | 37 (20.2) (n=183)                         | 12.6±0.6                              | -                                   | -                 | -                             |
| England 2019<br>[39] | US       | Cross-sectional <sup>d</sup> | 1823          | 63.5±11.0                      | (90.1)                   | (89.5)             | 90 (4.9)                                  | 11.1±11.5                             | 4.0±1.6                             | -                 | -                             |
| Giles 2014<br>[40]   | US       | Cross-sectional <sup>d</sup> | 177           | 59±8 <sup>e</sup>              | 71 (40.1)                | 105 (59.3)         | 120 (67.8)                                | 9 (5-19) vs. 8<br>(4-16) <sup>g</sup> | 3.7 (2.9-4.4) <sup>g</sup><br>(CRP) | -                 | -                             |
| Chen 2013<br>[41]    | China    | Cross-sectional              | 103           | 49.1±14.7                      | 27 (26.2)                | 2 (1.9)            | 63 (61.2)                                 | 4.3±5.7                               | 4.4±1.4                             | -                 | -                             |
| Chen 2015<br>[42]    | China    | Cross-sectional              | 71            | 60.7±12.1 <sup>e</sup>         | 37 (52.1)                | 35 (49.3)          | 49 (69.0)                                 | 12.8±10.3 vs.<br>8.4±8.1 (n=68)       | 3.7±1.2 vs.<br>3.3±1.7 (n=43)       | -                 | -                             |
| Doyle 2015<br>[43]   | US       | Cross-sectional <sup>d</sup> | 75            | 61.5±12.7 <sup>e</sup>         | 11 (14.7)                | 41 (54.7)          | -                                         | -                                     | -                                   | -                 | -                             |

|    |              |        |                 |      |                        |           |            |                 |                        |                  |              |               |
|----|--------------|--------|-----------------|------|------------------------|-----------|------------|-----------------|------------------------|------------------|--------------|---------------|
| 1  |              |        |                 |      |                        |           |            |                 |                        |                  |              |               |
| 2  |              |        |                 |      |                        |           |            |                 |                        |                  |              |               |
| 3  |              |        |                 |      |                        |           |            |                 |                        |                  |              |               |
| 4  |              |        |                 |      |                        |           |            |                 |                        |                  |              |               |
| 5  | Abdel-Hamid  | Egypt  | Cross-sectional | 50   | 45.8±12.3              | 2 (4.0)   | -          | 19 (38.0)       | 9.8±6.6                | 4.7±1.3          | 0            | -             |
| 6  | 2019 [44]    |        |                 |      |                        |           |            |                 |                        |                  |              |               |
| 7  |              |        |                 |      |                        |           |            |                 |                        |                  |              |               |
| 8  | Akiyama      | Japan  | Cross-sectional | 395  | 58.5±13.1              | 49 (12.4) | 69 (20.3)  | 78 (19.7)       | 129.4±115.2            | 4.9±1.6 (n=372)  | 38 (SS, SSc, | -             |
| 9  | 2016 [45]    |        |                 |      |                        |           | (n=340)    |                 | (months)               |                  | PM/DM,       |               |
| 10 |              |        |                 |      |                        |           |            |                 |                        |                  | SLE)         |               |
| 11 |              |        |                 |      |                        |           |            |                 |                        |                  |              |               |
| 12 |              |        |                 |      |                        |           |            |                 |                        |                  |              |               |
| 13 |              |        |                 |      |                        |           |            |                 |                        |                  |              |               |
| 14 | Alexiou 2008 | Greece | Case-control    | 136  | -                      | -         | -          | N/A (ILD 11/no  | -                      | -                | -            | -             |
| 15 | [46]         |        |                 |      |                        |           |            | ILD 125)        |                        |                  |              |               |
| 16 |              |        |                 |      |                        |           |            |                 |                        |                  |              |               |
| 17 |              |        |                 |      |                        |           |            |                 |                        |                  |              |               |
| 18 | Correia 2019 | US     | Cross-sectional | 453  | 59.6±15.7              | (19.4)    | -          | (6.0)           | -                      | -                | 0            | -             |
| 19 | [47]         |        |                 |      |                        |           |            |                 |                        |                  |              |               |
| 20 |              |        |                 |      |                        |           |            |                 |                        |                  |              |               |
| 21 |              |        |                 |      |                        |           |            |                 |                        |                  |              |               |
| 22 |              |        |                 |      |                        |           |            |                 |                        |                  |              |               |
| 23 | Fadda 2018   | Egypt  | Cross-sectional | 88   | 50.2±9.0               | 13 (14.8) | 87 (98.9)  | 63 (71.6)       | 10.2±6.2               | 14 (1-32) vs. 12 | 0            | UIP 62%, NSIP |
| 24 | [48]         |        |                 |      |                        |           |            |                 |                        | (3-25) (median   |              | 27%, Mixed 1% |
| 25 |              |        |                 |      |                        |           |            |                 |                        | (range)) (CDAI)  |              |               |
| 26 |              |        |                 |      |                        |           |            |                 |                        |                  |              |               |
| 27 |              |        |                 |      |                        |           |            |                 |                        |                  |              |               |
| 28 | Furukawa     | Japan  | Case-control    | 450  | 63.9±10.9 <sup>e</sup> | 89 (19.8) | 130 (28.9) | N/A (ILD 129/no | 14.5±10.9 <sup>e</sup> | -                | -            | -             |
| 29 | 2012 [49]    |        |                 |      |                        |           |            | ILD 321)        |                        |                  |              |               |
| 30 |              |        |                 |      |                        |           |            |                 |                        |                  |              |               |
| 31 |              |        |                 |      |                        |           |            |                 |                        |                  |              |               |
| 32 |              |        |                 |      |                        |           |            |                 |                        |                  |              |               |
| 33 | Kakutani     | Japan  | Cross-sectional | 2702 | 62.8±12.5              | (17.8)    | (28.9)     | 261 (9.7)       | 9 (15) vs. 10 (17)     | 3.2±1.0 (ESR)    | -            | -             |
| 34 | 2019 [50]    |        |                 |      |                        |           |            |                 | (median (IQR))         |                  |              |               |
| 35 |              |        |                 |      |                        |           |            |                 |                        |                  |              |               |
| 36 |              |        |                 |      |                        |           |            |                 |                        |                  |              |               |
| 37 |              |        |                 |      |                        |           |            |                 |                        |                  |              |               |
| 38 |              |        |                 |      |                        |           |            |                 |                        |                  |              |               |
| 39 |              |        |                 |      |                        |           |            |                 |                        |                  |              |               |
| 40 |              |        |                 |      |                        |           |            |                 |                        |                  |              |               |
| 41 |              |        |                 |      |                        |           |            |                 |                        |                  |              |               |
| 42 |              |        |                 |      |                        |           |            |                 |                        |                  |              |               |
| 43 |              |        |                 |      |                        |           |            |                 |                        |                  |              |               |
| 44 |              |        |                 |      |                        |           |            |                 |                        |                  |              |               |
| 45 |              |        |                 |      |                        |           |            |                 |                        |                  |              |               |
| 46 |              |        |                 |      |                        |           |            |                 |                        |                  |              |               |

1  
2  
3  
4  
5  
6  
7  
8  
9  
10  
11  
12  
13  
14  
15  
16  
17  
18  
19  
20  
21  
22  
23  
24  
25  
26  
27  
28  
29  
30  
31  
32  
33  
34  
35  
36  
37  
38  
39  
40  
41  
42  
43  
44  
45  
46

|                    |        |                 |     |                                                         |            |           |                          |                                                  |               |                    |                        |
|--------------------|--------|-----------------|-----|---------------------------------------------------------|------------|-----------|--------------------------|--------------------------------------------------|---------------|--------------------|------------------------|
| Kelly 2014 [51]    | UK     | Case-control    | 460 | -                                                       | 220 (47.8) | -         | N/A (ILD 230/no ILD 230) | -                                                | -             | -                  | -                      |
| Liu 2019 [52]      | China  | Cross-sectional | 101 | 54 (17) (median (IQR))                                  | 26 (25.7)  | -         | 23 (22.8)                | 7 (14) (median (IQR))                            | 4.0±1.9       | -                  | -                      |
| Matsuo 2018 [53]   | Japan  | Cross-sectional | 312 | 63.5±12.7                                               | 41 (13.1)  | 95 (30.4) | 26 (8.3)                 | 14.9±11.6                                        | 2.5±1.1 (CRP) | 11 (not specified) | -                      |
| Mori 2012 [54]     | Japan  | Cross-sectional | 356 | 72.5 (12.3) (n=24) vs. 59.0 (16) (n=302) (median (IQR)) | 85 (23.9)  | 76 (21.3) | 24 (6.7)                 | 1.5 (6.3) (n=24) vs 0 (6) (n=302) (median (IQR)) | -             | -                  | UIP 5, NSIP 19         |
| Ortancil 2011 [55] | Turkey | Cross-sectional | 67  | 57.4±13.5                                               | 14 (20.9)  | -         | 12 (17.9)                | 10.2±11.7 <sup>e</sup>                           | -             | -                  | -                      |
| Park 2016 [56]     | Korea  | Cross-sectional | 83  | 53.7±10.1 <sup>e</sup>                                  | 10 (12.0)  | -         | 7 (8.4)                  | -                                                | -             | -                  | UIP 6, Indeterminate 1 |

|    |             |           |                 |     |                        |            |            |                 |                        |                      |   |   |
|----|-------------|-----------|-----------------|-----|------------------------|------------|------------|-----------------|------------------------|----------------------|---|---|
| 1  |             |           |                 |     |                        |            |            |                 |                        |                      |   |   |
| 2  |             |           |                 |     |                        |            |            |                 |                        |                      |   |   |
| 3  |             |           |                 |     |                        |            |            |                 |                        |                      |   |   |
| 4  |             |           |                 |     |                        |            |            |                 |                        |                      |   |   |
| 5  | Paulin 2019 | Argentina | Case-control    | 118 | 56.7±15.7              | 26 (22.0)  | 52 (44.1)  | N/A (ILD 52/ no | 6 (8) (median          | 3.4±1.1              | - | - |
| 6  | [57]        |           |                 |     |                        |            |            | ILD 66)         | (IQR))                 |                      |   |   |
| 7  |             |           |                 |     |                        |            |            |                 |                        |                      |   |   |
| 8  | Restrepo    | US        | Cross-sectional | 779 | 53.7±13.3              | 161 (25.5) | 357 (56.5) | 69 (8.9)        | 10.5±10.3 <sup>e</sup> | 5.4±1.4 <sup>e</sup> | - | - |
| 9  | 2015 [58]   |           |                 |     | (n=632) <sup>e</sup>   | (n=632)    | (n=632)    |                 |                        |                      |   |   |
| 10 |             |           |                 |     |                        |            |            |                 |                        |                      |   |   |
| 11 |             |           |                 |     |                        |            |            |                 |                        |                      |   |   |
| 12 | Rocha-Munoz | Mexico    | Case-control    | 81  | 51.0                   | -          | 22 (27.2)  | N/A (ILD 39/no  | 7.0 (1.0-35.0) vs.     | 3.9 (1.7-5.3) vs.    | 0 | - |
| 13 | 2015 [59]   |           |                 |     | (36.0-72.0)            |            |            | ILD 42)         | 6.5 (0.75-25.0)        | 2.5 (1.7-5.1)        |   |   |
| 14 |             |           |                 |     | vs. 49.0               |            |            |                 | (median (range))       | (median (range))     |   |   |
| 15 |             |           |                 |     | (24.0-73.0)            |            |            |                 |                        |                      |   |   |
| 16 |             |           |                 |     | (median                |            |            |                 |                        |                      |   |   |
| 17 |             |           |                 |     | (range))               |            |            |                 |                        |                      |   |   |
| 18 |             |           |                 |     |                        |            |            |                 |                        |                      |   |   |
| 19 |             |           |                 |     |                        |            |            |                 |                        |                      |   |   |
| 20 |             |           |                 |     |                        |            |            |                 |                        |                      |   |   |
| 21 |             |           |                 |     |                        |            |            |                 |                        |                      |   |   |
| 22 |             |           |                 |     |                        |            |            |                 |                        |                      |   |   |
| 23 |             |           |                 |     |                        |            |            |                 |                        |                      |   |   |
| 24 | Sargin 2018 | Turkey    | Cross-sectional | 83  | 59.3±12.1              | 20 (24.1)  | 9 (10.8)   | 43 (51.8)       | -                      | -                    | 0 | - |
| 25 | [60]        |           |                 |     |                        |            |            |                 |                        |                      |   |   |
| 26 |             |           |                 |     |                        |            |            |                 |                        |                      |   |   |
| 27 |             |           |                 |     |                        |            |            |                 |                        |                      |   |   |
| 28 | Sulaiman    | Malaysia  | Cross-sectional | 159 | 48.3±14.1              | 25 (15.7)  | -          | 21 (13.2)       | -                      | 4.7±0.9 (ESR)        | 0 | - |
| 29 | 2019 [61]   |           |                 |     |                        |            |            |                 |                        |                      |   |   |
| 30 |             |           |                 |     |                        |            |            |                 |                        |                      |   |   |
| 31 |             |           |                 |     |                        |            |            |                 |                        |                      |   |   |
| 32 | Tian 2016   | China     | Cross-sectional | 75  | -                      | 29 (38.7)  | -          | 37 (49.3)       | -                      | -                    | - | - |
| 33 | [62]        |           |                 |     |                        |            |            |                 |                        |                      |   |   |
| 34 |             |           |                 |     |                        |            |            |                 |                        |                      |   |   |
| 35 |             |           |                 |     |                        |            |            |                 |                        |                      |   |   |
| 36 | Wang 2015   | China     | Cross-sectional | 41  | 60.7±12.4 <sup>e</sup> | 20 (48.8)  | -          | 25 (61.0)       | 108 (5-360) vs. 72     | -                    | - | - |
| 37 |             |           |                 |     |                        |            |            |                 |                        |                      |   |   |
| 38 |             |           |                 |     |                        |            |            |                 |                        |                      |   |   |

|               |       |                 |     |                        |           |           |                 |                       | (2-552) (months) |   |                         |   |
|---------------|-------|-----------------|-----|------------------------|-----------|-----------|-----------------|-----------------------|------------------|---|-------------------------|---|
|               |       |                 |     |                        |           |           |                 |                       | (median (range)) |   |                         |   |
| [63]          |       |                 |     |                        |           |           |                 |                       |                  |   |                         |   |
| Yang 2019     | Korea | Case-control    | 308 | 57.0±12.0 <sup>e</sup> | 76 (24.7) | 39 (17.7) | N/A (ILD 77/ no | 11.0±7.3 <sup>e</sup> | -                | - | -                       | - |
| [64]          |       |                 |     |                        |           | (n=220)   | ILD 231)        |                       |                  |   |                         |   |
| Yin 2014 [65] | China | Cross-sectional | 285 | 51.7±13.4 <sup>e</sup> | 74 (26.0) | 59 (20.7) | 71 (24.9)       | 9.0 (16.0) vs. 4.0    | 5.4±1.7          |   | 61 <sup>f</sup> (SS 41, | - |
|               |       |                 |     |                        |           |           |                 | (9.1) (median         |                  |   | SSc 7,                  |   |
|               |       |                 |     |                        |           |           |                 | (IQR))                |                  |   | PM/DM 4,                |   |
|               |       |                 |     |                        |           |           |                 |                       |                  |   | SLE 16)                 |   |
| Zhang 2018    | China | Case-control    | 75  | 41-69 vs.              | 30 (40.0) | -         | N/A (ILD 28/ no | -                     | -                |   | 0                       | - |
| [66]          |       |                 |     | 40-70                  |           |           | ILD 47)         |                       |                  |   |                         |   |
|               |       |                 |     | (range)                |           |           |                 |                       |                  |   |                         |   |

a, Comparisons correspond to RA-ILD vs. RA without ILD and the values are expressed as mean±SD or number (proportion) unless otherwise specified;

b, N/A indicates not applicable due to case-control studies;

c, Disease activity was estimated using disease activity score (DAS) 28 unless otherwise specified and a laboratory marker used to calculate the score was described as either ESR or CRP if it was specified;

d, indicates a prospective study while all of the other studies are retrospectively designed;

1  
2  
3  
4 e, calculated combining the figure in both comparative groups;  
5

6 f, some patients had multiple CTDs;  
7

8 g, unknown statistics;  
9

10 CDAI, clinical disease activity index; CRP, C-reactive protein; CTD, connective tissue disease; ESR, erythrocyte sedimentation rate; HRCT, high  
11 resolution computed tomography; ILD, interstitial lung disease; IQR, interquartile range; NSIP, non-specific interstitial pneumonia;  
12  
13 PM/DM, polymyositis/dermatomyositis; RA, rheumatoid arthritis; SLE, systemic lupus erythematosus; SS, Sjögren syndrome; SSc,  
14  
15 systemic sclerosis; UIP, usual interstitial pneumonia;  
16  
17  
18  
19  
20  
21  
22  
23  
24  
25  
26  
27  
28  
29  
30  
31  
32  
33  
34  
35  
36  
37  
38  
39  
40  
41  
42  
43  
44  
45  
46

Table 2 Anti-cyclic citrullinated peptide (CCP) antibody tests and its association with rheumatoid arthritis-associated interstitial lung disease<sup>a</sup>

| Study             | Measurements of anti-CCP antibody (manufacturer) (cut-off points) | Proportion of anti-CCP antibody | Titres of anti-CCP antibody                              | Univariate result (positivity) | Univariate result (titre)   | Multivariate result (positivity) | Multivariate result (titre) | Adjusted variables |
|-------------------|-------------------------------------------------------------------|---------------------------------|----------------------------------------------------------|--------------------------------|-----------------------------|----------------------------------|-----------------------------|--------------------|
| Alunno 2018 [38]  | Second generation (Thermo Fisher Scientific or Aesku)             | 28/37 (75.7) vs. 90/146 (61.6)  | -                                                        | OR 1.94 (0.85-4.42)            | -                           | -                                | -                           | -                  |
| England 2019 [39] | Second generation                                                 | (86.7) vs. (76.7)               | -                                                        | <b>OR 1.98, p=0.03</b>         | -                           | -                                | -                           | -                  |
| Giles 2014 [40]   | Second generation                                                 | 51/57 (89.5) vs. 82/120 (68.3)  | 152 (99-194) (n=32) vs. 89 (11-152) (n=120) <sup>d</sup> | <b>OR 3.94 (1.57-9.90)</b>     | <b>p=0.0005<sup>b</sup></b> | -                                | -                           | -                  |
| Chen 2013 [41]    | Not specified                                                     | -                               | 231.8±178.0 (n=63) vs. 196.8±161.1 (n=40)                | -                              | MD 35.0 (-33.0-103.0)       | -                                | -                           | -                  |
| Chen 2015 [42]    | Not specified                                                     | -                               | 142.6±151.9 (n=49) vs. 154.6±151.4 (n=22)                | -                              | MD -12.0 (-88.2-64.2)       | -                                | -                           | -                  |

|    |              |                     |                  |                         |                            |                           |                   |                       |                       |
|----|--------------|---------------------|------------------|-------------------------|----------------------------|---------------------------|-------------------|-----------------------|-----------------------|
| 1  |              |                     |                  |                         |                            |                           |                   |                       |                       |
| 2  |              |                     |                  |                         |                            |                           |                   |                       |                       |
| 3  |              |                     |                  |                         |                            |                           |                   |                       |                       |
| 4  |              |                     |                  |                         |                            |                           |                   |                       |                       |
| 5  | Doyle 2015   | Not specified       | -                | 188±133 vs. 83±113      | -                          | -                         | -                 | -                     | -                     |
| 6  | [43]         |                     |                  |                         |                            |                           |                   |                       |                       |
| 7  |              |                     |                  |                         |                            |                           |                   |                       |                       |
| 8  | Abdel-Hamid  | Third generation    | 30/50 (60.0)     | 100 (390) (n=19) vs. 20 | -                          | <b>p=0.04<sup>b</sup></b> | -                 | -                     | -                     |
| 9  | 2019 [44]    |                     |                  | (298) (n=31) (median    |                            |                           |                   |                       |                       |
| 10 |              |                     |                  | (IQR))                  |                            |                           |                   |                       |                       |
| 11 |              |                     |                  |                         |                            |                           |                   |                       |                       |
| 12 |              |                     |                  |                         |                            |                           |                   |                       |                       |
| 13 |              |                     |                  |                         |                            |                           |                   |                       |                       |
| 14 | Akiyama      | Not specified (≥4.5 | 69/75 (92.0) vs. | -                       | <b>OR 2.82 (1.17-6.81)</b> | -                         | OR 1.80           | -                     | age, sex, smoking, RF |
| 15 | 2016 [45]    | U/mL)               | 245/305 (80.3)   |                         |                            |                           | (0.70-4.40)       |                       |                       |
| 16 |              |                     |                  |                         |                            |                           | (positive with    |                       |                       |
| 17 |              |                     |                  |                         |                            |                           | high titre (>13.5 |                       |                       |
| 18 |              |                     |                  |                         |                            |                           | U/mL))            |                       |                       |
| 19 |              |                     |                  |                         |                            |                           |                   |                       |                       |
| 20 |              |                     |                  |                         |                            |                           |                   |                       |                       |
| 21 |              |                     |                  |                         |                            |                           |                   |                       |                       |
| 22 |              |                     |                  |                         |                            |                           |                   |                       |                       |
| 23 |              |                     |                  |                         |                            |                           |                   |                       |                       |
| 24 | Alexiou 2008 | Second generation   | 10/11 (90.9) vs. | 152.6±104.5 (n=11) vs.  | OR 7.12 (0.89-56.9)        | <b>MD 79.5</b>            | -                 | -                     | -                     |
| 25 | [46]         | (INOVA Diagnostics) | 73/125 (58.4)    | 73.1±114.0 (n=125)      |                            | <b>(9.72-149.3)</b>       |                   |                       |                       |
| 26 |              | (20 IU/mL)          |                  |                         |                            |                           |                   |                       |                       |
| 27 |              |                     |                  |                         |                            |                           |                   |                       |                       |
| 28 |              |                     |                  |                         |                            |                           |                   |                       |                       |
| 29 |              |                     |                  |                         |                            |                           |                   |                       |                       |
| 30 | Correia 2019 | Second generation   | -                | 113.0±5.9 (162.4 vs.    | OR 1.51 (0.48-4.74)        | <b>p=0.04<sup>b</sup></b> | -                 | <b>OR 1.41</b>        | age, smoking          |
| 31 | [47]         | (Euro-Diagnostica)  |                  | 109.9) (mean±SE)        | (low titre), 2.61          |                           |                   | <b>(1.01-1.97)/1</b>  |                       |
| 32 |              | (≥6 U/mL)           |                  |                         | (0.59-11.5)( moderate      |                           |                   | <b>group of titre</b> |                       |
| 33 |              |                     |                  |                         | titre), 2.83 (0.96-8.39)   |                           |                   |                       |                       |
| 34 |              |                     |                  |                         | (high titre)               |                           |                   |                       |                       |
| 35 |              |                     |                  |                         |                            |                           |                   |                       |                       |
| 36 |              |                     |                  |                         |                            |                           |                   |                       |                       |
| 37 |              |                     |                  |                         |                            |                           |                   |                       |                       |
| 38 |              |                     |                  |                         |                            |                           |                   |                       |                       |



1  
2  
3  
4  
5  
6  
7  
8  
9  
10  
11  
12  
13  
14  
15  
16  
17  
18  
19  
20  
21  
22  
23  
24  
25  
26  
27  
28  
29  
30  
31  
32  
33  
34  
35  
36  
37  
38  
39  
40  
41  
42  
43  
44  
45  
46

|                    |                                                         |                                   |                                                              |                            |                                                                          |                         |   |                       |
|--------------------|---------------------------------------------------------|-----------------------------------|--------------------------------------------------------------|----------------------------|--------------------------------------------------------------------------|-------------------------|---|-----------------------|
| Fadda 2018 [48]    | Third generation (INOVA Diagnostics) (20 U/mL)          | 84/88 (95.5)                      | 220 (0-500) (n=63) vs. 120 (30-400) (n=25), (median (range)) | -                          | <b>MD 67.5 (19.5-115.5)<sup>e</sup>, OR1.006 (1.001-1.011) (/1 U/mL)</b> | -                       | - | -                     |
| Furukawa 2012 [49] | Not specified (Medical & Biological Laboratories)       | 116/129 (89.9) vs. 278/321 (86.6) | -                                                            | OR 1.38 (0.71-2.69)        | -                                                                        | -                       | - | -                     |
| Kakutani 2019 [50] | Not specified                                           | (93.2) vs. (82.9)                 | -                                                            | <b>OR 2.83, p=0.002</b>    | -                                                                        | -                       | - | -                     |
| Kelly 2014 [51]    | Not specified                                           | -                                 | 180 (8-340) vs. 78 (8-340) (median (range))                  | <b>OR 4.00 (2.00-7.80)</b> | <b>p=0.02<sup>b</sup></b>                                                | <b>OR 0.33, p=0.003</b> | - | age, sex, smoking, RF |
| Liu 2019 [52]      | Second generation (Euro- Diagnostica) ( $\geq 25$ U/mL) | 77/101 (76.2)                     | -                                                            | OR 0.64 (0.23-1.80)        | -                                                                        | -                       | - | -                     |

|    |               |                      |                  |                                           |                            |                                  |                 |                    |                      |
|----|---------------|----------------------|------------------|-------------------------------------------|----------------------------|----------------------------------|-----------------|--------------------|----------------------|
| 1  |               |                      |                  |                                           |                            |                                  |                 |                    |                      |
| 2  |               |                      |                  |                                           |                            |                                  |                 |                    |                      |
| 3  |               |                      |                  |                                           |                            |                                  |                 |                    |                      |
| 4  |               |                      |                  |                                           |                            |                                  |                 |                    |                      |
| 5  | Matsuo 2018   | Not specified        | 25/26 (96.2) vs. | 199.7±104.6 (n=26) vs.                    | <b>OR 5.43 (1.11-98.0)</b> | <b>MD 79.0</b>                   | -               | <b>OR 1.08</b>     | age, smoking, RF,    |
| 6  | [53]          |                      | 235/286 (82.2)   | 120.7±112.6 (n=286)                       |                            | <b>(34.1-123.9),</b>             |                 | <b>(1.03-1.12)</b> | LDH, CRP, ESR,       |
| 7  |               |                      |                  |                                           |                            | <b>OR 1.06</b>                   |                 | <b>(/10U/mL)</b>   | KL-6, MMP-3, IL18,   |
| 8  |               |                      |                  |                                           |                            | <b>(1.02-1.10)</b>               |                 |                    | dose of MTX, dose of |
| 9  |               |                      |                  |                                           |                            | <b>(/10U/mL)</b>                 |                 |                    | PSL                  |
| 10 |               |                      |                  |                                           |                            |                                  |                 |                    |                      |
| 11 |               |                      |                  |                                           |                            |                                  |                 |                    |                      |
| 12 |               |                      |                  |                                           |                            |                                  |                 |                    |                      |
| 13 |               |                      |                  |                                           |                            |                                  |                 |                    |                      |
| 14 | Mori 2012     | Second generation    | 24/24 (100) vs.  | 283.5 (99.0-794.0)                        | OR 6.41 (0.38-107.8)       | <b>MD 275.2</b>                  | RR 2.73         | -                  | age, sex, smoking,   |
| 15 | [54]          | (Axis-Shield         | 294/332 (88.6)   | (n=24) vs. 81.1                           |                            | <b>(184.1-366.3)<sup>c</sup></b> | (0.91-8.23)     |                    | advanced stage, RF,  |
| 16 |               | Diagnostic) (>4.6    |                  | (21.0-249.0) (n=302)                      |                            |                                  | (positive with  |                    | HLA-DRB1*04,         |
| 17 |               | U/mL)                |                  | (median (1 <sup>st</sup> -3 <sup>rd</sup> |                            |                                  | high titre (≥90 |                    | HLA-DRB1*1502        |
| 18 |               |                      |                  | quartile)                                 |                            |                                  | U/mL))          |                    |                      |
| 19 |               |                      |                  |                                           |                            |                                  |                 |                    |                      |
| 20 |               |                      |                  |                                           |                            |                                  |                 |                    |                      |
| 21 |               |                      |                  |                                           |                            |                                  |                 |                    |                      |
| 22 |               |                      |                  |                                           |                            |                                  |                 |                    |                      |
| 23 | Ortancil 2011 | Second generation    | 7/12 (58.3) vs.  | -                                         | OR 1.45 (0.41-5.08)        | -                                | -               | -                  | -                    |
| 24 | [55]          | (Euroimmun)          | 27/55 (49.1)     |                                           |                            |                                  |                 |                    |                      |
| 25 |               |                      |                  |                                           |                            |                                  |                 |                    |                      |
| 26 |               |                      |                  |                                           |                            |                                  |                 |                    |                      |
| 27 | Park 2016     | Not specified (Roche | 69/83 (83.1)     | -                                         | -                          | 0.22 <sup>c</sup>                | -               | -                  | -                    |
| 28 | [56]          | Diagnostics) (≥17.0  |                  |                                           |                            |                                  |                 |                    |                      |
| 29 |               | U/mL)                |                  |                                           |                            |                                  |                 |                    |                      |
| 30 |               |                      |                  |                                           |                            |                                  |                 |                    |                      |
| 31 |               |                      |                  |                                           |                            |                                  |                 |                    |                      |
| 32 |               |                      |                  |                                           |                            |                                  |                 |                    |                      |
| 33 | Paulin 2019   | Second generation    | 45/47 (95.7) vs. | -                                         | OR 0.98 (0.13-7.24)        | -                                | -               | -                  | -                    |
| 34 | [57]          |                      | 46/48 (95.8)     |                                           |                            |                                  |                 |                    |                      |
| 35 |               |                      |                  |                                           |                            |                                  |                 |                    |                      |
| 36 |               |                      |                  |                                           |                            |                                  |                 |                    |                      |
| 37 |               |                      |                  |                                           |                            |                                  |                 |                    |                      |
| 38 |               |                      |                  |                                           |                            |                                  |                 |                    |                      |
| 39 |               |                      |                  |                                           |                            |                                  |                 |                    |                      |
| 40 |               |                      |                  |                                           |                            |                                  |                 |                    |                      |
| 41 |               |                      |                  |                                           |                            |                                  |                 |                    |                      |
| 42 |               |                      |                  |                                           |                            |                                  |                 |                    |                      |
| 43 |               |                      |                  |                                           |                            |                                  |                 |                    |                      |
| 44 |               |                      |                  |                                           |                            |                                  |                 |                    |                      |
| 45 |               |                      |                  |                                           |                            |                                  |                 |                    |                      |
| 46 |               |                      |                  |                                           |                            |                                  |                 |                    |                      |

|                          |                                                                |                                    |                                                                                                                 |                             |                                                                                        |               |                                      |                                                                                                 |
|--------------------------|----------------------------------------------------------------|------------------------------------|-----------------------------------------------------------------------------------------------------------------|-----------------------------|----------------------------------------------------------------------------------------|---------------|--------------------------------------|-------------------------------------------------------------------------------------------------|
| Restrepo<br>2015 [58]    | Not specified<br>(TheraTest) ( $\geq 7$<br>IU/mL)              | 44/69 (63.8) vs.<br>341/563 (60.6) | 5.54 $\pm$ 1.49 (n=69) vs.<br>4.68 $\pm$ 1.52 (n=563) (log<br>anti-CCP antibody titre)                          | OR 1.15 (0.69-1.91)         | <b>MD 0.86</b><br><b>(0.49-1.23) (log</b><br><b>anti-CCP</b><br><b>antibody titre)</b> | Not specified | Not specified                        | age, sex, disease<br>duration, DAS28, RF,<br>HLA-DRB1*SE, PSL<br>use                            |
| Rocha-Munoz<br>2015 [59] | Second generation<br>(Euroimmun) (>20<br>U/mL)                 | 39/39 (100) vs.<br>27/42 (64.3)    | 77.9 vs. 30.2 (median)                                                                                          | <b>OR 44.5 (2.54-778.3)</b> | <b>p&lt;0.001<sup>b</sup></b>                                                          | -             | <b>OR 1.06</b><br><b>(1.02-1.10)</b> | age, smoking, disease<br>duration, , DAS28,<br>HAQ-Di, RF, ESR,<br>duration of MTX<br>treatment |
| Sargin 2018<br>[60]      | Not specified                                                  | -                                  | 19.5 (1.8-140.8) (n=43)<br>vs. 6.2 (0.5-15.9)<br>(n=40) (median (1 <sup>st</sup> -3 <sup>rd</sup><br>quartile)) | -                           | MD 9.8<br>(-34.1-53.7) <sup>e</sup>                                                    | -             | -                                    | -                                                                                               |
| Sulaiman<br>2019 [61]    | Second generation<br>(Euro-Diagnostica)<br>( $\geq 20.0$ U/mL) | 13/21 (61.9) vs.<br>70/138 (50.7)  | -                                                                                                               | OR 1.58 (0.62-4.05)         | -                                                                                      | -             | -                                    | -                                                                                               |
| Tian 2016<br>[62]        | Not specified<br>(Euroimmun) ( $\geq 25$                       | 30/37 (81.1) vs.<br>28/38 (73.7)   | 475.2 $\pm$ 551.8 (n=37) vs.<br>332.0 $\pm$ 418.6 (n=38)                                                        | OR 1.53 (0.51-4.59)         | MD 143.2<br>(-78.1-364.5)                                                              | -             | -                                    | -                                                                                               |

|                    | RU/mL)                                                |                                   |                                                                                   |                            |                                        |                                      |   |                       |
|--------------------|-------------------------------------------------------|-----------------------------------|-----------------------------------------------------------------------------------|----------------------------|----------------------------------------|--------------------------------------|---|-----------------------|
| Wang 2015<br>[63]  | Not specified                                         | -                                 | 296.4 (1.91-500.0)<br>(n=25) vs. 392.9<br>(7.00-500.0) (n=16)<br>(median (range)) | -                          | MD -49.5<br>(-132.2-33.2) <sup>e</sup> | -                                    | - | -                     |
| Yang 2019<br>[64]  | Not specified ( $\geq 5.0$<br>IU/mL)                  | 33/43 (76.7) vs.<br>95/142 (66.9) | 242.8 $\pm$ 234.4 (n=43) vs.<br>125.3 $\pm$ 144.3 (n=142)                         | OR 1.63 (0.74-3.57)        | <b>MD 117.5</b><br><b>(59.7-175.3)</b> | -                                    | - | -                     |
| Yin 2014 [65]      | Second generation<br>(Euroimmun) ( $\geq 25$<br>U/mL) | 207/285 (72.6)                    | -                                                                                 | <b>OR 3.83 (1.74-8.43)</b> | -                                      | <b>OR 3.50</b><br><b>(1.52-8.04)</b> | - | age, disease duration |
| Zhang 2018<br>[66] | Not specified                                         | -                                 | 3.09 $\pm$ 0.34 (n=28) vs.<br>3.05 $\pm$ 0.32 (n=47)                              | -                          | MD 0.04<br>(-0.12-0.20)                | -                                    | - | -                     |

a, Comparisons correspond to RA-ILD vs. RA without ILD and the values are expressed as mean $\pm$ SD or number (proportion) unless otherwise specified. The value with an interval in the parenthesis indicates 95% confidence interval. Text in bold indicates statistical significance;

b, the difference of the titre of anti-CCP antibody between RA with and without ILD could not be calculated due to unavailability of relevant summary statistics, no information of the number of subjects and/or unknown summary statistics;

c, indicates correlation coefficient between anti-CCP antibody and a total ILD score;

1  
2  
3  
4 d, unknown statistics;  
5

6 e, MDs (95% confidence interval) were calculated converting the median, range or interquartile range to the mean and standard  
7 deviation, using a formula reported by a previous study;<sup>[32]</sup>  
8  
9

10 CCP, cyclic citrullinated peptide; CRP, C-reactive protein; DAS28, disease activity score 28; ESR, erythrocyte sedimentation rate;  
11 HAQ-Di, health assessment questionnaire-disability index; HLA, human leukocyte antigen; IL-18, interleukin-18; ILD, interstitial lung  
12 disease; IQR, interquartile range; KL-6, Krebs von den Lungen-6; LDH, lactate dehydrogenase; MD, mean difference; MMP-3, matrix  
13 metalloproteinase-3; MTX, methotrexate; OR, odds ratio; PSL, prednisolone; RA, rheumatoid arthritis; RF, rheumatoid factor; RR, risk  
14 ratio; SE, shared epitope;  
15  
16  
17  
18  
19  
20  
21  
22  
23  
24  
25  
26  
27  
28  
29  
30  
31  
32  
33  
34  
35  
36  
37  
38  
39  
40  
41  
42  
43  
44  
45  
46

Table 3 Risk of bias in individual studies

| Study                 | Study participation | Anti-CCP antibody measurement | ILD confirmation | Study confounding | Statistical analysis and reporting |
|-----------------------|---------------------|-------------------------------|------------------|-------------------|------------------------------------|
| Alunno 2018 [38]      | moderate risk       | low risk                      | <b>high risk</b> | <b>high risk</b>  | <b>high risk</b>                   |
| England 2019 [39]     | moderate risk       | <b>high risk</b>              | <b>high risk</b> | low risk          | <b>high risk</b>                   |
| Giles 2014 [40]       | moderate risk       | low risk                      | <b>high risk</b> | moderate risk     | <b>high risk</b>                   |
| Chen 2013 [41]        | low risk            | <b>high risk</b>              | low risk         | moderate risk     | <b>high risk</b>                   |
| Chen 2015 [42]        | moderate risk       | low risk                      | low risk         | moderate risk     | <b>high risk</b>                   |
| Doyle 2015 [43]       | moderate risk       | moderate risk                 | low risk         | moderate risk     | <b>high risk</b>                   |
| Abdel-Hamid 2019 [44] | moderate risk       | moderate risk                 | <b>high risk</b> | moderate risk     | <b>high risk</b>                   |
| Akiyama 2016 [45]     | low risk            | moderate risk                 | <b>high risk</b> | moderate risk     | moderate risk                      |
| Alexiou 2008 [46]     | moderate risk       | low risk                      | <b>high risk</b> | <b>high risk</b>  | <b>high risk</b>                   |
| Correia 2019 [47]     | moderate risk       | low risk                      | low risk         | moderate risk     | <b>high risk</b>                   |
| Fadda 2018 [48]       | moderate risk       | low risk                      | low risk         | moderate risk     | <b>high risk</b>                   |
| Furukawa2012 [49]     | moderate risk       | low risk                      | <b>high risk</b> | moderate risk     | <b>high risk</b>                   |
| Kakutani 2019 [50]    | low risk            | <b>high risk</b>              | <b>high risk</b> | moderate risk     | <b>high risk</b>                   |

1  
2  
3  
4  
5  
6  
7  
8  
9  
10  
11  
12  
13  
14  
15  
16  
17  
18  
19  
20  
21  
22  
23  
24  
25  
26  
27  
28  
29  
30  
31  
32  
33  
34  
35  
36  
37  
38  
39  
40  
41  
42  
43  
44  
45  
46

|                       |                  |                  |                  |                  |                  |
|-----------------------|------------------|------------------|------------------|------------------|------------------|
| Kelly 2014 [51]       | moderate risk    | <b>high risk</b> | low risk         | moderate risk    | <b>high risk</b> |
| Liu 2019 [52]         | moderate risk    | low risk         | <b>high risk</b> | moderate risk    | <b>high risk</b> |
| Matsuo 2018 [53]      | low risk         | moderate risk    | <b>high risk</b> | moderate risk    | moderate risk    |
| Mori2012 [54]         | low risk         | low risk         | low risk         | moderate risk    | moderate risk    |
| Ortancil 2011 [55]    | moderate risk    | low risk         | <b>high risk</b> | moderate risk    | <b>high risk</b> |
| Park2016 [56]         | low risk         | low risk         | low risk         | <b>high risk</b> | <b>high risk</b> |
| Paulin 2019 [57]      | moderate risk    | <b>high risk</b> | <b>high risk</b> | moderate risk    | <b>high risk</b> |
| Restrepo 2015 [58]    | moderate risk    | low risk         | <b>high risk</b> | moderate risk    | moderate risk    |
| Rocha-Munoz 2015 [59] | moderate risk    | low risk         | <b>high risk</b> | moderate risk    | low risk         |
| Sargin 2018 [60]      | moderate risk    | <b>high risk</b> | <b>high risk</b> | moderate risk    | <b>high risk</b> |
| Sulaiman 2019 [61]    | moderate risk    | low risk         | <b>high risk</b> | <b>high risk</b> | <b>high risk</b> |
| Tian 2016 [62]        | <b>high risk</b> | low risk         | <b>high risk</b> | moderate risk    | <b>high risk</b> |
| Wang 2015 [63]        | moderate risk    | <b>high risk</b> | low risk         | <b>high risk</b> | <b>high risk</b> |
| Yang 2019 [64]        | moderate risk    | <b>high risk</b> | moderate risk    | moderate risk    | moderate risk    |
| Yin 2014 [65]         | moderate risk    | low risk         | low risk         | moderate risk    | moderate risk    |

---

|                 |                  |                  |                  |                  |                  |
|-----------------|------------------|------------------|------------------|------------------|------------------|
| Zhang 2018 [66] | <b>high risk</b> |
|-----------------|------------------|------------------|------------------|------------------|------------------|

---

Text in bold indicates high risk of bias

CCP, cyclic citrullinated peptide; ILD, interstitial lung disease;

For peer review only



1  
2  
3  
4  
5  
6  
7  
8  
9  
10  
11  
12  
13  
14  
15  
16  
17  
18  
19  
20  
21  
22  
23  
24  
25  
26  
27  
28  
29  
30  
31  
32  
33  
34  
35  
36  
37  
38  
39  
40  
41  
42  
43  
44  
45  
46

Table 4 Assessment of quality of evidence by the Grades of Recommendation, Assessment, Development and Evaluation (GRADE) system

---

Outcome: rheumatoid arthritis-associated interstitial lung disease

---

| GRADE factors                |              |       |                   |               |              |                  |             |                            |             |                 |
|------------------------------|--------------|-------|-------------------|---------------|--------------|------------------|-------------|----------------------------|-------------|-----------------|
| Prognostic factors           | Analysis     | Phase | Study limitations | Inconsistency | Indirectness | Publication bias | Imprecision | Moderate/large effect size | Dose effect | Overall quality |
| Anti-CCP antibody positivity | Univariate   | 1     | +                 | +             | -            | +                | -           | -                          | -           | very low        |
|                              | Multivariate | 1     | +                 | +             | -            | +                | -           | -                          | -           | very low        |
| Anti-CCP antibody titre      | Univariate   | 1     | +                 | +             | -            | +                | -           | -                          | -           | very low        |
|                              | Multivariate | 1     | +                 | -             | -            | +                | -           | -                          | +           | low             |

---

CCP, cyclic citrullinated peptide;

1  
2  
3  
4  
5  
6 Figure legends  
7

8  
9 Figure 1 Study flow diagram  
10

11  
12 Out of a total of 827 records identified searching through five electronic databases, i.e.,  
13  
14 Medline, EMBASE, Science Citation Index Expanded, Cochrane Central Register of  
15  
16 Controlled Trials and Google Scholar, 645 records were screened by titles and abstracts  
17  
18 after removing 182 duplicates. After excluding 320 records consisting of non-English  
19  
20 reports (n=16) and articles of ineligible types (n=304) (conference proceedings (n=153),  
21  
22 case reports (n=72), editorials or letters (n=10) and review articles (n=69)) and 265  
23  
24 irrelevant reports, 60 records were retrieved as full-texts. Out of these, 31 records were  
25  
26 excluded due to no specific pulmonary disease (n=7), no ILD (n=5), no risk estimates  
27  
28 (n=11), no anti-CCP antibody (n=7) and no RA (n=1). The remaining 29 reports/studies  
29  
30 were eligible for the review and additionally four reports were identified through a  
31  
32 hand-search of references of eligible studies. As a result, a total of 33 reports/studies  
33  
34 were considered for the review. Among them, four studies were excluded due to  
35  
36 overlapped cohorts by other studies and finally a total of 29 studies/cohorts were  
37  
38 focused for further analysis.  
39  
40  
41  
42  
43  
44  
45  
46  
47

48 Figure 2 Forrest plot of the result of univariate analysis regarding the association of  
49  
50 positivity of anti-citrullinated peptide (CCP) antibody with rheumatoid  
51  
52 arthritis-associated interstitial lung disease (RA-ILD)  
53  
54

55 The results of univariate analyses in 19 studies were pooled for meta-analysis. The  
56  
57 positivity of anti-CCP antibody was significantly associated with RA-ILD with an odds  
58  
59

1  
2  
3  
4  
5  
6 ratio (OR) of 2.10 (95% confidence interval: 1.59-2.78,  $p < 0.00001$ /95% prediction  
7  
8 interval: 0.93-4.76). There was moderate heterogeneity ( $\chi^2=29.7$ ,  $p=0.04$ ,  $I^2=39\%$ ).  
9

10  
11  
12  
13  
14 Figure 3 Forrest plot of the result of univariate analysis regarding the association of the  
15  
16 titre of anti-citrullinated peptide (CCP) antibody with rheumatoid arthritis-associated  
17  
18 interstitial lung disease (RA-ILD)  
19

20  
21 The results of univariate analyses in 12 studies were pooled for meta-analysis. The titre  
22  
23 of anti-CCP antibody was significantly higher for RA-ILD than RA without ILD with a  
24  
25 standardized mean difference (SMD) of 0.42 (95% confidence interval: 0.20-0.65,  
26  
27  $p=0.0002$ /95% prediction interval: -0.33-1.17). There was considerable heterogeneity  
28  
29 ( $\chi^2=36.0$ ,  $p=0.0002$ ,  $I^2=69\%$ ).  
30  
31  
32  
33  
34  
35  
36  
37  
38  
39  
40  
41  
42  
43  
44  
45  
46  
47  
48  
49  
50  
51  
52  
53  
54  
55  
56  
57  
58  
59  
60

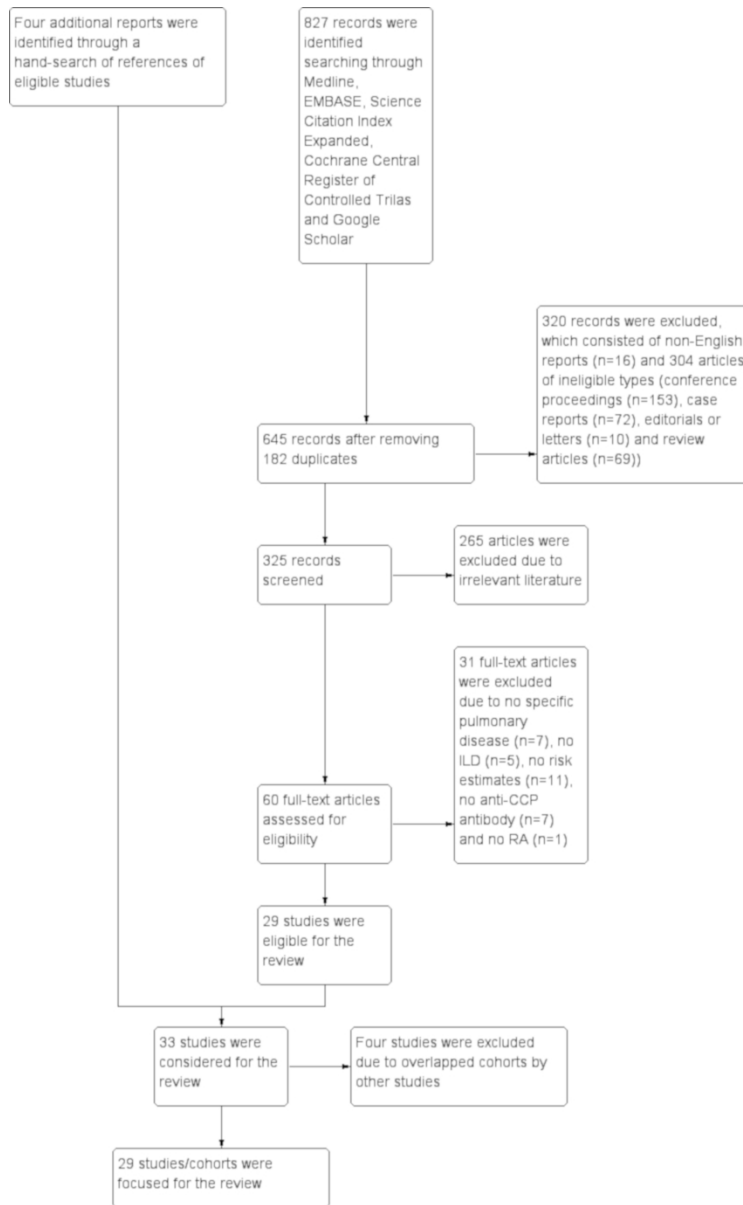

Figure 1

102x165mm (1100 x 1100 DPI)

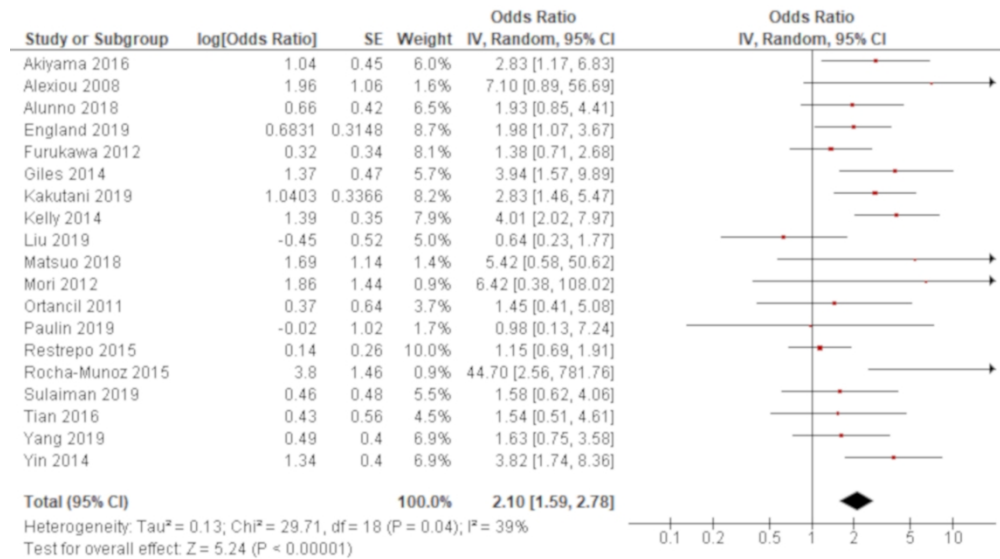

Figure 2

174x100mm (1200 x 1200 DPI)



Figure 3

206x83mm (1100 x 1100 DPI)

## Supplementary file

e-Table 1 Other baseline characteristics of included studies

| Study                 | RA diagnostic criteria | ILD diagnostic criteria                                                                                                      | Treatment received <sup>a</sup>                                     |
|-----------------------|------------------------|------------------------------------------------------------------------------------------------------------------------------|---------------------------------------------------------------------|
| Alunno 2018 [38]      | ACR/EULAR 2010         | X-ray and HRCT in symptomatic cases                                                                                          | -                                                                   |
| England 2019 [39]     | ACR 1987               | 1)Pulmonologist diagnosis and imaging,<br>2)non-pulmonologist diagnosis and two of the followings; imaging, pathology or PFT | PSL 63.0% vs. 42.8%, MTX 21.0% vs. 51.2%, Biologics 30.0% vs. 20.1% |
| Giles 2014 [40]       | ACR 1987               | Cardiac MDCT                                                                                                                 | PSL 51% vs. 32%, MTX 58% vs. 68%, TNF- $\alpha$ I 56% vs. 40%       |
| Chen 2013 [41]        | ACR 1987               | HRCT                                                                                                                         | -                                                                   |
| Chen 2015 [42]        | ACR 1987               | HRCT                                                                                                                         | PSL 57% vs. 68%, MTX 63% vs. 67%, TNF- $\alpha$ I 18% vs. 9%        |
| Doyle 2015 [43]       | -                      | HRCT                                                                                                                         | PSL 93.5% vs. 83%, MTX 78.5% vs. 76%, TNF- $\alpha$ I 73.5% vs. 55% |
| Abdel-Hamid 2019 [44] | ACR/EULAR 2010         | HRCT                                                                                                                         | -                                                                   |
| Akiyama 2016 [45]     | ACR/EULAR 2010         | HRCT in symptomatic cases or abnormal radiograph                                                                             | PSL 51.3% vs. 33.1%, MTX 24.4% vs. 61.8%, Biologics 50.0% vs. 43.2% |
| Alixiou 2008 [46]     | -                      | -                                                                                                                            | -                                                                   |
| Correia 2019 [47]     | ACR/EULAR 2010         | CT or radiograph and DLCO or pulmonologist                                                                                   | -                                                                   |

|                       |                            |                                      | diagnosis |                                                                                |
|-----------------------|----------------------------|--------------------------------------|-----------|--------------------------------------------------------------------------------|
| Fadda 2018 [48]       | ACR/EULAR 2010             | HRCT                                 |           | MTX 6.9±4.2 vs. 7.9±4.3 years (duration)                                       |
| Furukawa 2012 [49]    | ACR 1987                   | Radiograph or CT                     |           | -                                                                              |
| Kakutani 2019 [50]    | ACR 1987<br>ACR/EULAR 2010 | HRCT                                 |           | PSL 77.8% vs. 58.1%, MTX 44.4% vs. 66.5%, non- TNF-αI Biologics 10.7% vs. 4.8% |
| Kelly 2014 [51]       | ACR/EULAR 2010             | HRCT                                 |           | -                                                                              |
| Liu 2019 [52]         | ACR 1987                   | -                                    |           | -                                                                              |
| Matsuo 2018 [53]      | -                          | CT in abnormal radiograph            |           | PSL 65.4% vs. 41.6%, MTX 57.7% vs. 72.7%, Biologics 19.2% vs. 30.4%            |
| Mori 2012 [54]        | ACR 1987                   | HRCT                                 |           | MTX 12.5% vs. 12.8%, TNF-αI 0% vs. 0.2%                                        |
| Ortancil 2011 [55]    | ACR 1987                   | -                                    |           | -                                                                              |
| Park 2016 [56]        | ACR/EULAR 2010             | CT                                   |           | -                                                                              |
| Paulin 2019 [57]      | ACR/EULAR 2010             | HRCT                                 |           | MTX 51.9% vs. 74.2%, TNF-αI 11.5% vs. 24.2%                                    |
| Restrepo 2015 [58]    | ACR 1987                   | Clinical, PFT, imaging and pathology |           | PSL 63.7% vs. 46.5%, MTX 50.7% vs. 60.7%, TNF-αI 4.3% vs. 2.7%                 |
| Rocha-Munoz 2015 [59] | ACR 1987                   | Symptoms, PFT and HRCT               |           | PSL 94.9% vs. 88.1%, MTX 100.0% vs. 97.6%                                      |
| Sargin 2018 [60]      | ACR/EULAR 2010             | Symptoms, PFT, X-ray and HRCT        |           | -                                                                              |
| Sulaiman 2019         | ACR/EULAR 2010             | Radiograph and HRCT in               |           | -                                                                              |



|                 |                |  |                                         |                                                                    |
|-----------------|----------------|--|-----------------------------------------|--------------------------------------------------------------------|
| [61]            |                |  | positive clinical exam                  |                                                                    |
| Tian 2016 [62]  | ACR/EULAR 2010 |  | Clinical, PFT, imaging and/or pathology | -                                                                  |
| Wang 2015 [63]  | ACR 1987       |  | HRCT                                    | PSL 68.0% vs. 81.3%, MTX 64.0% vs. 81.3%                           |
| Yang 2019 [64]  | ACR 1987       |  | Clinical, PFT, imaging and/or pathology | MTX 39.0% vs. 76.2%, TNF- $\alpha$ I 5.2% vs. 5.2%                 |
| Yin 2014 [65]   | ACR 1987       |  | HRCT                                    | PSL 81.7% vs. 82.2%, MTX 53.5% vs. 66.4%, Biologics 8.5% vs. 15.0% |
| Zhang 2018 [66] | -              |  | -                                       | -                                                                  |

a, Comparisons correspond to RA-ILD vs. RA without ILD;

ACR, American College of Rheumatology; DLCO, diffusing capacity of the lung for carbon monoxide; EULAR, European League Against Rheumatism; HRCT, high resolution computed tomography; ILD, interstitial lung disease; MDCT, multi-detector computed tomography; MTX, methotrexate, PFT, pulmonary function test; PSL, prednisolone; RA, rheumatoid arthritis; TNF- $\alpha$ I, tumor necrosis factor- $\alpha$  inhibitor;

e-Table 2 Meta-regression analysis

| Potential confounder                                                                  | Positivity of anti-CCP antibody <sup>a</sup> |                                   | Titre of anti-CCP antibody <sup>b</sup> |                                   |
|---------------------------------------------------------------------------------------|----------------------------------------------|-----------------------------------|-----------------------------------------|-----------------------------------|
|                                                                                       | Univariate (95%CI)                           | Multivariate (95%CI) <sup>c</sup> | Univariate (95%CI)                      | Multivariate (95%CI) <sup>c</sup> |
| Age (at inclusion) (/year)                                                            | 0.02 (-0.04-0.07)                            | 0.06 (-0.03-0.16)                 | -0.01 (-0.08-0.06)                      | -0.01 (-0.09-0.06)                |
| Gender (male) (/percentage)                                                           | 0.003 (-0.009-0.02)                          | 0.003 (-0.009-0.02)               | <b>-0.02 (-0.04--0.004)</b>             | 0.004 (-0.04-0.05)                |
| Smoking history (/percentage)                                                         | -0.008 (-0.02-0.005)                         | -0.0005 (-0.03-0.02)              | 0.001 (-0.01-0.01)                      | 0.0008 (-0.006-0.008)             |
| RA duration (/year)                                                                   | 0.02 (-0.19-0.23)                            | 0.03 (-0.20-0.26)                 | <b>0.05 (0.01-0.09)</b>                 | 0.06 (-0.03-0.14)                 |
| RA diagnostic criteria (ACR/EULAR 2010 vs. ACR 1987)                                  | 0.36 (-0.22-0.94)                            | 0.47 (-0.25-1.18)                 | -0.17 (-0.94-0.59)                      | 0.06 (-1.24-1.36)                 |
| ILD diagnostic criteria (CT for all subjects vs. others)                              | 0.02 (-0.60-0.64)                            | -0.48 (-1.66-0.71)                | -0.24 (-1.26-0.78)                      | 0.20 (-0.21-0.61)                 |
| Proportion of positivity of anti-CCP antibody in subjects with RA alone (/percentage) | 0.009 (-0.01-0.03)                           | 0.02 (-0.02-0.06)                 | 0.01 (-0.01-0.04)                       | - <sup>d</sup>                    |

Text in bold indicates statistical significance;

a, The positivity of anti-CCP antibody for RA-ILD against RA alone (dependent variable) was regressed against each potential confounder and the value in each cell indicates a change of an OR with one unit increase of each covariate;

1  
2  
3  
4  
5 b, The difference of titres of anti-CCP antibody between RA-ILD and RA alone (dependent variable) was regressed against each  
6 potential confounder and the value in each cell indicates a change of an SMD with one unit increase of each covariate;  
7

8  
9 c, Each potential confounder was adjusted for RA duration and the effect of RA duration was estimated allowing for gender;  
10

11 d, The effect was unable to be estimated due to a small number of studies;  
12

13 ACR, American College of Rheumatology; CCP, cyclic citrullinated peptide; CI, confidence interval; EULAR, European League  
14 Against Rheumatism; ILD, interstitial lung disease; HRCT, high resolution computed tomography; OR, odds ratio; RA, rheumatoid  
15 arthritis; SMD, standardized mean difference;  
16  
17  
18  
19  
20  
21  
22  
23  
24  
25  
26  
27  
28  
29  
30  
31  
32  
33  
34  
35  
36  
37  
38  
39  
40  
41  
42  
43  
44  
45  
46

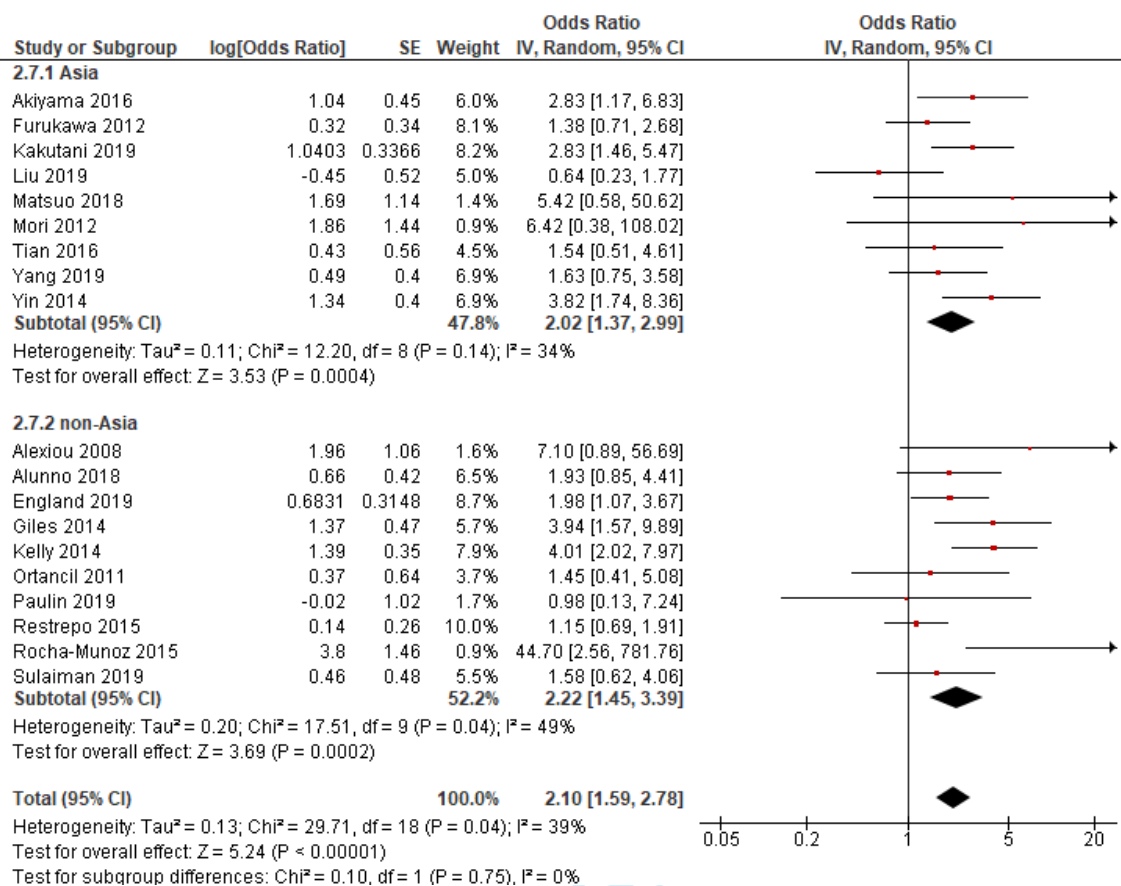

e-Figure 1 Subgroup analysis of the association of the positivity of anti-citrullinated peptide (CCP) antibody with rheumatoid arthritis-associated interstitial lung disease (RA-ILD) based on study location

A pooled analysis of studies in Asia and non-Asia individually demonstrated that the positivity of anti-CCP antibody was significantly associated with RA-ILD with odds ratios (ORs) of 2.02 (95% confidence interval (CI): 1.37-2.99, p=0.0004/95% prediction interval (PI): 0.81-5.05) and 2.22 (95% CI: 1.45-3.39, p=0.0002/95%PI: 0.71-6.98), respectively and there was no significant difference in these results (p=0.75). There remained moderate heterogeneity in both Asian and non-Asian studies.



e-Figure 2 Subgroup analysis of the association of the titre of anti-citrullinated peptide (CCP) antibody with rheumatoid arthritis-associated interstitial lung disease (RA-ILD) based on study location

A pooled analysis of studies in Asia and non-Asia individually demonstrated that the titre of anti-CCP antibody was significantly higher for RA-ILD than RA without ILD with standardized mean differences (SMDs) of 0.38 (95% confidence interval (CI): 0.04-0.71,  $p=0.03$ /95% prediction interval (PI): -0.74-1.50) and 0.49 (95%CI: 0.24-0.74,  $p<0.0001$ /95%PI: -0.33-1.31), respectively and there was no significant difference in these results ( $p=0.58$ ). There remained substantial heterogeneity in Asian studies ( $\chi^2=31.4$ ,  $p<0.0001$ ,  $I^2=78\%$ ).

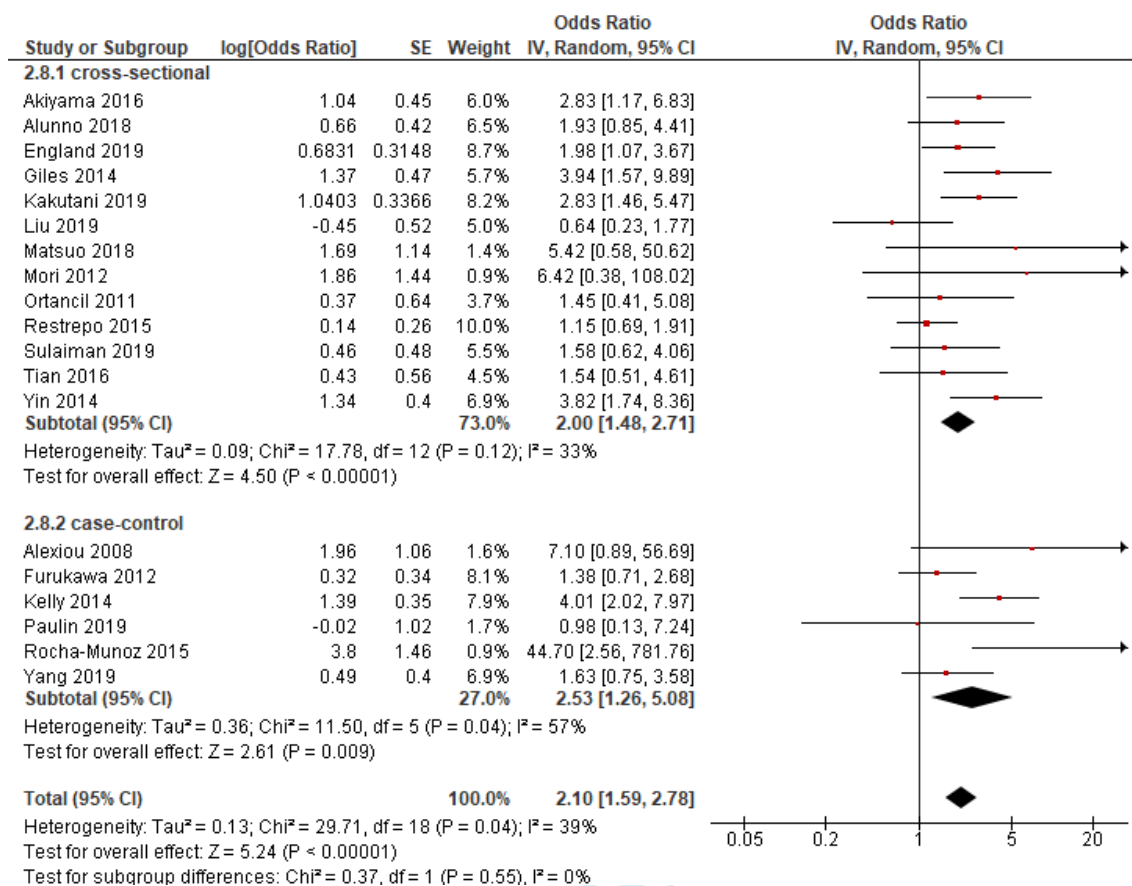

e-Figure 3 Subgroup analysis of the association of the positivity of anti-citrullinated peptide (CCP) antibody with rheumatoid arthritis-associated interstitial lung disease (RA-ILD) based on study design

A pooled analysis of cross-sectional and case-control studies individually demonstrated that the positivity of anti-CCP antibody was significantly associated with RA-ILD with odds ratios (ORs) of 2.00 (95% confidence interval (CI): 1.48-2.71,  $p < 0.00001$ /95% prediction interval (PI): 0.95-4.21) and 2.53 (95% CI: 1.26-5.08,  $p = 0.009$ /95% PI: 0.36-17.5), respectively and there was no significant difference in these results ( $p = 0.55$ ). There remained considerable heterogeneity in case-control studies ( $\chi^2 = 11.5$ ,  $p = 0.04$ ,  $I^2 = 57\%$ ).



e-Figure 4 Subgroup analysis of the association of the titre of anti-citrullinated peptide (CCP) antibody with rheumatoid arthritis-associated interstitial lung disease (RA-ILD) based on study design

A pooled analysis of cross-sectional and case-control studies individually demonstrated that the titre of anti-CCP antibody was significantly higher for RA-ILD than RA without ILD with standardized mean differences (SMDs) of 0.39 (95% confidence interval (CI): 0.11-0.67,  $p=0.006$ /95% prediction interval (PI): -0.53-1.31) and 0.50 (95%CI: 0.12-0.89,  $p=0.01$ /95%PI: -3.51-4.51), respectively and there was no significant difference in these results ( $p=0.65$ ). There remained substantial heterogeneity in cross-sectional studies ( $\chi^2=31.8$ ,  $p=0.0001$ ,  $I^2=75\%$ ).

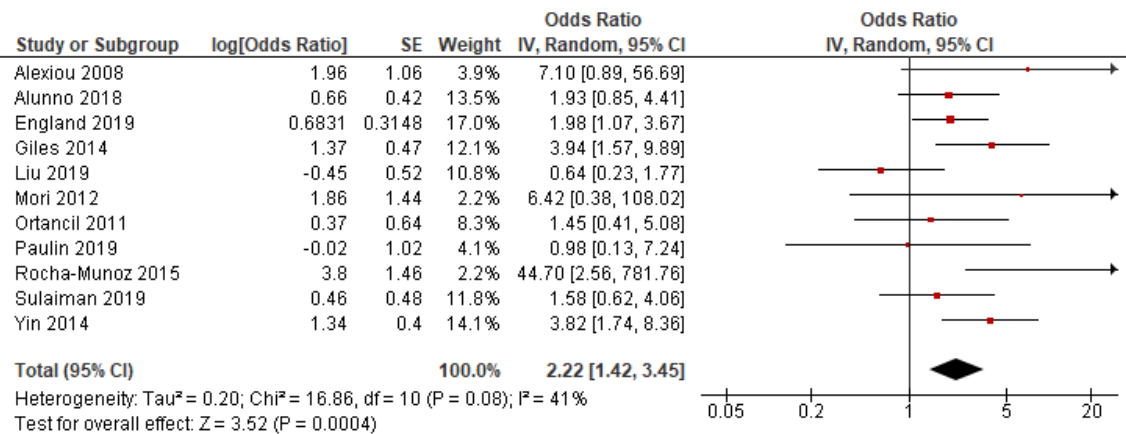

e-Figure 5 Sensitivity analysis of the association of the positivity of anti-citrullinated peptide (CCP) antibody with rheumatoid arthritis-associated interstitial lung disease (RA-ILD) focusing on the same generation of the autoantibody test

The results of univariate analyses in 11 studies that examined the second generation of anti-CCP antibody were pooled for meta-analysis. The positivity of anti-CCP antibody was significantly associated with RA-ILD with an odds ratio (OR) of 2.22 (95% confidence interval: 1.42-3.45,  $p=0.00041/95\%$  prediction interval: 0.72-6.89). There remained moderate heterogeneity ( $\chi^2=16.9$ ,  $p=0.08$ ,  $I^2=41\%$ ).



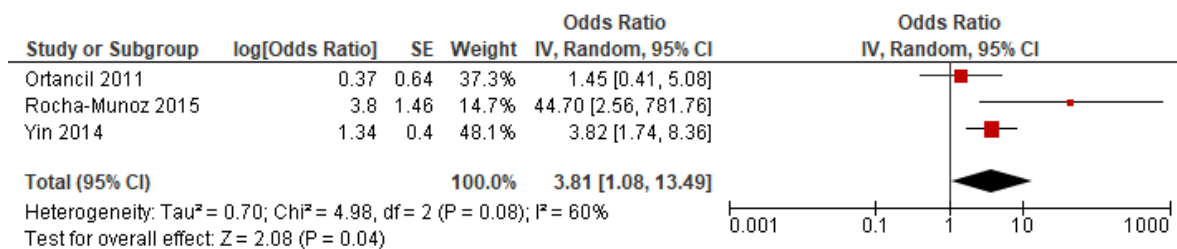

e-Figure 6 Sensitivity analysis of the association of the positivity of anti-citrullinated peptide (CCP) antibody with rheumatoid arthritis-associated interstitial lung disease (RA-ILD) focusing on the same generation of the autoantibody test by the same manufacturer

The results of univariate analyses in three studies that examined the second generation of anti-CCP antibody test by the same manufacturer (Euroimmun, Lübeck, Germany) were pooled for meta-analysis. The positivity of anti-CCP antibody was significantly associated with RA-ILD with an odds ratio (OR) of 3.81 (95% confidence interval: 1.08-13.5,  $p=0.04$ /95% prediction interval: 0.00->100.0). There remained considerable heterogeneity ( $\text{chi}^2=4.98$ ,  $p=0.08$ ,  $I^2=60\%$ ).

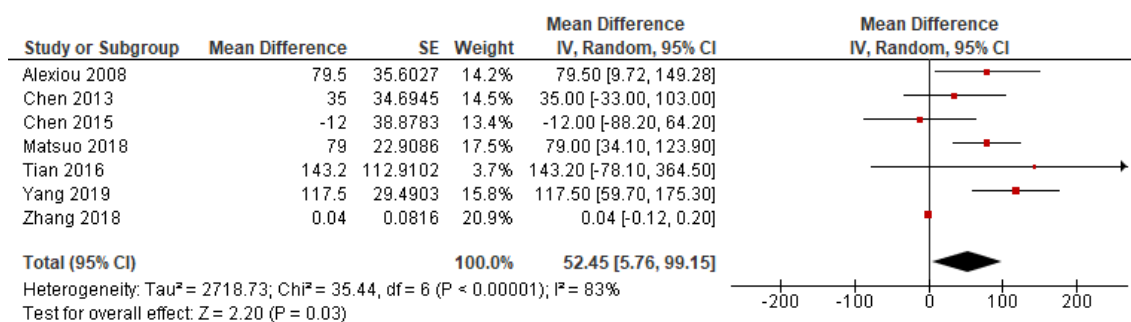

e-Figure 7 Sensitivity analysis of the association of the titre of anti-citrullinated peptide (CCP) antibody with rheumatoid arthritis-associated interstitial lung disease (RA-ILD) focusing on the same summary statistics

A pooled analysis of seven studies where mean differences (MDs) were available without a conversion of summary statistics demonstrated that higher titres of anti-CCP antibody was significantly associated with RA-ILD with an MD of 52.5 (95% confidence interval: 5.76-99.2, p=0.03/95% prediction interval: -94.9-199.9). There remained substantial heterogeneity (chi<sup>2</sup>=35.4, p<0.00001, I<sup>2</sup>=83%).



e-Figure 8 Funnel plot of the effect of the positivity of anti-citrullinated peptide (CCP) antibody against its standard error

The graphical inspection demonstrated no apparent asymmetry.



e-Figure 9 Funnel plot of the effect of the titre of anti-citrullinated peptide (CCP) antibody against its standard error

The graphical inspection demonstrated no apparent asymmetry.

## e-Appendix

## Search terms for each electronic database

## Medline (Ovid) (1946 through 12 November 2019)

- 1 exp Arthritis, Rheumatoid/ (110375)
- 2 ((rheumatoid or reumatoid or revmatoid or rheumatic or reumatic or revmatic or  
3 rheumat\$ or reumat\$ or revmarthrit\$) adj3 (arthrit\$ or artrit\$ or diseas\$ or condition\$ or  
4 nodule\$)).mp. (60240)
- 5 exp Lung Diseases, Interstitial/ (57554)
- 6 exp Pulmonary Fibrosis/ (21497)
- 7 (interstitial adj3 lung adj3 disease\$).mp. (14632)
- 8 (interstitial adj3 pneumoni\$).mp. (10671)
- 9 alveolitis.mp. (6068)
- 10 (pulmonary adj3 fibros\$).mp. (29467)
- 11 exp Anti-Citrullinated Protein Antibodies/ (211)
- 12 cyclic citrullinated protein antibod\$.mp. (28)
- 13 cyclic citrullinated peptide antibod\$.mp. (664)
- 14 citrullinated protein antibod\$.mp. (798)
- 15 citrullinated peptide antibod\$.mp. (1001)
- 16 anti-CCP.mp. (1527)
- 17 ACPA.mp. (1369)
- 18 1 or 2 (157282)
- 19 3 or 4 or 5 or 6 or 7 or 8 (88395)

- 1  
2  
3  
4  
5  
6 18 9 or 10 or 11 or 12 or 13 or 14 or 15 (3452)  
7  
8 19 16 and 17 and 18 (64)  
9  
10  
11  
12  
13  
14  
15  
16  
17  
18  
19  
20  
21  
22  
23  
24  
25  
26  
27  
28  
29  
30  
31  
32  
33  
34  
35  
36  
37  
38  
39  
40  
41  
42  
43  
44  
45  
46  
47  
48  
49  
50  
51  
52  
53  
54  
55  
56  
57  
58  
59  
60

For peer review only

EMBASE (Ovid) (1947 through 12 November 2019)

- 1 exp rheumatoid arthritis/ (218675)
- 2 ((rheumatoid or reumatoid or revmatoid or rheumatic or reumatic or revmatic or  
3 rheumat\$ or reumat\$ or revmarthrit\$) adj3 (arthrit\$or artrit\$ or diseas\$ or condition\$ or  
4 nodule\$)).mp. (106635)
- 5 exp interstitial lung disease/ (82134)
- 6 exp lung fibrosis/ (81580)
- 7 (interstitial adj3 lung adj3 disease\$.mp. (25821)
- 8 (interstitial adj3 pneumoni\$.mp. (22196)
- 9 alveolitis.mp. (29356)
- 10 (pulmonary adj3 fibros\$.mp. (32054)
- 11 exp cyclic citrullinated peptide antibody/ (6135)
- 12 cyclic citrullinated protein antibod\$.mp. (78)
- 13 cyclic citrullinated peptide antibod\$.mp. (6299)
- 14 citrullinated protein antibod\$.mp. (1603)
- 15 citrullinated peptide antibod\$.mp. (6704)
- 16 anti-CCP.mp. (4537)
- 17 ACPA.mp. (4424)
- 18 1 or 2 (285679)
- 19 3 or 4 or 5 or 6 or 7 or 8 (139209)
- 20 9 or 10 or 11 or 12 or 13 or 14 or 15 (11794)
- 21 16 and 17 and 18 (452)

1  
2  
3  
4  
5  
6 Science Citation Index Expanded (Clarivate Analytics) (1900 through 12 November  
7 2019)

8  
9  
10 #1 TS=(rheumatoid NEAR/3 arthritis or rheumatoid NEAR/3 disease\$ or rheumatoid  
11 NEAR/3 condition\$) (165,017)

12  
13  
14 #2 TS=("interstitial NEAR/3 lung NEAR/3 disease\$") OR TS=("interstitial NEAR/3  
15 pneumoni\*") OR TS=(alveolitis) OR TS=("pulmonary NEAR/3 fibros\*") (4,751)

16  
17  
18 #3 TS=(anti cyclic citrullinated protein antibod\* or anti cyclic citrullinated peptide  
19 antibod\* or anti citrullinated protein antibod\* or anti citrullinated peptide antibod\* or  
20 anti CCP or ACPA) (4,483)

21  
22  
23  
24 #3 #4 AND #5 AND #6 (2)



1  
2  
3  
4  
5  
6 Cochrane Central Register of Controlled Trials (Cochrane Library) (accessed on the 12<sup>th</sup>  
7 of November 2019)  
8

9  
10 #1 MeSH descriptor: [Arthritis, Rheumatoid] explode all trees (5530)  
11

12 #2 ((rheumatoid or reumatoid or revmatoid or rheumatic or reumatic or revmatic or  
13 rheumat\* or reumat\* or revmarthrit\*) near/3(arthrit\* or artrit\* or diseas\* or condition\*  
14 or nodule\*)):ti,ab,kw (17434)  
15  
16

17  
18 #3 MeSH descriptor: [Lung Diseases, Interstitial] explode all trees (738)  
19

20  
21 #4 MeSH descriptor: [Pulmonary Fibrosis] explode all trees (429)  
22

23 #5 interstitial near/3 lung near/3 disease\*:ti,ab,kw (1017)  
24

25 #6 interstitial near/3 pneumoni\*:ti,ab,kw (619)  
26

27 #7 alveolitis:ti,ab,kw (732)  
28

29 #8 pulmonary near/3 fibros\*:ti,ab,kw (1440)  
30

31  
32 #9 MeSH descriptor: [Anti-Citrullinated Protein Antibodies] explode all trees (6)  
33

34 #10 (cyclic citrullinated protein antibod\*):ti,ab,kw (105)  
35

36 #11 (cyclic citrullinated peptide antibod\*):ti,ab,kw (178)  
37

38 #12 (citrullinated protein antibod\*):ti,ab,kw (199)  
39

40 #13 (citrullinated peptide antibod\*):ti,ab,kw (225)  
41

42 #14 anti-CCP:ti,ab,kw (335)  
43

44 #15 ACPA:ti,ab,kw (292)  
45

46 #16 OR #2 (17673)  
47

48 #17 #3 OR #4 OR #5 OR #6 OR #7 OR #8 (3148)  
49

50 #18 #9 OR #10 OR #11 OR #12 OR #13 OR #14 OR #15 (728)  
51

52 #19 #16 AND #17 AND #18 (9)  
53  
54  
55  
56  
57  
58  
59  
60

1  
2  
3  
4  
5  
6 Google Scholar (accessed on the 12<sup>th</sup> of November 2019)  
7

8 (“rheumatoid arthritis” OR “rheumatoid disease”) (“interstitial lung disease” OR  
9 “interstitial pneumonia” OR “pulmonary fibrosis”) (“anti cyclic citrullinated protein  
10 antibody” OR “anti cyclic citrullinated peptide antibody” OR “anti citrullinated protein  
11 antibody” OR “anti citrullinated peptide antibody”)  
12  
13  
14  
15  
16  
17  
18  
19  
20  
21  
22  
23  
24  
25  
26  
27  
28  
29  
30  
31  
32  
33  
34  
35  
36  
37  
38  
39  
40  
41  
42  
43  
44  
45  
46  
47  
48  
49  
50  
51  
52  
53  
54  
55  
56  
57  
58  
59  
60

For peer review only

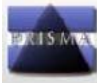

# PRISMA 2009 Checklist

1  
2  
3  
4  
5  
6  
7  
8  
9  
10  
11  
12  
13  
14  
15  
16  
17  
18  
19  
20  
21  
22  
23  
24  
25  
26  
27  
28  
29  
30  
31  
32  
33  
34  
35  
36  
37  
38  
39  
40  
41  
42  
43  
44  
45  
46  
47

| Section/topic                      | #  | Checklist item                                                                                                                                                                                                                                                                                              | Reported on page # |
|------------------------------------|----|-------------------------------------------------------------------------------------------------------------------------------------------------------------------------------------------------------------------------------------------------------------------------------------------------------------|--------------------|
| <b>TITLE</b>                       |    |                                                                                                                                                                                                                                                                                                             |                    |
| Title                              | 1  | Identify the report as a systematic review, meta-analysis, or both.                                                                                                                                                                                                                                         | Page 1             |
| <b>ABSTRACT</b>                    |    |                                                                                                                                                                                                                                                                                                             |                    |
| Structured summary                 | 2  | Provide a structured summary including, as applicable: background; objectives; data sources; study eligibility criteria, participants, and interventions; study appraisal and synthesis methods; results; limitations; conclusions and implications of key findings; systematic review registration number. | Page 3-4           |
| <b>INTRODUCTION</b>                |    |                                                                                                                                                                                                                                                                                                             |                    |
| Rationale                          | 3  | Describe the rationale for the review in the context of what is already known.                                                                                                                                                                                                                              | Page 5-6           |
| Objectives                         | 4  | Provide an explicit statement of questions being addressed with reference to participants, interventions, comparisons, outcomes, and study design (PICOS).                                                                                                                                                  | Page 6             |
| <b>METHODS</b>                     |    |                                                                                                                                                                                                                                                                                                             |                    |
| Protocol and registration          | 5  | Indicate if a review protocol exists, if and where it can be accessed (e.g., Web address), and, if available, provide registration information including registration number.                                                                                                                               | Not applicable     |
| Eligibility criteria               | 6  | Specify study characteristics (e.g., PICOS, length of follow-up) and report characteristics (e.g., years considered, language, publication status) used as criteria for eligibility, giving rationale.                                                                                                      | Page 6-7           |
| Information sources                | 7  | Describe all information sources (e.g., databases with dates of coverage, contact with study authors to identify additional studies) in the search and date last searched.                                                                                                                                  | Page 7             |
| Search                             | 8  | Present full electronic search strategy for at least one database, including any limits used, such that it could be repeated.                                                                                                                                                                               | Page 7-8           |
| Study selection                    | 9  | State the process for selecting studies (i.e., screening, eligibility, included in systematic review, and, if applicable, included in the meta-analysis).                                                                                                                                                   | Page 8             |
| Data collection process            | 10 | Describe method of data extraction from reports (e.g., piloted forms, independently, in duplicate) and any processes for obtaining and confirming data from investigators.                                                                                                                                  | Page 8             |
| Data items                         | 11 | List and define all variables for which data were sought (e.g., PICOS, funding sources) and any assumptions and simplifications made.                                                                                                                                                                       | Page 8             |
| Risk of bias in individual studies | 12 | Describe methods used for assessing risk of bias of individual studies (including specification of whether this was done at the study or outcome level), and how this information is to be used in any data synthesis.                                                                                      | Page 8-9           |
| Summary measures                   | 13 | State the principal summary measures (e.g., risk ratio, difference in means).                                                                                                                                                                                                                               | Page 9             |
| Synthesis of results               | 14 | Describe the methods of handling data and combining results of studies, if done, including measures of consistency (e.g., I <sup>2</sup> for each meta-analysis). <a href="http://bmjopen.bmj.com/site/about/guidelines.xhtml">http://bmjopen.bmj.com/site/about/guidelines.xhtml</a>                       | Page 9-10          |

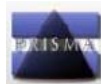

# PRISMA 2009 Checklist

Page 1 of 2

| Section/topic                 | #  | Checklist item                                                                                                                                                                                           | Reported on page # |
|-------------------------------|----|----------------------------------------------------------------------------------------------------------------------------------------------------------------------------------------------------------|--------------------|
| Risk of bias across studies   | 15 | Specify any assessment of risk of bias that may affect the cumulative evidence (e.g., publication bias, selective reporting within studies).                                                             | Page 11            |
| Additional analyses           | 16 | Describe methods of additional analyses (e.g., sensitivity or subgroup analyses, meta-regression), if done, indicating which were pre-specified.                                                         | Page 10-11         |
| <b>RESULTS</b>                |    |                                                                                                                                                                                                          |                    |
| Study selection               | 17 | Give numbers of studies screened, assessed for eligibility, and included in the review, with reasons for exclusions at each stage, ideally with a flow diagram.                                          | Page 11-12         |
| Study characteristics         | 18 | For each study, present characteristics for which data were extracted (e.g., study size, PICOS, follow-up period) and provide the citations.                                                             | Page 11-13         |
| Risk of bias within studies   | 19 | Present data on risk of bias of each study and, if available, any outcome level assessment (see item 12).                                                                                                | Page 13            |
| Results of individual studies | 20 | For all outcomes considered (benefits or harms), present, for each study: (a) simple summary data for each intervention group (b) effect estimates and confidence intervals, ideally with a forest plot. | Page 13-15         |
| Synthesis of results          | 21 | Present results of each meta-analysis done, including confidence intervals and measures of consistency.                                                                                                  | Page 13-14         |
| Risk of bias across studies   | 22 | Present results of any assessment of risk of bias across studies (see Item 15).                                                                                                                          | Page 16            |
| Additional analysis           | 23 | Give results of additional analyses, if done (e.g., sensitivity or subgroup analyses, meta-regression [see Item 16]).                                                                                    | Page 15-16         |
| <b>DISCUSSION</b>             |    |                                                                                                                                                                                                          |                    |
| Summary of evidence           | 24 | Summarize the main findings including the strength of evidence for each main outcome; consider their relevance to key groups (e.g., healthcare providers, users, and policy makers).                     | Page 17            |
| Limitations                   | 25 | Discuss limitations at study and outcome level (e.g., risk of bias), and at review-level (e.g., incomplete retrieval of identified research, reporting bias).                                            | Page 20-21         |
| Conclusions                   | 26 | Provide a general interpretation of the results in the context of other evidence, and implications for future research.                                                                                  | Page 21-22         |
| <b>FUNDING</b>                |    |                                                                                                                                                                                                          |                    |
| Funding                       | 27 | Describe sources of funding for the systematic review and other support (e.g., supply of data); role of funders for the systematic review.                                                               | Page 22            |

From: Moher D, Liberati A, Tetzlaff J, Altman DG, The PRISMA Group (2009). Preferred Reporting Items for Systematic Reviews and Meta-Analyses: The PRISMA Statement. PLoS Med 6(6): e1000097. doi:10.1371/journal.pmed1000097

1  
2  
3  
4  
5  
6  
7  
8  
9  
10  
11  
12  
13  
14  
15  
16  
17  
18  
19  
20  
21  
22  
23  
24  
25  
26  
27  
28  
29  
30  
31  
32  
33  
34  
35  
36  
37  
38  
39  
40  
41  
42  
43  
44  
45  
46

| Checklist items for Meta-analyses of Observational Studies in Epidemiology (MOOSE)                           | Reported      |
|--------------------------------------------------------------------------------------------------------------|---------------|
|                                                                                                              | on Page       |
| Reporting of background should include                                                                       |               |
| • Problem definition                                                                                         | Page 5-6      |
| • Hypothesis statement                                                                                       | Not described |
| • Description of study outcome(s)                                                                            | Page 7        |
| • Type of exposure or intervention used                                                                      | Page 7        |
| • Type of study designs used                                                                                 | Page 7        |
| • Study population                                                                                           | Page 6-7      |
| Reporting of search strategy should include                                                                  |               |
| • Qualifications of searchers (eg, librarians and investigators)                                             | Not described |
| • Search strategy, including time period included in the synthesis and keywords                              | Page 7-8      |
| • Effort to include all available studies, including contact with authors                                    | Page 8        |
| • Databases and registries searched                                                                          | Page 7        |
| • Search software used, name and version, including special features used (eg, explosion)                    | Not described |
| • Use of hand searching (eg, reference lists of obtained articles)                                           | Page 8        |
| • List of citations located and those excluded, including justification                                      | Figure 1      |
| • Method of addressing articles published in languages other than English                                    | Page 7        |
| • Method of handling abstracts and unpublished studies                                                       | Page 7        |
| • Description of any contact with authors                                                                    | Not described |
| Reporting of methods should include                                                                          |               |
| • Description of relevance or appropriateness of studies assembled for assessing the hypothesis to be tested | Not described |
| • Rationale for the selection and coding of data (eg, sound clinical principles or convenience)              | Not described |

|                                                                                                                                                                                                                                                                                |                                  |
|--------------------------------------------------------------------------------------------------------------------------------------------------------------------------------------------------------------------------------------------------------------------------------|----------------------------------|
| • Documentation of how data were classified and coded (eg, multiple raters, blinding, and interrater reliability)                                                                                                                                                              | Not described                    |
| • Assessment of confounding (eg, comparability of cases and controls in studies where appropriate)                                                                                                                                                                             | Not described                    |
| • Assessment of study quality, including blinding of quality assessors; stratification or regression on possible predictors of study results                                                                                                                                   | Page 8-9                         |
| • Assessment of heterogeneity                                                                                                                                                                                                                                                  | Page 10-11                       |
| • Description of statistical methods (eg, complete description of fixed or random effects models, justification of whether the chosen models account for predictors of study results, dose-response models, or cumulative meta-analysis) in sufficient detail to be replicated | Page 9-10                        |
| • Provision of appropriate tables and graphics                                                                                                                                                                                                                                 | Figure 1<br>(study flow diagram) |
| Reporting of results should include                                                                                                                                                                                                                                            |                                  |
| • Graphic summarizing individual study estimates and overall estimate                                                                                                                                                                                                          | Figure 2-3                       |
| • Table giving descriptive information for each study included                                                                                                                                                                                                                 | Table 1, 2                       |
| • Results of sensitivity testing (eg, subgroup analysis)                                                                                                                                                                                                                       | Page 15-16                       |
| • Indication of statistical uncertainty of findings                                                                                                                                                                                                                            | Page 13-15                       |
| Reporting of discussion should include                                                                                                                                                                                                                                         |                                  |
| • Quantitative assessment of bias (eg, publication bias)                                                                                                                                                                                                                       | Page 21                          |
| • Justification of exclusion (eg, exclusion of non-English-language citations)                                                                                                                                                                                                 | Not described                    |
| • Assessment of quality of included studies                                                                                                                                                                                                                                    | Page 21                          |
| Reporting of conclusions should include                                                                                                                                                                                                                                        |                                  |
| • Consideration of alternative explanations for observed results                                                                                                                                                                                                               | Page 22                          |
| • Generalization of the conclusions (ie, appropriate for the data presented and within the domain of the literature review)                                                                                                                                                    | Page 22                          |
| • Guidelines for future research                                                                                                                                                                                                                                               | Page 21                          |
| • Disclosure of funding source                                                                                                                                                                                                                                                 | Page 22                          |

1  
2  
3  
4  
5  
6  
7  
8  
9  
10  
11  
12  
13  
14  
15  
16  
17  
18  
19  
20  
21  
22  
23  
24  
25  
26  
27  
28  
29  
30  
31  
32  
33  
34  
35  
36  
37  
38  
39  
40  
41  
42  
43  
44  
45  
46

From Stroup DF, Berlin JA, Morton SC, et al. Meta-analysis of observational studies in epidemiology: a proposal for reporting. Meta-analysis Of Observational Studies in Epidemiology (MOOSE) group. JAMA 2000;283:2008-12.

For peer review only
